# Supplementary material for: Mechanism and electronic effects in nitrogen ylide-promoted asymmetric aziridination reaction
Source: Royal Society of Chemistry journal article supplement (doi:10.1039/c0ob00955e), 2011-01-01
Supplement: c0ob00955e.pdf [file c0ob00955e.pdf]

*Electronic Supplimentary Information*  
*for*

Mechanism and Electronic Effects in Nitrogen Ylide-Promoted  
Asymmetric Aziridination Reaction

Ramanan Rajeev and Raghavan B. Sunoj\*  
Department of Chemistry, Indian Institute of Technology Bombay  
Powai, Mumbai 400076

### Table of Contents

| List of Tables |                                                                                                                                                                                                                                                                     |    |
|----------------|---------------------------------------------------------------------------------------------------------------------------------------------------------------------------------------------------------------------------------------------------------------------|----|
| Table S1       | The Relative Energies (in kcal mol <sup>-1</sup> ) of Transition States for the Addition of G-ylide to Benzaldehyde with Various Substituents (X) at the para Position Obtained at the mPW1K/6-31G* level of theory                                                 | S4 |
| Table S2       | The Relative Energies (in kcal mol <sup>-1</sup> ) of Transition States for the Addition of G-ylide to Benzaldehyde with Various Substituents (X) at the para Position Obtained at the mPW1PW91/6-31G* level of theory                                              | S5 |
| Table S3       | The Relative Energies (in kcal mol <sup>-1</sup> ) of Transition States for the Addition of G-ylide to Benzaldehyde with Various Substituents (X) at the para Position Obtained at the PCM <sub>(THF)</sub> /mPW1PW91//6-311++G**// mPW1PW91/6-31G* level of theory | S6 |
| Table S4       | The Relative Energies (in kcal mol <sup>-1</sup> ) of Transition States for the Addition of G-ylide to Benzaldehyde with Various Substituents (X) at the para Position Obtained at the B3LYP/6-31G* level of theory                                                 | S7 |
| Table S5       | The Relative Energies (in kcal mol <sup>-1</sup> ) of Transition States for the Addition of G-ylide to Benzaldehyde with Various Substituents (X) at the para Position Obtained at the PCM <sub>(THF)</sub> /B3LYP/6-311++G**//B3LYP/6-31G* level of theory         | S8 |
| Table S6       | The Relative Energies (in kcal mol <sup>-1</sup> ) of Transition States for the Addition of g-ylide to Benzaldehyde with Various Substituents (X) at the para Position Obtained at the mPW1K /6-31+G** level of theory                                              | S9 |
| Table S7       | The Relative Energies (in kcal mol <sup>-1</sup> ) of Transition States for the Addition of g-ylide to Benzaldehyde with Various Substituents (X) at the para Position Obtained at the PCM <sub>(THF)</sub> /mPW1K/6-                                               | S9 |

|                                   |                                                                                                                                                                                                                                 |     |
|-----------------------------------|---------------------------------------------------------------------------------------------------------------------------------------------------------------------------------------------------------------------------------|-----|
|                                   | 311++G**//mPW1K /6-31+G** level of theory                                                                                                                                                                                       |     |
| Table S8                          | Relative Free Energies (in kcal mol <sup>-1</sup> ) of Transition States for the Addition of g-ylide to Benzaldehyde with Various Substituents (X) at the para Position Obtained at the mPW1K /6-31G* level of theory           | S10 |
| Table S9                          | Deformation Energies (in kcal mol <sup>-1</sup> ) around the Carbonyl Carbon of Electrophile (A) and Carbon Atom of Ylide (G) computed at the mPW1K/6-31G* level                                                                | S12 |
| Table S10                         | Free energy of activation (in kcal mol <sup>-1</sup> ) for the addition of ylide to aldehyde with various substituents at para position calculated at the PCM <sub>(THF)</sub> /mPW1K/6-311++G**// mPW1K/6-31G* level of theory | S13 |
| Table S11                         | Stereoselectivity calculated on the basis of the relative energies of pertinent transition states involved in the most preferred pathway                                                                                        | S15 |
| List of Figures                   |                                                                                                                                                                                                                                 |     |
| Figure S1                         | Correlation diagrams for activation energies with degree of pyramidalization around the carbon atoms computed at the mPW1K /6-31G* level of theory                                                                              | S11 |
| Figure S2                         | Hammett plots for the four stereochemical modes of addition of g-ylide (when R= <i>tert</i> -butyl) to para-substituted benzaldehydes computed at the B3LYP/6-31G* level of theory                                              | S14 |
| Figure S3                         | Hammett plots for the two stereochemical modes of addition of g-ylide (when R= Me) to para-substituted benzaldehydes computed at the mPW1K/6-31G* level of theory                                                               | S14 |
| Figure S4                         | Hammett plot for the fragmentation of <i>cis</i> and <i>trans</i> spiro intermediates of a simplified model computed at the B3LYP/6-31G* level of theory                                                                        | S15 |
| Other Information                 |                                                                                                                                                                                                                                 |     |
| Complete citation of reference 26 |                                                                                                                                                                                                                                 | S16 |

|                                                                                                                                                                                                                                |     |
|--------------------------------------------------------------------------------------------------------------------------------------------------------------------------------------------------------------------------------|-----|
| Total electronic energy (in a.u) and Cartesian coordinates of geometries optimized at the mPW1K/6-31G* level of theory. Gsol indicates the single-point energies at the PCM <sub>(THF)</sub> /mPW1K/6-311++G** level of theory | S17 |
|--------------------------------------------------------------------------------------------------------------------------------------------------------------------------------------------------------------------------------|-----|

**Table S1.** The Relative Energies (in kcal mol<sup>-1</sup>) Obtained at the mPW1K/6-31G\* level of theory for the Transition States for the Addition of g-ylide to Benzaldehyde with Substituents (X) at the para Position <sup>i</sup>

| Substituents (X) | TS1 <sub>re-re</sub> | TS2 <sub>re-si</sub> | TS3 <sub>si-si</sub> | TS4 <sub>si-re</sub> |
|------------------|----------------------|----------------------|----------------------|----------------------|
| NO <sub>2</sub>  | -ii-                 | -ii-                 | -ii-                 | -ii-                 |
| CN               | 0.00                 | 1.01                 | 4.53                 | 5.04                 |
| COOMe            | 0.00                 | 1.16                 | 5.50                 | 5.34                 |
| Cl               | 0.00                 | 0.78                 | 4.53                 | 4.85                 |
| H                | 0.00                 | 1.25                 | 5.30                 | 5.23                 |
| Me               | 0.00                 | 1.69                 | 5.31                 | 5.31                 |
| OMe              | 0.00                 | 1.28                 | 4.77                 | 5.08                 |
| OH               | 0.00                 | 1.51                 | 4.81                 | 4.85                 |

<sup>i</sup> The relative energies are with respect to the lowest energy transition state in each set of substituents. <sup>ii</sup> Transition state, TS1<sub>re-re</sub>(NO<sub>2</sub>) could not be optimized as all the attempts led to a saddle point with an undesired low imaginary frequency.

**Table S2.** The Relative Energies (in kcal mol<sup>-1</sup>) Obtained at the mPW1PW91/6-31G\* level of theory for the Transition States for the Addition of g-ylide to Benzaldehyde with Substituents (X) at the para Position <sup>i</sup>

| Substituents (X) | TS1 <sub>re-re</sub> | TS2 <sub>re-si</sub> | TS3 <sub>si-si</sub> | TS4 <sub>si-re</sub> |
|------------------|----------------------|----------------------|----------------------|----------------------|
| NO <sub>2</sub>  | 0.00                 | 0.89                 | -ii-                 | 4.82                 |
| CN               | 0.00                 | 0.76                 | 4.59                 | 5.33                 |
| COOMe            | 0.00                 | 1.41                 | 5.84                 | 5.37                 |
| Cl               | 0.00                 | 0.61                 | 4.69                 | 5.17                 |
| H                | 0.00                 | 1.55                 | 5.57                 | 5.36                 |
| Me               | 0.00                 | 0.90                 | 4.46                 | 4.37                 |
| OMe              | 0.00                 | 0.97                 | 4.84                 | 4.75                 |
| OH               | 0.00                 | 0.91                 | 3.95                 | 4.53                 |

<sup>i</sup> The relative energies are with respect to the lowest energy transition state in each set of substituents. <sup>ii</sup> Transition state, TS3<sub>si-re</sub>(NO<sub>2</sub>) could not be optimized as all the attempts led to a saddle point with an undesired low imaginary frequency.

**Table S3.** The Relative Energies (in kcal mol<sup>-1</sup>) Obtained at the PCM<sub>(THF)</sub>/mPW1PW91//6-311++G\*\*//mPW1PW91/6-31G\* level of theory for the Transition States for the Addition of g-ylide to Benzaldehyde with Substituents (X) at the para Position<sup>i</sup>

| Substituents (X) | TS1 <sub>re-re</sub> | TS2 <sub>re-si</sub> | TS3 <sub>si-si</sub> | TS4 <sub>si-re</sub> |
|------------------|----------------------|----------------------|----------------------|----------------------|
| NO <sub>2</sub>  | 0.00                 | 0.99                 | -ii-                 | 7.06                 |
| CN               | 0.00                 | 1.67                 | 6.78                 | 6.66                 |
| COOMe            | 0.00                 | 1.67                 | 5.90                 | 6.10                 |
| Cl               | 0.00                 | 1.93                 | 5.87                 | 5.52                 |
| H                | 0.00                 | 1.55                 | 4.87                 | 4.55                 |
| Me               | 0.00                 | 1.36                 | 4.76                 | 4.61                 |
| OMe              | 0.00                 | 0.33                 | 3.78                 | 3.27                 |
| OH               | 0.00                 | 1.06                 | 4.53                 | 3.96                 |

<sup>i</sup> The relative energies are with respect to the lowest energy transition state in each set of substituents. <sup>ii</sup> Transition state, TS3<sub>si-si</sub>(NO<sub>2</sub>) could not be optimized as all the attempts led to a saddle point with an undesired low imaginary frequency.

**Table S4.** The Relative Energies (in kcal mol<sup>-1</sup>) Obtained at the B3LYP/6-31G\* level of theory for the Transition States for the Addition of g-ylide to Benzaldehyde with Substituents (X) at the para Position <sup>i</sup>

| Substituents (X) | TS1 <sub>re-re</sub> | TS2 <sub>re-si</sub> | TS3 <sub>si-si</sub> | TS4 <sub>si-re</sub> |
|------------------|----------------------|----------------------|----------------------|----------------------|
| NO <sub>2</sub>  | 0.00                 | 1.64                 | -ii-                 | 5.56                 |
| CN               | 0.00                 | 1.06                 | 5.27                 | 5.22                 |
| COOMe            | 0.00                 | 1.05                 | 4.11                 | 5.38                 |
| Cl               | 0.00                 | 1.25                 | 5.01                 | 5.29                 |
| H                | 0.00                 | 1.25                 | 4.30                 | 5.39                 |
| Me               | 0.00                 | 0.49                 | 3.29                 | 5.01                 |
| OMe              | 0.00                 | 0.42                 | 4.46                 | 4.59                 |
| OH               | 0.00                 | 0.68                 | 3.70                 | 4.93                 |

<sup>i</sup> The relative energies are with respect to the lowest energy transition state in each set of substituents. <sup>ii</sup> Transition state, TS3<sub>si-si</sub>(NO<sub>2</sub>) could not be optimized as all the attempts led to a saddle point with an undesired low imaginary frequency.

**Table S5.** The Relative Energies (in kcal mol<sup>-1</sup>) of Transition States Obtained at the PCM<sub>(THF)</sub>/B3LYP/6-311++G\*\*//B3LYP/6-31G\* level of theory for the Addition of glylide to Benzaldehyde with Various Substituents (X) at the para Position <sup>i,ii</sup>

| Substituents (X) | TS1 <sub>re-re</sub> | TS2 <sub>re-si</sub> | TS3 <sub>si-si</sub> | TS4 <sub>si-re</sub> |
|------------------|----------------------|----------------------|----------------------|----------------------|
| NO <sub>2</sub>  | 0.00                 | 0.60                 | -ii-                 | 2.72                 |
| CN               | 0.00                 | 0.64                 | 2.26                 | 2.77                 |
| COOMe            | 0.00                 | 0.12                 | 2.32                 | 1.79                 |
| Cl               | 0.00                 | 0.28                 | 2.24                 | 1.98                 |
| H                | 0.00                 | 0.08                 | 1.92                 | 1.84                 |
| Me               | 0.00                 | 0.31                 | 1.85                 | 1.48                 |
| OMe              | 0.00                 | 0.02                 | 1.63                 | 1.20                 |
| OH               | 0.00                 | 0.03                 | 2.73                 | 1.19                 |

<sup>i</sup> For each substituents relative energy is calculated with respect to the lowest energy transition state. <sup>ii</sup> Transition state, TS3<sub>si-si</sub>(NO<sub>2</sub>) is not able to optimized as all the attempt to optimize leads to a saddle point with low imaginary frequency.



**Table S6.** The Relative Energies (in kcal mol<sup>-1</sup>) of Transition States for the Addition of g-ylide to Benzaldehyde with Various Substituents (X) at the para Position Obtained at the mPW1K/6-31+G\*\* level of theory<sup>i</sup>

| X <sup>ii</sup> | TS1 <sub>re-re</sub> | TS2 <sub>re-si</sub> | TS3 <sub>si-si</sub> | TS4 <sub>si-re</sub> |
|-----------------|----------------------|----------------------|----------------------|----------------------|
| COOMe           | 0.00                 | 0.94                 | 5.51                 | 5.56                 |
| Cl              | 0.00                 | 0.88                 | 5.26                 | 5.31                 |
| H               | 0.00                 | 0.81                 | 5.20                 | 5.18                 |
| Me              | 0.00                 | 0.78                 | 5.18                 | 5.10                 |

<sup>i</sup> For each substituent, the relative energy is calculated with respect to the lowest energy transition state.

**Table S7.** The Relative Energies (in kcal mol<sup>-1</sup>) of Transition States for the Addition of g-ylide to Benzaldehyde with Various Substituents (X) at the para Position Obtained at the PCM<sub>(THF)</sub>/mPW1K/6-311++G\*\*//mPW1K/6-31+G\*\* level of theory<sup>i</sup>

| X <sup>ii</sup> | TS1 <sub>re-re</sub> | TS2 <sub>re-si</sub> | TS3 <sub>si-si</sub> | TS4 <sub>si-re</sub> |
|-----------------|----------------------|----------------------|----------------------|----------------------|
| COOMe           | 0.00                 | 0.82                 | 4.92                 | 4.95                 |
| Cl              | 0.00                 | 0.87                 | 4.87                 | 4.91                 |
| H               | 0.00                 | 0.80                 | 4.61                 | 4.67                 |
| Me              | 0.00                 | 1.05                 | 4.77                 | 4.70                 |

<sup>i</sup> For each substituent, the relative energy is calculated with respect to the lowest energy transition state.

**Table S8.** Relative Gibbs Free Energies (in kcal mol<sup>-1</sup>) of Transition States for the Addition of g-ylide to Benzaldehyde with Various Substituents (X) at the para Position Obtained at the mPW1K/6-31G\* level of theory<sup>i</sup>

| $X^{ii}$ | TS1 <sub>re-re</sub> | TS2 <sub>re-si</sub> | TS3 <sub>si-si</sub> | TS4 <sub>si-re</sub> |
|----------|----------------------|----------------------|----------------------|----------------------|
| CN       | 0.00                 | 1.01                 | 4.53                 | 5.04                 |
| COOMe    | 0.00                 | 1.16                 | 5.50                 | 5.34                 |
| Cl       | 0.00                 | 0.78                 | 4.53                 | 4.85                 |
| H        | 0.00                 | 1.25                 | 5.30                 | 5.23                 |
| Me       | 0.00                 | 1.69                 | 5.31                 | 5.31                 |
| OMe      | 0.00                 | 1.28                 | 4.77                 | 5.08                 |
| OH       | 0.00                 | 1.51                 | 4.81                 | 4.85                 |

<sup>i</sup> For each substituent, the relative free energy is calculated with respect to the lowest energy transition state. <sup>ii</sup> Transition state, TS1<sub>re-re</sub>(NO<sub>2</sub>) could not be successfully optimized, as all attempts led to a saddle point with low imaginary frequency not pertaining to the reaction coordinate.

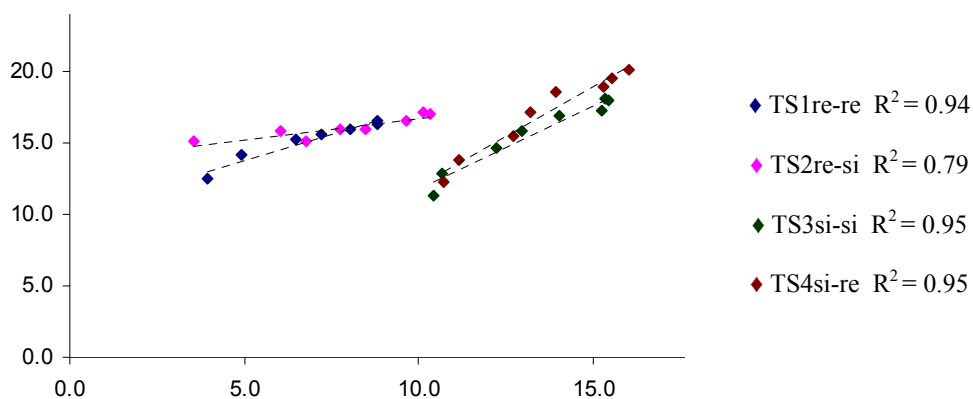

**Figure S1.** Correlation diagram for activation energies with degree of pyramidalization around the carbon atoms involved in the C-C bond formation. Activation energies (in kcal mol<sup>-1</sup>) in X-axis are computed at the mPW1K /6-31G\* level of theory

**Table S9.** Deformation Energies (in kcal mol<sup>-1</sup>) around the Carbonyl Carbon of Electrophile (A) and Carbon Atom of Ylide (G) <sup>i</sup> Computed at the mPW1K/6-31G\* Level of Theory

| Substituents (X) | TS1 <sub>re-re</sub> |      | TS2 <sub>re-si</sub> |      | TS3 <sub>si-si</sub> |      | TS4 <sub>si-re</sub> |      |
|------------------|----------------------|------|----------------------|------|----------------------|------|----------------------|------|
|                  | G                    | A    | G                    | A    | G                    | A    | G                    | A    |
| NO <sub>2</sub>  | -ii-                 | -ii- | 4.31                 | 4.46 | 11.56                | 1.95 | 12.05                | 2.27 |
| CN               | 3.90                 | 3.36 | 5.65                 | 5.82 | 12.53                | 2.61 | 12.84                | 2.73 |
| COOMe            | 5.18                 | 5.26 | 6.59                 | 5.53 | 13.43                | 3.25 | 13.85                | 3.35 |
| Cl               | 5.45                 | 6.36 | 6.81                 | 6.57 | 14.18                | 4.15 | 14.39                | 4.31 |
| H                | 6.06                 | 7.01 | 7.90                 | 6.76 | 14.59                | 4.63 | 15.14                | 5.06 |
| Me               | 6.34                 | 7.45 | 8.16                 | 7.33 | 14.96                | 5.03 | 15.33                | 5.41 |
| OMe              | 6.50                 | 8.30 | 8.48                 | 8.15 | 15.07                | 5.60 | 15.74                | 6.27 |
| OH               | 6.55                 | 8.06 | 8.37                 | 8.07 | 15.20                | 5.68 | 15.59                | 5.99 |

<sup>i</sup> Deformation energies are calculated by fragmenting both nucleophile and electrophile of respective pre-reacting complexes and the transition states followed by calculating the difference in energies of each fragments. <sup>ii</sup> Transition state, TS1<sub>re-re</sub>(NO<sub>2</sub>) could not be successfully optimized, as all attempts led to a saddle point with low imaginary frequency.

**Table S10.** Gibbs Free Energies of Activation (in kcal mol<sup>-1</sup>) Obtained at the PCM<sub>(THF)</sub>/mPW1K/6-311++G\*\*//mPW1K/6-31G\* Level of Theory for the Addition of g-ylide to Benzaldehyde with Various Substituents at para Position <sup>i</sup>

| Substituents<br>(X) | TS5 <sub>re-re</sub> | TS6 <sub>re-si</sub> |
|---------------------|----------------------|----------------------|
| NO <sub>2</sub>     | 3.21                 | -ii-                 |
| CN                  | 3.20                 | -ii-                 |
| COOH                | 4.95                 | 5.99                 |
| COOMe               | 5.56                 | 6.06                 |
| Cl                  | 6.52                 | 7.01                 |
| F                   | 7.44                 | 7.51                 |
| H                   | 6.82                 | 7.01                 |
| Me                  | 7.81                 | 7.54                 |
| OMe                 | 9.46                 | 9.1                  |
| OH                  | 8.62                 | 8.48                 |

<sup>i</sup> Absolute energies are with respect to the corresponding PRCs. PRCs are optimized and verified as true minima by frequency analysis. <sup>ii</sup> Transition state, TS6<sub>re-si</sub>(NO<sub>2</sub>) and (CN) could not be optimized as all attempts led to a saddle point with an undesired low imaginary frequency.

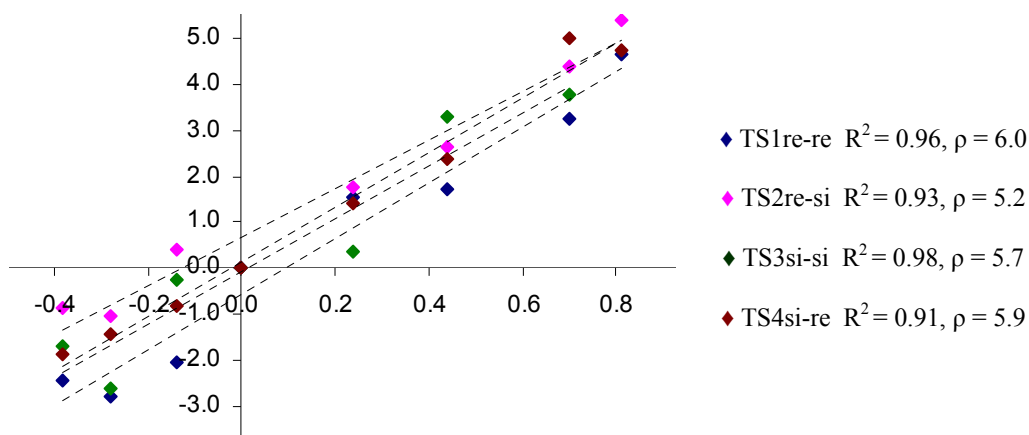

**Figure S2.** Hammett plots for the four stereochemical modes of addition of g-ylide (when R= *tert*-butyl) to para-substituted benzaldehydes. The  $-(\Delta G_x^\ddagger - \Delta G_H^\ddagger)$  term is in the Y-axis and substituent constant ( $\sigma$ ) is in the X-axis. Activation energies (in kcal mol<sup>-1</sup>) in the Y-axis are computed at the B3LYP/6-31G\* level of theory

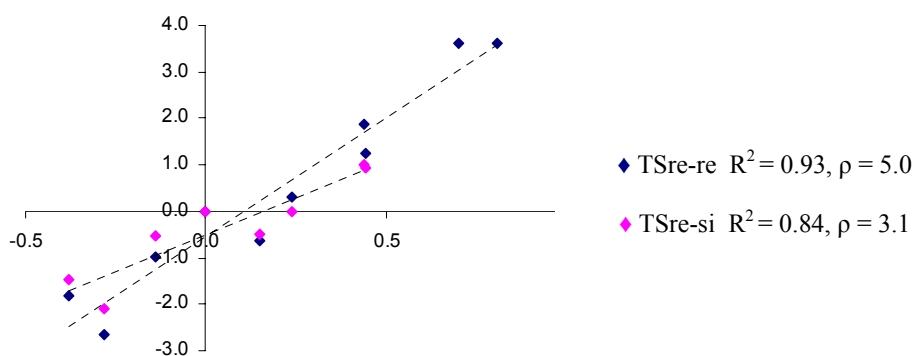

**Figure S3.** Hammett plots for the two stereochemical modes of addition of g-ylide (when R= Me) to para-substituted benzaldehydes. The  $-(\Delta G_x^\ddagger - \Delta G_H^\ddagger)$  term is in the Y-axis and substituent constant ( $\sigma$ ) is in the X-axis. Activation energies (in kcal mol<sup>-1</sup>) in the Y-axis are computed at the mPW1K/6-31G\* level of theory.

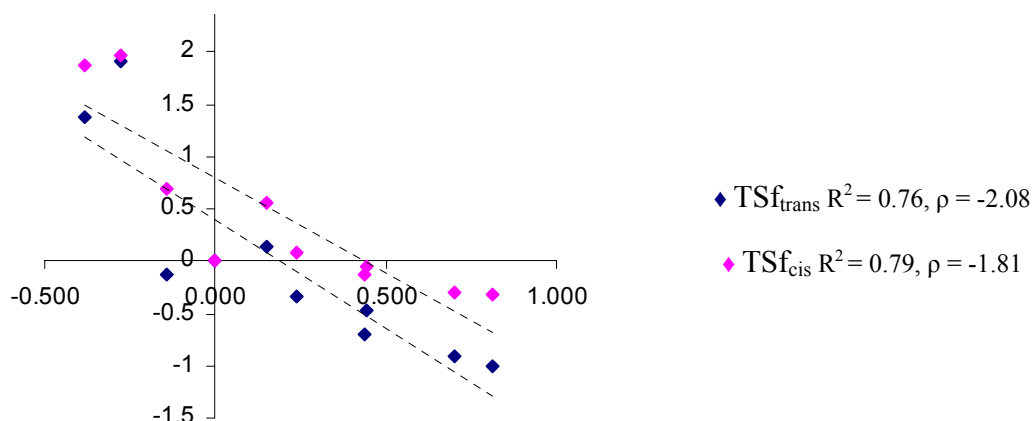

**Figure S4.** Hammett plot for the fragmentation of *cis* and *trans* oxaspirocyclic intermediates of a simplified model. The  $-(\Delta G_{\text{x}}^{\ddagger} - \Delta G_{\text{H}}^{\ddagger})$  term is in the Y-axis and substituent constant ( $\sigma$ ) is in the X-axis. Activation energies (in  $\text{kcal mol}^{-1}$ ) in the Y-axis are computed at the B3LYP/6-31G\* level of theory

**Table S11.** Stereoselectivity Calculated on the Basis of the Relative Energies of Pertinent Transition States Involved in the Most Preferred Pathway<sup>i</sup>

| Substituents | Selectivity determining transition states | Difference in energy ( $\text{kcal mol}^{-1}$ ) | <i>de</i> |
|--------------|-------------------------------------------|-------------------------------------------------|-----------|
| OH           | Addition                                  | 1.2                                             | 76        |
| OMe          | Addition                                  | 1.2                                             | 76        |
| Me           | Rotation                                  | 9.5                                             | >99       |
| H            | Rotation                                  | 8.3                                             | >99       |
| Cl           | Rotation                                  | 7.2                                             | >99       |
| COOMe        | Rotation                                  | 7.2                                             | >99       |

<sup>i</sup> *ee* of the reaction is determined by the difference in energies of the addition step  $\text{TS1}_{re-re}$  and  $\text{TS3}_{si-si}$ . Energy differences for the substituents considered is found to be  $> 4.5 \text{ kcal mol}^{-1}$ . These differences lead to an *ee*  $>99$ . Lower stereoselectivity noticed in experimental studies might be due to the likely involvement of competitive pathways ( $\text{S}_{\text{N}1}$  vs  $\text{S}_{\text{N}2}$ ). Low stereoselectivity noticed in the case of CN and  $\text{NO}_2$  is due to energetically closer transition states ( $\text{TS}_{cis}$  and  $\text{TSf3}$ ) as described in the text.

Full citation for Gaussian 03

Reference 26) Gaussian 03, Revision C.02, Frisch, M. J.; Trucks, G. W.; Schlegel, H. B.; Scuseria, G. E.; Robb, M. A.; Cheeseman, J. R.; Montgomery, Jr., J. A.; Vreven, T.; Kudin, K. N.; Burant, J. C.; Millam, J. M.; Iyengar, S. S.; Tomasi, J.; Barone, V.; Mennucci, B.; Cossi, M.; Scalmani, G.; Rega, N.; Petersson, G. A.; Nakatsuji, H.; Hada, M.; Ehara, M.; Toyota, K.; Fukuda, R.; Hasegawa, J.; Ishida, M.; Nakajima, T.; Honda, Y.; Kitao, O.; Nakai, H.; Klene, M.; Li, X.; Knox, J. E.; Hratchian, H. P.; Cross, J. B.; Bakken, V.; Adamo, C.; Jaramillo, J.; Gomperts, R.; Stratmann, R. E.; Yazyev, O.; Austin, A. J.; Cammi, R.; Pomelli, C.; Ochterski, J. W.; Ayala, P. Y.; Morokuma, K.; Voth, G. A.; Salvador, P.; Dannenberg, J. J.; Zakrzewski, V. G.; Dapprich, S.; Daniels, A. D.; Strain, M. C.; Farkas, O.; Malick, D. K.; Rabuck, A. D.; Raghavachari, K.; Foresman, J. B.; Ortiz, J. V.; Cui, Q.; Baboul, A. G.; Clifford, S.; Cioslowski, J.; Stefanov, B. B.; Liu, G.; Liashenko, A.; Piskorz, P.; Komaromi, I.; Martin, R. L.; Fox, D. J.; Keith, T.; Al-Laham, M. A.; Peng, C. Y.; Nanayakkara, A.; Challacombe, M.; Gill, P. M. W.; Johnson, B.; Chen, W.; Wong, M. W.; Gonzalez, C.; and Pople, J. A.; Gaussian, Inc., Wallingford CT, 2004.



Total electronic energy (in a.u) and Cartesian coordinates of geometries optimized at the mPW1K/6-31G\* level of theory. Gsol indicates the single-point energies at the PCM<sub>(THF)</sub>/mPW1K/6-311++G\*\* level of theory. *Pre-reacting complex for each transition states are denoted by 'PRC' followed by substituent and mode of addition*

| <b>TS1(CN)re-re</b> |           |           |           | <b>TS1(COOMe)re-re</b> |           |           |           |
|---------------------|-----------|-----------|-----------|------------------------|-----------|-----------|-----------|
| Et = -1341.175765   |           |           |           | Et = -1476.7722707     |           |           |           |
| Gsol = -1341.492903 |           |           |           | Gsol = -1477.125372    |           |           |           |
| 7                   | 3.474093  | -0.975296 | -0.339580 | 7                      | 3.850355  | -1.300275 | -0.332019 |
| 6                   | 2.456745  | -0.186981 | 0.050474  | 6                      | 2.930858  | -0.413610 | 0.087301  |
| 7                   | 2.459500  | -0.045079 | 1.387762  | 7                      | 2.872183  | -0.399632 | 1.431211  |
| 6                   | 3.448390  | -0.917755 | 1.995806  | 6                      | 3.684341  | -1.464429 | 1.992649  |
| 6                   | 4.329533  | -1.297937 | 0.793489  | 6                      | 4.581231  | -1.846368 | 0.803057  |
| 7                   | 1.570763  | 0.380271  | -0.744125 | 7                      | 2.186040  | 0.355864  | -0.681084 |
| 6                   | 1.921418  | 0.821697  | -2.097086 | 6                      | 2.661488  | 0.843511  | -1.978108 |
| 6                   | 3.135300  | 1.723467  | -2.117362 | 6                      | 3.994588  | 1.550577  | -1.877459 |
| 6                   | 1.856103  | 1.065527  | 2.081070  | 6                      | 2.386931  | 0.713658  | 2.206918  |
| 6                   | 2.813105  | -2.105536 | 2.691788  | 6                      | 2.841622  | -2.609553 | 2.519246  |
| 6                   | 5.651026  | -0.557306 | 0.741668  | 6                      | 5.989928  | -1.293874 | 0.893303  |
| 6                   | 3.495536  | -1.743068 | -1.562589 | 6                      | 3.835246  | -1.952730 | -1.621286 |
| 6                   | 0.206123  | 0.471213  | -0.329421 | 6                      | 0.816462  | 0.582191  | -0.332527 |
| 6                   | -0.316825 | 1.793029  | -0.220013 | 6                      | 0.453321  | 1.954162  | -0.146199 |
| 8                   | -1.530605 | 1.798771  | 0.370007  | 8                      | -0.767205 | 2.067878  | 0.412445  |
| 6                   | -2.257043 | 3.021757  | 0.572180  | 6                      | -1.362137 | 3.352303  | 0.658357  |
| 6                   | -2.605099 | 3.667297  | -0.758744 | 6                      | -1.591912 | 4.096995  | -0.646143 |
| 8                   | 0.232658  | 2.805956  | -0.634101 | 8                      | 1.132673  | 2.915318  | -0.478833 |
| 6                   | -3.517854 | 2.562752  | 1.282025  | 6                      | -2.688985 | 2.999659  | 1.305884  |
| 6                   | -1.474626 | 3.970785  | 1.466419  | 6                      | -0.511896 | 4.163763  | 1.623231  |
| 6                   | -0.603218 | -1.026623 | -1.923633 | 6                      | -0.067695 | -0.642612 | -1.993065 |
| 8                   | 0.344288  | -1.796811 | -2.044191 | 8                      | 0.765870  | -1.541882 | -2.121242 |
| 6                   | -1.830049 | -1.418305 | -1.182252 | 6                      | -1.390808 | -0.906151 | -1.364501 |
| 6                   | -2.983451 | -0.644981 | -1.236941 | 6                      | -2.436134 | 0.001975  | -1.479702 |
| 6                   | -4.134097 | -1.057144 | -0.596523 | 6                      | -3.676917 | -0.285143 | -0.944791 |
| 6                   | -4.137291 | -2.256714 | 0.113842  | 6                      | -3.882476 | -1.489463 | -0.278635 |
| 6                   | -2.984838 | -3.040812 | 0.166644  | 6                      | -2.839317 | -2.404460 | -0.167484 |
| 6                   | -1.844556 | -2.622451 | -0.485678 | 6                      | -1.606626 | -2.117540 | -0.714734 |
| 1                   | 2.476494  | -1.926769 | -1.895218 | 6                      | -5.183887 | -1.849192 | 0.317373  |
| 1                   | 4.057071  | -1.239440 | -2.349373 | 8                      | -5.404924 | -2.872876 | 0.910831  |
| 1                   | 3.976229  | -2.697310 | -1.359224 | 8                      | -6.114566 | -0.909813 | 0.133033  |
| 1                   | 1.752715  | 1.908747  | 1.403261  | 1                      | 2.821023  | -1.951246 | -2.014727 |
| 1                   | 0.873296  | 0.818952  | 2.477673  | 1                      | 4.512717  | -1.472175 | -2.327159 |
| 1                   | 2.508675  | 1.353041  | 2.902995  | 1                      | 4.158609  | -2.982479 | -1.486653 |
| 1                   | 4.509297  | -2.372965 | 0.789917  | 1                      | 2.437852  | 1.623055  | 1.614017  |
| 1                   | 4.028509  | -0.336171 | 2.712495  | 1                      | 1.358746  | 0.572487  | 2.534375  |
| 1                   | 2.129676  | -1.777060 | 3.472537  | 1                      | 3.024719  | 0.828169  | 3.081106  |
| 1                   | 2.249364  | -2.706299 | 1.979410  | 1                      | 4.616131  | -2.930361 | 0.696943  |

|                                        |           |           |           |                                         |           |           |           |
|----------------------------------------|-----------|-----------|-----------|-----------------------------------------|-----------|-----------|-----------|
| 1                                      | 3.574691  | -2.735073 | 3.150778  | 1                                       | 4.290447  | -1.048738 | 2.797845  |
| 1                                      | 6.278925  | -0.832432 | 1.588433  | 1                                       | 2.162405  | -2.265434 | 3.296952  |
| 1                                      | 6.193293  | -0.794442 | -0.171905 | 1                                       | 2.245481  | -3.041860 | 1.716878  |
| 1                                      | 5.486185  | 0.519015  | 0.769288  | 1                                       | 3.473514  | -3.389865 | 2.942235  |
| 1                                      | -0.074345 | -0.246839 | 0.421971  | 1                                       | 6.522634  | -1.733739 | 1.735774  |
| 1                                      | 1.062335  | 1.393744  | -2.424296 | 1                                       | 6.550763  | -1.513646 | -0.013339 |
| 1                                      | 2.022391  | -0.030311 | -2.763529 | 1                                       | 5.967431  | -0.212846 | 1.024935  |
| 1                                      | -0.743846 | -0.183540 | -2.611409 | 1                                       | 0.428108  | -0.128245 | 0.377162  |
| 1                                      | -2.973809 | 0.287056  | -1.782583 | 1                                       | 1.914084  | 1.563906  | -2.285493 |
| 1                                      | -5.033479 | -0.462227 | -0.640941 | 1                                       | 2.666253  | 0.040512  | -2.709725 |
| 1                                      | -3.000938 | -3.974279 | 0.708482  | 1                                       | -0.063520 | 0.230151  | -2.660372 |
| 1                                      | -0.946135 | -3.220576 | -0.484825 | 1                                       | -2.270984 | 0.937794  | -1.994297 |
| 1                                      | 3.316820  | 2.066674  | -3.134575 | 1                                       | -4.491689 | 0.415137  | -1.041001 |
| 1                                      | 2.952268  | 2.592429  | -1.489674 | 1                                       | -3.024915 | -3.337885 | 0.341920  |
| 1                                      | 4.037362  | 1.219055  | -1.772928 | 1                                       | -0.790447 | -2.822588 | -0.668681 |
| 1                                      | -3.240706 | 4.536497  | -0.592639 | 1                                       | 4.274487  | 1.940450  | -2.854747 |
| 1                                      | -1.707013 | 3.979142  | -1.281206 | 1                                       | 3.911486  | 2.386400  | -1.186499 |
| 1                                      | -3.154050 | 2.965416  | -1.385757 | 1                                       | 4.794744  | 0.891542  | -1.542694 |
| 1                                      | -4.165331 | 3.412330  | 1.492269  | 1                                       | -2.131017 | 5.023737  | -0.452199 |
| 1                                      | -4.065804 | 1.851790  | 0.667397  | 1                                       | -0.648086 | 4.331029  | -1.127038 |
| 1                                      | -3.269953 | 2.074365  | 2.222549  | 1                                       | -2.194705 | 3.492723  | -1.322868 |
| 1                                      | -2.092734 | 4.831231  | 1.720410  | 1                                       | -3.252762 | 3.903828  | 1.529842  |
| 1                                      | -1.200840 | 3.468484  | 2.393955  | 1                                       | -3.281205 | 2.371557  | 0.644177  |
| 1                                      | -0.573683 | 4.315517  | 0.970671  | 1                                       | -2.526773 | 2.452977  | 2.233043  |
| 6                                      | -5.323231 | -2.687299 | 0.782161  | 1                                       | -1.044512 | 5.070334  | 1.908718  |
| 7                                      | -6.278678 | -3.035432 | 1.324219  | 1                                       | -0.321314 | 3.586968  | 2.527961  |
| NImag = 1 (-59.9945 cm <sup>-1</sup> ) |           |           |           | 1                                       | 0.435599  | 4.436568  | 1.171377  |
|                                        |           |           |           | 6                                       | -7.381799 | -1.204494 | 0.684056  |
|                                        |           |           |           | 1                                       | -8.012686 | -0.355378 | 0.447669  |
|                                        |           |           |           | 1                                       | -7.788713 | -2.112306 | 0.247164  |
|                                        |           |           |           | 1                                       | -7.311295 | -1.336285 | 1.760322  |
|                                        |           |           |           | NImag = 1 (-107.7282 cm <sup>-1</sup> ) |           |           |           |
| <b>TS1(Cl)re-re</b>                    |           |           |           | <b>TS1(H)re-re</b>                      |           |           |           |
| Et = -1708.5743495                     |           |           |           | Et = -1248.9676894                      |           |           |           |
| Gsol = -1708.893711                    |           |           |           | Gsol = -1249.262789                     |           |           |           |
| 6                                      | -2.904413 | -0.482853 | -1.262474 | 6                                       | 1.571413  | 3.081238  | 0.234326  |
| 6                                      | -1.764864 | -1.267527 | -1.153127 | 6                                       | 1.773427  | 2.078539  | -0.706186 |
| 6                                      | -1.834332 | -2.462497 | -0.448016 | 6                                       | 3.066086  | 1.645762  | -0.969071 |
| 6                                      | -3.010389 | -2.860888 | 0.159245  | 6                                       | 4.142333  | 2.197225  | -0.294439 |
| 6                                      | -4.132680 | -2.057097 | 0.043491  | 6                                       | 3.932829  | 3.184852  | 0.656366  |
| 6                                      | -4.092737 | -0.870771 | -0.669429 | 6                                       | 2.643409  | 3.625798  | 0.918438  |
| 6                                      | -0.494806 | -0.901817 | -1.839980 | 6                                       | 0.612307  | 1.545458  | -1.472603 |
| 8                                      | 0.421085  | -1.724138 | -1.950051 | 8                                       | -0.481016 | 2.125691  | -1.457434 |
| 17                                     | -5.617500 | -2.551898 | 0.792906  | 6                                       | 0.178626  | -0.236352 | -0.285575 |
| 6                                      | 0.317290  | 0.500402  | -0.339890 | 6                                       | 1.027629  | -1.393104 | -0.282714 |

|   |           |           |           |   |           |           |           |
|---|-----------|-----------|-----------|---|-----------|-----------|-----------|
| 6 | -0.185084 | 1.837497  | -0.215701 | 8 | 0.812813  | -2.429691 | -0.894003 |
| 8 | 0.367799  | 2.840734  | -0.642776 | 7 | -1.145126 | -0.461647 | -0.788907 |
| 7 | 1.689656  | 0.407357  | -0.740528 | 6 | -1.292464 | -0.787578 | -2.208084 |
| 6 | 2.046955  | 0.844149  | -2.092015 | 6 | -2.269339 | -1.917674 | -2.445175 |
| 6 | 3.291893  | 1.702663  | -2.112130 | 6 | -2.182125 | -0.162930 | -0.033717 |
| 6 | 2.550347  | -0.217183 | 0.037812  | 7 | -3.334371 | 0.396496  | -0.445435 |
| 7 | 2.551210  | -0.109434 | 1.378789  | 6 | -4.302081 | 0.412078  | 0.643272  |
| 6 | 3.503384  | -1.033147 | 1.968793  | 6 | -3.417638 | 0.176889  | 1.878262  |
| 6 | 4.379489  | -1.408897 | 0.761462  | 7 | -2.229963 | -0.413721 | 1.288096  |
| 7 | 3.544668  | -1.025713 | -0.368428 | 6 | -3.457668 | 1.267216  | -1.593359 |
| 6 | 1.979440  | 1.000179  | 2.098266  | 6 | -1.429510 | -1.410940 | 1.950694  |
| 6 | 3.535007  | -1.774976 | -1.604555 | 6 | -3.100646 | 1.440251  | 2.654516  |
| 6 | 5.725833  | -0.712820 | 0.739547  | 6 | -5.386074 | -0.631092 | 0.457050  |
| 6 | 2.820590  | -2.217541 | 2.624577  | 8 | 2.133011  | -1.183682 | 0.455000  |
| 8 | -1.381330 | 1.857549  | 0.401910  | 6 | 3.172875  | -2.169829 | 0.549410  |
| 6 | -2.098578 | 3.086099  | 0.607887  | 6 | 3.789596  | -2.433616 | -0.814022 |
| 6 | -3.344583 | 2.637803  | 1.349789  | 6 | 4.186682  | -1.512486 | 1.468437  |
| 6 | -1.291853 | 4.040262  | 1.474492  | 6 | 2.646042  | -3.448153 | 1.182545  |
| 6 | -2.472736 | 3.719110  | -0.721775 | 1 | -2.490071 | 1.718427  | -1.804771 |
| 1 | 2.507110  | -1.909950 | -1.935127 | 1 | -3.829833 | 0.733996  | -2.468277 |
| 1 | 4.118955  | -1.282006 | -2.381691 | 1 | -4.166611 | 2.055048  | -1.349175 |
| 1 | 3.975656  | -2.751360 | -1.415783 | 1 | -1.078767 | -2.138317 | 1.223686  |
| 1 | 1.890764  | 1.857467  | 1.436424  | 1 | -0.564829 | -0.982168 | 2.453850  |
| 1 | 0.994095  | 0.769817  | 2.498860  | 1 | -2.049978 | -1.920898 | 2.685164  |
| 1 | 2.644437  | 1.258568  | 2.920057  | 1 | -4.748794 | 1.404732  | 0.689249  |
| 1 | 4.522615  | -2.488758 | 0.728467  | 1 | -3.880869 | -0.558724 | 2.536073  |
| 1 | 4.097606  | -0.493085 | 2.706339  | 1 | -2.400799 | 1.233271  | 3.461994  |
| 1 | 2.145187  | -1.888375 | 3.412060  | 1 | -2.649919 | 2.183482  | 1.998308  |
| 1 | 2.239010  | -2.774003 | 1.890915  | 1 | -4.005850 | 1.862367  | 3.090002  |
| 1 | 3.555776  | -2.888813 | 3.067280  | 1 | -6.111150 | -0.582659 | 1.268882  |
| 1 | 6.338857  | -1.034704 | 1.580776  | 1 | -5.916367 | -0.474254 | -0.480465 |
| 1 | 6.264901  | -0.940504 | -0.178281 | 1 | -4.953977 | -1.630815 | 0.439190  |
| 1 | 5.597542  | 0.367181  | 0.799149  | 1 | 0.199518  | 0.373532  | 0.601477  |
| 1 | 0.051735  | -0.190409 | 0.442587  | 1 | -0.307609 | -1.116633 | -2.514244 |
| 1 | 1.207515  | 1.448772  | -2.411355 | 1 | -1.538323 | 0.102638  | -2.780933 |
| 1 | 2.112957  | -0.006963 | -2.763626 | 1 | 0.912217  | 0.940451  | -2.340823 |
| 1 | -0.613243 | -0.090764 | -2.572074 | 1 | 3.225993  | 0.877156  | -1.712971 |
| 1 | -2.862939 | 0.441867  | -1.820184 | 1 | 5.146326  | 1.861597  | -0.513058 |
| 1 | -4.982230 | -0.266560 | -0.759448 | 1 | 4.771851  | 3.616419  | 1.183138  |
| 1 | -3.068210 | -3.789139 | 0.706579  | 1 | 2.478580  | 4.405561  | 1.648775  |
| 1 | -0.948493 | -3.078234 | -0.403842 | 1 | 0.561693  | 3.428629  | 0.396229  |
| 1 | 3.483026  | 2.043386  | -3.128413 | 1 | -2.305007 | -2.151333 | -3.508002 |
| 1 | 3.142266  | 2.575481  | -1.480712 | 1 | -1.935712 | -2.804564 | -1.911246 |
| 1 | 4.176402  | 1.165715  | -1.771455 | 1 | -3.281100 | -1.671797 | -2.125495 |
| 1 | -3.095778 | 4.596320  | -0.550210 | 1 | 4.640430  | -3.106155 | -0.709736 |
| 1 | -1.584984 | 4.017321  | -1.269482 | 1 | 3.064890  | -2.882650 | -1.485035 |

|                                         |           |           |           |                                         |           |           |           |
|-----------------------------------------|-----------|-----------|-----------|-----------------------------------------|-----------|-----------|-----------|
| 1                                       | -3.043166 | 3.015406  | -1.326768 | 1                                       | 4.146879  | -1.501590 | -1.249415 |
| 1                                       | -3.989367 | 3.490309  | 1.556901  | 1                                       | 5.049013  | -2.162705 | 1.607609  |
| 1                                       | -3.900692 | 1.913171  | 0.759223  | 1                                       | 4.521365  | -0.566205 | 1.049288  |
| 1                                       | -3.077158 | 2.167565  | 2.294288  | 1                                       | 3.742869  | -1.311769 | 2.441983  |
| 1                                       | -1.902181 | 4.903737  | 1.736969  | 1                                       | 3.472975  | -4.130559 | 1.376667  |
| 1                                       | -0.995939 | 3.544683  | 2.398832  | 1                                       | 2.166127  | -3.222397 | 2.134550  |
| 1                                       | -0.402735 | 4.379593  | 0.954235  | 1                                       | 1.928332  | -3.936853 | 0.532530  |
| NImag = 1 (-133.5993 cm <sup>-1</sup> ) |           |           |           | NImag = 1 (-152.4467 cm <sup>-1</sup> ) |           |           |           |
| <b>TS1(Me)re-re</b>                     |           |           |           | <b>TS1(OMe)re-re</b>                    |           |           |           |
| Et = -1288.2779118                      |           |           |           | Et = -1363.4530108                      |           |           |           |
| Gsol = -1288.577667                     |           |           |           | Gsol = -1363.776441                     |           |           |           |
| 7                                       | 2.422264  | 0.093776  | 1.350089  | 6                                       | -2.850965 | -0.380673 | -1.427595 |
| 6                                       | 2.400432  | -0.022088 | 0.008757  | 6                                       | -1.757952 | -1.192687 | -1.142580 |
| 7                                       | 3.486815  | -0.691246 | -0.419596 | 6                                       | -1.958717 | -2.319116 | -0.362421 |
| 6                                       | 4.393789  | -0.936574 | 0.694014  | 6                                       | -3.209445 | -2.629409 | 0.148683  |
| 6                                       | 3.486645  | -0.716576 | 1.914454  | 6                                       | -4.289868 | -1.804576 | -0.139594 |
| 7                                       | 1.448154  | 0.486194  | -0.745327 | 6                                       | -4.104431 | -0.678815 | -0.938035 |
| 6                                       | 1.698658  | 0.906180  | -2.124463 | 6                                       | -0.414744 | -0.922281 | -1.724144 |
| 6                                       | 2.824507  | 1.910794  | -2.228535 | 8                                       | 0.471706  | -1.791986 | -1.708299 |
| 6                                       | 3.542221  | -1.469530 | -1.637628 | 8                                       | -5.551748 | -2.016549 | 0.296201  |
| 6                                       | 5.602079  | -0.022108 | 0.655298  | 6                                       | 0.352371  | 0.500097  | -0.315775 |
| 6                                       | 2.960727  | -2.000512 | 2.526144  | 6                                       | -0.175915 | 1.830250  | -0.178415 |
| 6                                       | 1.730728  | 1.119629  | 2.087003  | 8                                       | 0.337645  | 2.844242  | -0.626577 |
| 6                                       | 0.085193  | 0.397185  | -0.308144 | 7                                       | 1.728683  | 0.442320  | -0.719647 |
| 6                                       | -0.606882 | 1.652693  | -0.231755 | 6                                       | 2.064253  | 0.890257  | -2.071175 |
| 8                                       | -1.757623 | 1.531352  | 0.454046  | 6                                       | 3.313098  | 1.742995  | -2.104103 |
| 6                                       | -2.661551 | 2.636796  | 0.608468  | 6                                       | 2.589851  | -0.218722 | 0.026414  |
| 6                                       | -1.995547 | 3.773097  | 1.368265  | 7                                       | 2.598413  | -0.159544 | 1.371023  |
| 8                                       | -0.236758 | 2.697523  | -0.746459 | 6                                       | 3.541051  | -1.116896 | 1.920271  |
| 6                                       | -3.183686 | 3.098452  | -0.741900 | 6                                       | 4.424948  | -1.427234 | 0.701207  |
| 6                                       | -3.788462 | 2.045026  | 1.435759  | 7                                       | 3.586594  | -1.007764 | -0.413761 |
| 6                                       | -0.524548 | -1.200677 | -1.640458 | 6                                       | 2.028006  | 0.918007  | 2.136798  |
| 8                                       | 0.476627  | -1.931241 | -1.625907 | 6                                       | 3.559763  | -1.731745 | -1.666039 |
| 6                                       | -1.787561 | -1.619375 | -0.971807 | 6                                       | 5.759945  | -0.709340 | 0.712276  |
| 6                                       | -1.781162 | -2.702679 | -0.102215 | 6                                       | 2.845640  | -2.333887 | 2.498961  |
| 6                                       | -2.953064 | -3.137647 | 0.487142  | 8                                       | -1.348031 | 1.821226  | 0.480116  |
| 6                                       | -4.168192 | -2.514348 | 0.215682  | 6                                       | -2.103402 | 3.025473  | 0.690987  |
| 6                                       | -4.170414 | -1.445239 | -0.673553 | 6                                       | -3.310352 | 2.540864  | 1.473548  |
| 6                                       | -2.996143 | -1.000985 | -1.256614 | 6                                       | -1.306308 | 4.019577  | 1.520893  |
| 1                                       | 2.533883  | -1.772863 | -1.914025 | 6                                       | -2.539395 | 3.625424  | -0.634979 |
| 1                                       | 4.012028  | -0.915859 | -2.450742 | 1                                       | 2.524144  | -1.876955 | -1.969892 |
| 1                                       | 4.136636  | -2.359662 | -1.445547 | 1                                       | 4.120512  | -1.214038 | -2.444364 |
| 1                                       | 1.512511  | 1.956389  | 1.429056  | 1                                       | 4.019008  | -2.704722 | -1.507080 |
| 1                                       | 0.794897  | 0.764631  | 2.514819  | 1                                       | 1.920941  | 1.795652  | 1.505303  |
| 1                                       | 2.378729  | 1.465553  | 2.890115  | 1                                       | 1.050819  | 0.665800  | 2.544729  |

|                                         |           |           |           |                                         |           |           |           |
|-----------------------------------------|-----------|-----------|-----------|-----------------------------------------|-----------|-----------|-----------|
| 1                                       | 4.715323  | -1.976556 | 0.650437  | 1                                       | 2.703303  | 1.156359  | 2.956420  |
| 1                                       | 4.008526  | -0.128507 | 2.669355  | 1                                       | 4.585003  | -2.502024 | 0.622176  |
| 1                                       | 2.250835  | -1.786818 | 3.322979  | 1                                       | 4.129167  | -0.620653 | 2.692634  |
| 1                                       | 2.451745  | -2.597143 | 1.770414  | 1                                       | 2.166426  | -2.047214 | 3.299726  |
| 1                                       | 3.775365  | -2.589805 | 2.946070  | 1                                       | 2.265648  | -2.839324 | 1.728022  |
| 1                                       | 6.276814  | -0.239329 | 1.482740  | 1                                       | 3.572843  | -3.035960 | 2.905768  |
| 1                                       | 6.153522  | -0.150065 | -0.274352 | 1                                       | 6.378493  | -1.058386 | 1.538575  |
| 1                                       | 5.293031  | 1.020029  | 0.725615  | 1                                       | 6.301697  | -0.886767 | -0.214987 |
| 1                                       | -0.051692 | -0.271150 | 0.524684  | 1                                       | 5.614177  | 0.364749  | 0.819770  |
| 1                                       | 0.779581  | 1.386985  | -2.434142 | 1                                       | 0.117503  | -0.183662 | 0.482290  |
| 1                                       | 1.851865  | 0.041449  | -2.764499 | 1                                       | 1.223081  | 1.501732  | -2.371965 |
| 1                                       | -0.693465 | -0.503236 | -2.474653 | 1                                       | 2.119621  | 0.045099  | -2.752335 |
| 1                                       | -3.017676 | -0.170968 | -1.949991 | 1                                       | -0.447678 | -0.177941 | -2.534547 |
| 1                                       | -5.106300 | -0.959559 | -0.916873 | 1                                       | -2.714501 | 0.492576  | -2.050927 |
| 6                                       | -5.434081 | -2.975145 | 0.873332  | 1                                       | -4.961407 | -0.061739 | -1.163296 |
| 1                                       | -2.932254 | -3.985027 | 1.160051  | 1                                       | -3.333265 | -3.515933 | 0.750826  |
| 1                                       | -0.841342 | -3.203069 | 0.079432  | 1                                       | -1.112443 | -2.964347 | -0.177637 |
| 1                                       | 2.937133  | 2.225971  | -3.264611 | 1                                       | 3.490613  | 2.091333  | -3.120268 |
| 1                                       | 2.586951  | 2.786489  | -1.628801 | 1                                       | 3.176610  | 2.611524  | -1.463749 |
| 1                                       | 3.780087  | 1.504892  | -1.899218 | 1                                       | 4.199742  | 1.199938  | -1.779579 |
| 1                                       | -3.942033 | 3.868093  | -0.601094 | 1                                       | -3.183846 | 4.485603  | -0.456047 |
| 1                                       | -2.379650 | 3.502219  | -1.348293 | 1                                       | -1.679715 | 3.943483  | -1.215618 |
| 1                                       | -3.642916 | 2.264610  | -1.270629 | 1                                       | -3.105652 | 2.893398  | -1.208761 |
| 1                                       | -4.564435 | 2.789652  | 1.606787  | 1                                       | -3.983543 | 3.370575  | 1.683766  |
| 1                                       | -4.225165 | 1.189978  | 0.924402  | 1                                       | -3.849630 | 1.783065  | 0.909591  |
| 1                                       | -3.414268 | 1.706501  | 2.400431  | 1                                       | -2.998208 | 2.100224  | 2.418881  |
| 1                                       | -2.731925 | 4.542643  | 1.597762  | 1                                       | -1.938638 | 4.865556  | 1.788490  |
| 1                                       | -1.589012 | 3.404652  | 2.309814  | 1                                       | -0.967529 | 3.548232  | 2.443252  |
| 1                                       | -1.193608 | 4.212389  | 0.784750  | 1                                       | -0.443999 | 4.381064  | 0.971091  |
| 1                                       | -5.436536 | -4.053939 | 1.021090  | 6                                       | -5.791662 | -3.141558 | 1.087841  |
| 1                                       | -5.559402 | -2.513850 | 1.854476  | 1                                       | -6.850423 | -3.126431 | 1.324987  |
| 1                                       | -6.308485 | -2.716083 | 0.279118  | 1                                       | -5.558204 | -4.065606 | 0.556006  |
|                                         |           |           |           | 1                                       | -5.217709 | -3.110853 | 2.015767  |
| NImag = 1 (-161.5503 cm <sup>-1</sup> ) |           |           |           | NImag = 1 (-179.1476 cm <sup>-1</sup> ) |           |           |           |
| <b>TS1(OH)re-re</b>                     |           |           |           | <b>TS2(NO<sub>2</sub>)re-si</b>         |           |           |           |
| Et = -1324.157527                       |           |           |           | Et = -1453.3863078                      |           |           |           |
| Gsol = -1324.488075                     |           |           |           | Gsol = -1453.741944                     |           |           |           |
| 7                                       | 2.430329  | 0.128740  | 1.337370  | 7                                       | -3.483483 | 0.598114  | -0.138728 |
| 6                                       | 2.396880  | -0.010268 | -0.001589 | 6                                       | -2.699994 | -0.461748 | 0.132031  |
| 7                                       | 3.483316  | -0.680328 | -0.428585 | 7                                       | -3.428392 | -1.591949 | 0.148997  |
| 6                                       | 4.400997  | -0.902456 | 0.681166  | 6                                       | -4.845402 | -1.282452 | 0.016290  |
| 6                                       | 3.503224  | -0.667338 | 1.905648  | 6                                       | -4.823201 | 0.166195  | -0.499182 |
| 7                                       | 1.435606  | 0.481317  | -0.755145 | 7                                       | -1.403022 | -0.376092 | 0.349817  |
| 6                                       | 1.671243  | 0.875857  | -2.144077 | 6                                       | -0.717872 | -1.287295 | 1.268750  |
| 6                                       | 2.789302  | 1.885783  | -2.277127 | 6                                       | -1.330758 | -1.281832 | 2.651212  |

|   |           |           |           |   |           |           |           |
|---|-----------|-----------|-----------|---|-----------|-----------|-----------|
| 6 | 3.529035  | -1.482802 | -1.631496 | 6 | -2.902958 | -2.909562 | -0.124641 |
| 6 | 5.603838  | 0.017786  | 0.617208  | 6 | -5.593507 | -1.458811 | 1.322571  |
| 6 | 2.988189  | -1.943916 | 2.541558  | 6 | -5.082634 | 0.291688  | -1.987626 |
| 6 | 1.740240  | 1.163460  | 2.062951  | 6 | -3.172571 | 1.950224  | 0.252313  |
| 6 | 0.076033  | 0.386714  | -0.306267 | 6 | -0.612908 | 0.541746  | -0.408109 |
| 6 | -0.625735 | 1.639253  | -0.246952 | 6 | 0.082394  | 1.532834  | 0.353481  |
| 8 | -1.766809 | 1.522777  | 0.454921  | 8 | 0.674250  | 2.439467  | -0.454011 |
| 6 | -2.674279 | 2.626795  | 0.605195  | 6 | 1.358503  | 3.584582  | 0.085011  |
| 6 | -2.000658 | 3.779798  | 1.332368  | 6 | 1.816201  | 4.327944  | -1.157032 |
| 8 | -0.270292 | 2.675633  | -0.787742 | 8 | 0.170604  | 1.559715  | 1.571293  |
| 6 | -3.221492 | 3.061343  | -0.744163 | 6 | 0.396145  | 4.448148  | 0.884740  |
| 6 | -3.783562 | 2.044783  | 1.462454  | 6 | 2.557057  | 3.166606  | 0.919825  |
| 6 | -0.527771 | -1.237646 | -1.582927 | 6 | 0.396827  | -0.974102 | -1.814455 |
| 8 | 0.473410  | -1.970360 | -1.539959 | 8 | -0.420142 | -1.891111 | -1.826566 |
| 6 | -1.798239 | -1.645112 | -0.923847 | 6 | 1.739110  | -1.121692 | -1.186717 |
| 6 | -1.803996 | -2.722696 | -0.049946 | 6 | 2.685028  | -0.104006 | -1.275684 |
| 6 | -2.978796 | -3.154697 | 0.537934  | 6 | 3.954305  | -0.279296 | -0.764924 |
| 6 | -4.175775 | -2.515711 | 0.240969  | 6 | 4.268905  | -1.489540 | -0.168201 |
| 6 | -4.188512 | -1.447926 | -0.646994 | 6 | 3.353660  | -2.524444 | -0.080240 |
| 6 | -3.004856 | -1.021688 | -1.217338 | 6 | 2.089972  | -2.334132 | -0.600885 |
| 1 | 2.518795  | -1.797078 | -1.888844 | 1 | -2.677011 | -3.455373 | 0.791294  |
| 1 | 3.986820  | -0.943125 | -2.460707 | 1 | -3.654638 | -3.468833 | -0.676596 |
| 1 | 4.130506  | -2.365727 | -1.428407 | 1 | -2.009858 | -2.822330 | -0.739200 |
| 1 | 1.508804  | 1.986100  | 1.391858  | 1 | -2.782923 | 2.539627  | -0.575646 |
| 1 | 0.811665  | 0.810523  | 2.508026  | 1 | -4.081035 | 2.420857  | 0.623092  |
| 1 | 2.394722  | 1.528938  | 2.852034  | 1 | -2.432793 | 1.940768  | 1.048117  |
| 1 | 4.728014  | -1.941201 | 0.651810  | 1 | -5.268777 | -1.940045 | -0.742556 |
| 1 | 4.028564  | -0.064888 | 2.646645  | 1 | -5.541507 | 0.770452  | 0.055025  |
| 1 | 2.284667  | -1.720762 | 3.341480  | 1 | -4.964468 | 1.322740  | -2.315569 |
| 1 | 2.474769  | -2.553540 | 1.799288  | 1 | -4.381496 | -0.325164 | -2.547993 |
| 1 | 3.808896  | -2.523655 | 2.962976  | 1 | -6.096075 | -0.026775 | -2.229481 |
| 1 | 6.287062  | -0.182290 | 1.442025  | 1 | -6.653285 | -1.243530 | 1.190432  |
| 1 | 6.147817  | -0.122089 | -0.315119 | 1 | -5.498979 | -2.479677 | 1.688193  |
| 1 | 5.289604  | 1.059230  | 0.673471  | 1 | -5.197052 | -0.787695 | 2.083359  |
| 1 | -0.044823 | -0.261488 | 0.544797  | 1 | -1.103626 | 0.884496  | -1.303412 |
| 1 | 0.746251  | 1.343935  | -2.455677 | 1 | 0.294883  | -0.909642 | 1.326814  |
| 1 | 1.826169  | 0.000306  | -2.768946 | 1 | -0.665313 | -2.287338 | 0.848996  |
| 1 | -0.689835 | -0.567697 | -2.440930 | 1 | 0.358661  | -0.174113 | -2.564289 |
| 1 | -3.016633 | -0.192259 | -1.911312 | 1 | 1.356009  | -3.124773 | -0.581929 |
| 1 | -5.130754 | -0.974968 | -0.879483 | 1 | 3.648103  | -3.454379 | 0.377305  |
| 8 | -5.357654 | -2.898747 | 0.778390  | 7 | 5.600706  | -1.682502 | 0.368994  |
| 1 | -2.971976 | -3.998404 | 1.217159  | 1 | 4.702903  | 0.493512  | -0.820184 |
| 1 | -0.867616 | -3.224861 | 0.143216  | 1 | 2.409200  | 0.834301  | -1.733460 |
| 1 | 2.891912  | 2.180904  | -3.320120 | 1 | -0.754699 | -1.931438 | 3.308155  |
| 1 | 2.550418  | 2.771688  | -1.693152 | 1 | -1.303981 | -0.272965 | 3.055600  |
| 1 | 3.749987  | 1.492740  | -1.947056 | 1 | -2.359781 | -1.640222 | 2.650274  |

|                                         |           |           |           |                                        |           |           |           |
|-----------------------------------------|-----------|-----------|-----------|----------------------------------------|-----------|-----------|-----------|
| 1                                       | -3.980170 | 3.830766  | -0.604260 | 1                                      | 3.123873  | 4.049448  | 1.213957  |
| 1                                       | -2.429912 | 3.456772  | -1.372087 | 1                                      | 2.242128  | 2.633058  | 1.809705  |
| 1                                       | -3.687446 | 2.216597  | -1.249095 | 1                                      | 3.213963  | 2.520294  | 0.340713  |
| 1                                       | -4.559860 | 2.788954  | 1.633766  | 1                                      | 2.341700  | 5.240123  | -0.880019 |
| 1                                       | -4.226277 | 1.178923  | 0.975114  | 1                                      | 2.490276  | 3.709874  | -1.747685 |
| 1                                       | -3.391047 | 1.725719  | 2.426492  | 1                                      | 0.963836  | 4.594179  | -1.779646 |
| 1                                       | -2.737341 | 4.548934  | 1.562117  | 1                                      | 0.891051  | 5.371191  | 1.184006  |
| 1                                       | -1.574711 | 3.430233  | 2.272545  | 1                                      | -0.468245 | 4.711794  | 0.275537  |
| 1                                       | -1.212284 | 4.213328  | 0.726457  | 1                                      | 0.059039  | 3.927264  | 1.774914  |
| 1                                       | -5.210609 | -3.648987 | 1.355179  | 8                                      | 6.390369  | -0.771753 | 0.260047  |
| NImag = 1 (-176.4583 cm <sup>-1</sup> ) |           |           |           | NImag = 1 (-70.7933 cm <sup>-1</sup> ) |           |           |           |
| <b>TS2(CN)re-si</b>                     |           |           |           | <b>TS2(COOMe)re-si</b>                 |           |           |           |
| Et = -1341.1740859                      |           |           |           | Et = -1476.7707297                     |           |           |           |
| Gsol = -1341.493027                     |           |           |           | Gsol = -1477.123185                    |           |           |           |
| 7                                       | -3.180535 | 0.720561  | -0.149347 | 7                                      | -3.759790 | 0.302316  | -0.085909 |
| 6                                       | -2.451192 | -0.371716 | 0.143034  | 6                                      | -2.822342 | -0.610911 | 0.233443  |
| 7                                       | -3.233437 | -1.465219 | 0.169489  | 7                                      | -3.370901 | -1.840438 | 0.294677  |
| 6                                       | -4.632362 | -1.088879 | 0.016425  | 6                                      | -4.815577 | -1.748740 | 0.115156  |
| 6                                       | -4.533773 | 0.347605  | -0.523648 | 6                                      | -4.981800 | -0.356389 | -0.510887 |
| 7                                       | -1.154375 | -0.342469 | 0.374726  | 7                                      | -1.561601 | -0.306624 | 0.458376  |
| 6                                       | -0.518939 | -1.277271 | 1.304678  | 6                                      | -0.725441 | -1.100579 | 1.360101  |
| 6                                       | -1.142706 | -1.235324 | 2.681678  | 6                                      | -1.302218 | -1.178395 | 2.755746  |
| 6                                       | -2.768856 | -2.808552 | -0.089836 | 6                                      | -2.650398 | -3.068137 | 0.041924  |
| 6                                       | -5.399498 | -1.204444 | 1.318459  | 6                                      | -5.562540 | -1.927866 | 1.421642  |
| 6                                       | -4.763275 | 0.457697  | -2.018280 | 6                                      | -5.111185 | -0.379917 | -2.021813 |
| 6                                       | -2.810172 | 2.061351  | 0.227012  | 6                                      | -3.690373 | 1.696387  | 0.265450  |
| 6                                       | -0.314640 | 0.518901  | -0.397704 | 6                                      | -0.929765 | 0.697866  | -0.337819 |
| 6                                       | 0.433855  | 1.482331  | 0.351586  | 6                                      | -0.284208 | 1.752286  | 0.380178  |
| 8                                       | 1.071168  | 2.344790  | -0.470006 | 8                                      | 0.143272  | 2.715941  | -0.467637 |
| 6                                       | 1.816683  | 3.459729  | 0.050249  | 6                                      | 0.756735  | 3.919958  | 0.020674  |
| 6                                       | 2.307313  | 4.160430  | -1.203968 | 6                                      | 1.015503  | 4.713153  | -1.247779 |
| 8                                       | 0.528100  | 1.520610  | 1.568094  | 8                                      | -0.092973 | 1.788120  | 1.585644  |
| 6                                       | 0.904331  | 4.383424  | 0.841274  | 6                                      | -0.204033 | 4.678252  | 0.923025  |
| 6                                       | 2.994849  | 2.990348  | 0.886770  | 6                                      | 2.066614  | 3.618713  | 0.729594  |
| 6                                       | 0.594295  | -1.028419 | -1.779279 | 6                                      | 0.050343  | -0.647656 | -1.876864 |
| 8                                       | -0.302053 | -1.869786 | -1.836367 | 8                                      | -0.793082 | -1.539989 | -1.971074 |
| 6                                       | 1.904720  | -1.321817 | -1.131624 | 6                                      | 1.400045  | -0.891644 | -1.295541 |
| 6                                       | 2.936674  | -0.388813 | -1.143750 | 6                                      | 2.341367  | 0.130626  | -1.225028 |
| 6                                       | 4.169544  | -0.699807 | -0.609332 | 6                                      | 3.611253  | -0.117311 | -0.745057 |
| 6                                       | 4.387062  | -1.963808 | -0.060550 | 6                                      | 3.960688  | -1.402555 | -0.337609 |
| 6                                       | 3.363191  | -2.909467 | -0.061151 | 6                                      | 3.028757  | -2.431051 | -0.424320 |
| 6                                       | 2.134960  | -2.585953 | -0.600552 | 6                                      | 1.760014  | -2.176895 | -0.905223 |
| 1                                       | -2.574817 | -3.356390 | 0.832227  | 1                                      | -2.289225 | -3.523629 | 0.963688  |
| 1                                       | -3.542380 | -3.336736 | -0.642223 | 1                                      | -3.329635 | -3.769018 | -0.436561 |

|                                                                  |           |           |           |                                                                 |           |           |           |
|------------------------------------------------------------------|-----------|-----------|-----------|-----------------------------------------------------------------|-----------|-----------|-----------|
| 1                                                                | -1.869348 | -2.767242 | -0.700281 | 1                                                               | -1.822536 | -2.866659 | -0.634984 |
| 1                                                                | -2.395341 | 2.624512  | -0.607062 | 1                                                               | -3.432389 | 2.326874  | -0.584092 |
| 1                                                                | -3.696345 | 2.576069  | 0.593374  | 1                                                               | -4.659006 | 2.007474  | 0.653191  |
| 1                                                                | -2.071044 | 2.027025  | 1.022697  | 1                                                               | -2.942864 | 1.839146  | 1.040312  |
| 1                                                                | -5.080334 | -1.738476 | -0.735000 | 1                                                               | -5.121175 | -2.515689 | -0.595095 |
| 1                                                                | -5.230546 | 0.995357  | 0.008501  | 1                                                               | -5.831359 | 0.160529  | -0.065321 |
| 1                                                                | -4.592919 | 1.476188  | -2.362223 | 1                                                               | -5.137659 | 0.631475  | -2.423172 |
| 1                                                                | -4.081582 | -0.200209 | -2.555482 | 1                                                               | -4.259376 | -0.896394 | -2.462836 |
| 1                                                                | -5.786167 | 0.181255  | -2.271846 | 1                                                               | -6.026014 | -0.888701 | -2.324227 |
| 1                                                                | -6.446696 | -0.941556 | 1.172751  | 1                                                               | -6.639045 | -1.881615 | 1.260017  |
| 1                                                                | -5.356549 | -2.221392 | 1.704138  | 1                                                               | -5.327903 | -2.890830 | 1.871443  |
| 1                                                                | -4.977536 | -0.538499 | 2.070041  | 1                                                               | -5.285620 | -1.147306 | 2.129140  |
| 1                                                                | -0.794898 | 0.884212  | -1.289712 | 1                                                               | -1.520862 | 0.997368  | -1.185198 |
| 1                                                                | 0.509423  | -0.946044 | 1.369658  | 1                                                               | 0.222651  | -0.580386 | 1.393483  |
| 1                                                                | -0.507702 | -2.281605 | 0.891842  | 1                                                               | -0.537373 | -2.084571 | 0.941669  |
| 1                                                                | 0.656531  | -0.220993 | -2.519778 | 1                                                               | 0.021699  | 0.223839  | -2.542811 |
| 1                                                                | 1.335104  | -3.309497 | -0.639350 | 1                                                               | 1.031282  | -2.967090 | -1.005158 |
| 1                                                                | 3.544895  | -3.890893 | 0.349996  | 1                                                               | 3.325433  | -3.422851 | -0.118410 |
| 1                                                                | 4.971006  | 0.023123  | -0.613362 | 1                                                               | 4.338941  | 0.676301  | -0.682160 |
| 1                                                                | 2.756201  | 0.590730  | -1.561736 | 1                                                               | 2.057160  | 1.127101  | -1.531763 |
| 1                                                                | -0.602289 | -1.906108 | 3.347525  | 1                                                               | -0.626560 | -1.739002 | 3.399594  |
| 1                                                                | -1.073654 | -0.226287 | 3.080772  | 1                                                               | -1.408124 | -0.174682 | 3.160276  |
| 1                                                                | -2.187024 | -1.546056 | 2.674096  | 1                                                               | -2.271534 | -1.675729 | 2.776389  |
| 1                                                                | 3.606012  | 3.846366  | 1.171345  | 1                                                               | 2.557833  | 4.551766  | 1.004427  |
| 1                                                                | 2.655125  | 2.481559  | 1.782015  | 1                                                               | 1.893475  | 3.030142  | 1.623688  |
| 1                                                                | 3.617583  | 2.306720  | 0.312443  | 1                                                               | 2.735517  | 3.066595  | 0.071259  |
| 1                                                                | 2.882836  | 5.046666  | -0.942522 | 1                                                               | 1.485859  | 5.665754  | -1.009875 |
| 1                                                                | 2.943263  | 3.498486  | -1.789368 | 1                                                               | 1.673710  | 4.160842  | -1.916182 |
| 1                                                                | 1.467242  | 4.463612  | -1.826313 | 1                                                               | 0.082534  | 4.908414  | -1.773562 |
| 1                                                                | 1.447581  | 5.283942  | 1.124939  | 1                                                               | 0.215105  | 5.652242  | 1.172857  |
| 1                                                                | 0.052090  | 4.682581  | 0.231431  | 1                                                               | -1.150968 | 4.840397  | 0.408597  |
| 1                                                                | 0.544547  | 3.893771  | 1.740209  | 1                                                               | -0.388716 | 4.128921  | 1.840153  |
| 6                                                                | 5.662027  | -2.292833 | 0.491395  | 6                                                               | 5.303442  | -1.727894 | 0.183066  |
| 7                                                                | 6.690557  | -2.559640 | 0.937301  | 8                                                               | 6.117892  | -0.671028 | 0.206209  |
|                                                                  |           |           |           | 8                                                               | 5.646964  | -2.820751 | 0.552275  |
|                                                                  |           |           |           | 6                                                               | 7.417760  | -0.925251 | 0.698870  |
|                                                                  |           |           |           | 1                                                               | 7.941924  | 0.022421  | 0.654874  |
|                                                                  |           |           |           | 1                                                               | 7.376033  | -1.288316 | 1.722098  |
|                                                                  |           |           |           | 1                                                               | 7.922389  | -1.666551 | 0.085336  |
|                                                                  |           |           |           |                                                                 |           |           |           |
|                                                                  |           |           |           |                                                                 |           |           |           |
| NImag = 1 (-96.9097 cm <sup>-1</sup> )                           |           |           |           | NImag = 1 (-106.0811 cm <sup>-1</sup> )                         |           |           |           |
| <b>TS2(Cl)re-si</b><br>Et = -1708.5728343<br>Gsol = -1708.891670 |           |           |           | <b>TS2(H)re-si</b><br>Et = -1248.9664854<br>Gsol = -1249.260167 |           |           |           |
| 6                                                                | 1.974825  | -2.489254 | -0.816372 | 6                                                               | -2.804258 | 1.727510  | -0.734263 |
| 6                                                                | 1.775149  | -1.158745 | -1.159086 | 6                                                               | -1.488799 | 2.138254  | -0.918342 |



|   |           |           |           |   |           |           |           |
|---|-----------|-----------|-----------|---|-----------|-----------|-----------|
| 6 | 2.815008  | -0.254090 | -0.980669 | 6 | -1.116000 | 3.414462  | -0.516364 |
| 6 | 4.021906  | -0.657963 | -0.442099 | 6 | -2.034801 | 4.257405  | 0.086701  |
| 6 | 4.191469  | -1.988279 | -0.091247 | 6 | -3.339622 | 3.834093  | 0.285579  |
| 6 | 3.177620  | -2.911791 | -0.278011 | 6 | -3.723187 | 2.566294  | -0.130473 |
| 6 | 0.491641  | -0.746708 | -1.796707 | 6 | -0.503229 | 1.268546  | -1.623205 |
| 8 | -0.439654 | -1.542182 | -1.948486 | 8 | 0.672241  | 1.616373  | -1.783447 |
| 6 | -0.409184 | 0.681051  | -0.336543 | 6 | -0.229219 | -0.468581 | -0.269816 |
| 6 | 0.301568  | 1.695494  | 0.381311  | 6 | -1.272973 | -1.172954 | 0.412241  |
| 8 | 0.452823  | 1.747203  | 1.591311  | 8 | -1.436234 | -1.232623 | 1.620080  |
| 7 | -1.153894 | -0.240703 | 0.464719  | 7 | 0.825816  | 0.040513  | 0.551298  |
| 6 | -0.418342 | -1.088492 | 1.403833  | 6 | 0.481301  | 1.015628  | 1.587345  |
| 6 | -1.044491 | -1.095702 | 2.780283  | 6 | 1.110340  | 0.677050  | 2.920047  |
| 6 | -2.429729 | -0.436693 | 0.205370  | 6 | 2.073612  | -0.195995 | 0.206883  |
| 7 | -3.275557 | 0.550240  | -0.145448 | 7 | 3.114359  | 0.656257  | 0.321915  |
| 6 | -4.538452 | -0.003132 | -0.599687 | 6 | 4.348741  | -0.024872 | -0.058927 |
| 6 | -4.508244 | -1.401615 | 0.034768  | 6 | 3.827649  | -1.231522 | -0.850600 |
| 7 | -3.083026 | -1.613815 | 0.261538  | 7 | 2.490960  | -1.371158 | -0.303508 |
| 6 | -3.085679 | 1.938933  | 0.179582  | 6 | 2.991243  | 2.095284  | 0.236365  |
| 6 | -2.460002 | -2.898122 | 0.030300  | 6 | 1.841044  | -2.636284 | -0.094153 |
| 6 | -5.309291 | -1.511955 | 1.316656  | 6 | 3.792774  | -1.007798 | -2.350589 |
| 6 | -4.631537 | -0.022351 | -2.113367 | 6 | 5.182172  | -0.399893 | 1.150049  |
| 8 | 0.844852  | 2.592594  | -0.473073 | 8 | -2.116332 | -1.743903 | -0.478544 |
| 6 | 1.540387  | 3.754971  | 0.007257  | 6 | -3.212010 | -2.566785 | -0.048585 |
| 6 | 2.794045  | 3.365865  | 0.773223  | 6 | -2.700590 | -3.768495 | 0.730292  |
| 6 | 1.911877  | 4.485875  | -1.270502 | 6 | -4.216182 | -1.763536 | 0.761586  |
| 6 | 0.616162  | 4.617059  | 0.852324  | 6 | -3.835880 | -3.020100 | -1.356363 |
| 1 | -2.164249 | -3.378868 | 0.962410  | 1 | 2.890227  | 2.552379  | 1.220211  |
| 1 | -3.181702 | -3.541728 | -0.466214 | 1 | 3.894502  | 2.486752  | -0.223888 |
| 1 | -1.600275 | -2.766218 | -0.624184 | 1 | 2.139790  | 2.343470  | -0.394834 |
| 1 | -2.748273 | 2.523399  | -0.675190 | 1 | 1.287782  | -2.972080 | -0.970431 |
| 1 | -4.030293 | 2.347285  | 0.534841  | 1 | 2.595692  | -3.381698 | 0.151991  |
| 1 | -2.347321 | 2.027728  | 0.971183  | 1 | 1.149046  | -2.553887 | 0.738537  |
| 1 | -4.854035 | -2.143672 | -0.683507 | 1 | 4.916447  | 0.634804  | -0.713034 |
| 1 | -5.351287 | 0.586858  | -0.176754 | 1 | 4.403179  | -2.124410 | -0.608091 |
| 1 | -4.565772 | 0.986168  | -2.517471 | 1 | 3.348298  | -1.862864 | -2.856765 |
| 1 | -3.813620 | -0.607990 | -2.531563 | 1 | 3.190814  | -0.129498 | -2.581890 |
| 1 | -5.576970 | -0.456262 | -2.437525 | 1 | 4.798014  | -0.865065 | -2.746147 |
| 1 | -6.372472 | -1.377415 | 1.120034  | 1 | 6.111174  | -0.880876 | 0.845407  |
| 1 | -5.170244 | -2.488913 | 1.775962  | 1 | 5.432209  | 0.483326  | 1.734889  |
| 1 | -4.991619 | -0.753774 | 2.031303  | 1 | 4.631949  | -1.086259 | 1.792457  |
| 1 | -0.953340 | 1.016758  | -1.201902 | 1 | 0.131558  | -0.937852 | -1.167457 |
| 1 | 0.569113  | -0.649951 | 1.462703  | 1 | -0.595641 | 0.964725  | 1.675525  |
| 1 | -0.300448 | -2.091609 | 1.005274  | 1 | 0.728169  | 2.021924  | 1.263815  |
| 1 | 0.605186  | 0.116886  | -2.464115 | 1 | -0.977523 | 0.566548  | -2.320913 |
| 1 | 1.174396  | -3.191371 | -0.995905 | 1 | -0.102112 | 3.735645  | -0.704446 |
| 1 | 3.336891  | -3.946103 | -0.014503 | 1 | -1.736996 | 5.250341  | 0.393087  |

|                                         |           |           |           |                                         |           |           |           |
|-----------------------------------------|-----------|-----------|-----------|-----------------------------------------|-----------|-----------|-----------|
| 17                                      | 5.703831  | -2.505287 | 0.582275  | 1                                       | -4.058159 | 4.490754  | 0.754667  |
| 1                                       | 4.827067  | 0.044549  | -0.292614 | 1                                       | -4.741099 | 2.234693  | 0.017197  |
| 1                                       | 2.662945  | 0.781251  | -1.250445 | 1                                       | -3.092492 | 0.736311  | -1.055420 |
| 1                                       | -0.440448 | -1.701876 | 3.453368  | 1                                       | 0.799478  | 1.405725  | 3.666962  |
| 1                                       | -1.077408 | -0.080747 | 3.169104  | 1                                       | 0.775081  | -0.306422 | 3.240926  |
| 1                                       | -2.052887 | -1.508331 | 2.774578  | 1                                       | 2.199106  | 0.685329  | 2.877829  |
| 1                                       | 3.349517  | 4.262548  | 1.046476  | 1                                       | -5.083535 | -2.382904 | 0.988701  |
| 1                                       | 2.542436  | 2.815840  | 1.673283  | 1                                       | -3.774108 | -1.415828 | 1.688706  |
| 1                                       | 3.440508  | 2.747186  | 0.152496  | 1                                       | -4.558579 | -0.901465 | 0.191056  |
| 1                                       | 2.454528  | 5.401073  | -1.039798 | 1                                       | -4.693507 | -3.662875 | -1.164762 |
| 1                                       | 2.542688  | 3.859903  | -1.899152 | 1                                       | -4.169792 | -2.162332 | -1.937429 |
| 1                                       | 1.018466  | 4.745123  | -1.835782 | 1                                       | -3.113058 | -3.574334 | -1.952521 |
| 1                                       | 1.112043  | 5.554350  | 1.101843  | 1                                       | -3.523571 | -4.451022 | 0.939422  |
| 1                                       | -0.289945 | 4.853083  | 0.294759  | 1                                       | -1.957254 | -4.306644 | 0.142562  |
| 1                                       | 0.344649  | 4.107612  | 1.770937  | 1                                       | -2.253191 | -3.458735 | 1.668979  |
| NImag = 1 (-131.9859 cm <sup>-1</sup> ) |           |           |           | NImag = 1 (-148.6753 cm <sup>-1</sup> ) |           |           |           |
| <b>TS2(Me)re-si</b>                     |           |           |           | <b>TS2(OMe)re-si</b>                    |           |           |           |
| Et = -1288.2768028                      |           |           |           | Et = -1363.4519898                      |           |           |           |
| Gsol = -1288.575057                     |           |           |           | Gsol = -1363.774490                     |           |           |           |
| 7                                       | -2.941922 | 0.936152  | -0.222847 | 6                                       | 1.999874  | -2.329511 | -0.873388 |
| 6                                       | -2.261940 | -0.137724 | 0.224410  | 6                                       | 1.763729  | -0.994302 | -1.151792 |
| 7                                       | -3.086838 | -1.201941 | 0.321168  | 6                                       | 2.795969  | -0.082105 | -0.941221 |
| 6                                       | -4.450940 | -0.795680 | -0.005213 | 6                                       | 4.010964  | -0.488956 | -0.438812 |
| 6                                       | -4.231369 | 0.528963  | -0.748084 | 6                                       | 4.229597  | -1.834119 | -0.144410 |
| 7                                       | -0.983345 | -0.105899 | 0.534437  | 6                                       | 3.219040  | -2.759164 | -0.367509 |
| 6                                       | -0.406772 | -1.018174 | 1.523512  | 6                                       | 0.463689  | -0.573318 | -1.746850 |
| 6                                       | -1.034249 | -0.844873 | 2.888532  | 8                                       | -0.460659 | -1.382819 | -1.918078 |
| 6                                       | -2.655316 | -2.574456 | 0.168769  | 8                                       | 5.451859  | -2.138223 | 0.343392  |
| 6                                       | -5.313626 | -0.667443 | 1.234140  | 6                                       | -0.430448 | 0.760230  | -0.280801 |
| 6                                       | -4.195266 | 0.382698  | -2.257666 | 6                                       | 0.249945  | 1.808496  | 0.425118  |
| 6                                       | -2.580393 | 2.303912  | 0.031406  | 8                                       | 0.444032  | 1.862743  | 1.627877  |
| 6                                       | -0.088062 | 0.651765  | -0.285857 | 7                                       | -1.116263 | -0.196201 | 0.534964  |
| 6                                       | 0.798478  | 1.539029  | 0.408145  | 6                                       | -0.325690 | -0.984763 | 1.480817  |
| 8                                       | 1.476196  | 2.311118  | -0.471489 | 6                                       | -0.961203 | -1.030956 | 2.852214  |
| 6                                       | 2.382649  | 3.332305  | -0.025183 | 6                                       | -2.359022 | -0.510932 | 0.236762  |
| 6                                       | 2.864075  | 3.955799  | -1.323098 | 7                                       | -3.274066 | 0.392680  | -0.165002 |
| 8                                       | 0.975611  | 1.587434  | 1.614235  | 6                                       | -4.446505 | -0.281694 | -0.689565 |
| 6                                       | 1.646001  | 4.367812  | 0.809986  | 6                                       | -4.344219 | -1.643807 | 0.009157  |
| 6                                       | 3.553573  | 2.732548  | 0.735475  | 7                                       | -2.917993 | -1.737397 | 0.308418  |
| 6                                       | 0.513080  | -0.912981 | -1.706144 | 6                                       | -3.224663 | 1.799511  | 0.124716  |
| 8                                       | -0.561883 | -1.507973 | -1.858677 | 6                                       | -2.186513 | -2.968757 | 0.102682  |
| 6                                       | 1.686720  | -1.571670 | -1.064611 | 6                                       | -5.191174 | -1.756432 | 1.260901  |
| 6                                       | 2.891411  | -0.896458 | -0.897733 | 6                                       | -4.405674 | -0.368554 | -2.203714 |
| 6                                       | 3.986687  | -1.535426 | -0.352012 | 8                                       | 0.709422  | 2.737897  | -0.442752 |
| 6                                       | 3.919414  | -2.873322 | 0.034596  | 6                                       | 1.364332  | 3.931485  | 0.017328  |

|                                                                  |           |           |           |                                                                   |           |           |           |
|------------------------------------------------------------------|-----------|-----------|-----------|-------------------------------------------------------------------|-----------|-----------|-----------|
| 6                                                                | 2.719996  | -3.547457 | -0.154394 | 6                                                                 | 2.667004  | 3.602781  | 0.727425  |
| 6                                                                | 1.618993  | -2.908148 | -0.701085 | 6                                                                 | 1.643606  | 4.687401  | -1.269355 |
| 1                                                                | -2.435727 | -3.038793 | 1.129631  | 6                                                                 | 0.432728  | 4.739515  | 0.906784  |
| 1                                                                | -3.461471 | -3.134373 | -0.297807 | 1                                                                 | -1.841478 | -3.396375 | 1.043582  |
| 1                                                                | -1.784749 | -2.603099 | -0.484158 | 1                                                                 | -2.854501 | -3.686089 | -0.366694 |
| 1                                                                | -2.160864 | 2.794426  | -0.846205 | 1                                                                 | -1.349951 | -2.776146 | -0.567161 |
| 1                                                                | -3.468269 | 2.849312  | 0.347960  | 1                                                                 | -2.932063 | 2.394153  | -0.739979 |
| 1                                                                | -1.846302 | 2.340246  | 0.830397  | 1                                                                 | -4.209312 | 2.124466  | 0.457415  |
| 1                                                                | -4.876514 | -1.536565 | -0.679921 | 1                                                                 | -2.510936 | 1.978576  | 0.923232  |
| 1                                                                | -4.980758 | 1.262039  | -0.450613 | 1                                                                 | -4.601019 | -2.440307 | -0.687150 |
| 1                                                                | -3.963928 | 1.335204  | -2.731154 | 1                                                                 | -5.337531 | 0.250874  | -0.358210 |
| 1                                                                | -3.424040 | -0.331652 | -2.544300 | 1                                                                 | -4.414182 | 0.625704  | -2.646938 |
| 1                                                                | -5.157262 | 0.040195  | -2.637984 | 1                                                                 | -3.493243 | -0.871452 | -2.522955 |
| 1                                                                | -6.333927 | -0.392583 | 0.968315  | 1                                                                 | -5.267237 | -0.916024 | -2.585048 |
| 1                                                                | -5.346087 | -1.608428 | 1.780182  | 1                                                                 | -6.251967 | -1.712043 | 1.015965  |
| 1                                                                | -4.912373 | 0.095806  | 1.899773  | 1                                                                 | -4.999404 | -2.697837 | 1.772470  |
| 1                                                                | -0.572526 | 1.073612  | -1.148367 | 1                                                                 | -4.960975 | -0.944676 | 1.949783  |
| 1                                                                | 0.641836  | -0.757370 | 1.572232  | 1                                                                 | -1.023414 | 1.090167  | -1.115230 |
| 1                                                                | -0.463526 | -2.045481 | 1.178234  | 1                                                                 | 0.627433  | -0.477073 | 1.544096  |
| 1                                                                | 0.802575  | -0.104620 | -2.390419 | 1                                                                 | -0.133067 | -1.977472 | 1.086462  |
| 1                                                                | 0.695625  | -3.441533 | -0.872886 | 1                                                                 | 0.564792  | 0.298681  | -2.406792 |
| 1                                                                | 2.650743  | -4.591733 | 0.120341  | 1                                                                 | 1.213921  | -3.041843 | -1.077190 |
| 1                                                                | 4.913538  | -0.992270 | -0.221986 | 1                                                                 | 3.371800  | -3.807909 | -0.166537 |
| 1                                                                | 2.953484  | 0.143324  | -1.187414 | 1                                                                 | 4.813174  | 0.211763  | -0.262901 |
| 1                                                                | -0.553379 | -1.513741 | 3.600603  | 1                                                                 | 2.625403  | 0.961871  | -1.163785 |
| 1                                                                | -0.889807 | 0.178169  | 3.227199  | 1                                                                 | -0.323378 | -1.592686 | 3.532800  |
| 1                                                                | -2.099992 | -1.072184 | 2.884470  | 1                                                                 | -1.066908 | -0.019801 | 3.238213  |
| 1                                                                | 4.272953  | 3.514789  | 0.976633  | 1                                                                 | -1.939559 | -1.510475 | 2.838895  |
| 1                                                                | 3.216900  | 2.262625  | 1.652860  | 1                                                                 | 3.182275  | 4.525550  | 0.992683  |
| 1                                                                | 4.059624  | 1.986843  | 0.124235  | 1                                                                 | 2.480536  | 3.028223  | 1.627992  |
| 1                                                                | 3.566480  | 4.762129  | -1.118741 | 1                                                                 | 3.321814  | 3.029006  | 0.073285  |
| 1                                                                | 3.362084  | 3.211736  | -1.942210 | 1                                                                 | 2.152100  | 5.625937  | -1.055055 |
| 1                                                                | 2.025246  | 4.360790  | -1.886400 | 1                                                                 | 2.274366  | 4.095164  | -1.929771 |
| 1                                                                | 2.308685  | 5.203933  | 1.030252  | 1                                                                 | 0.714735  | 4.907264  | -1.792646 |
| 1                                                                | 0.789137  | 4.752536  | 0.257486  | 1                                                                 | 0.884929  | 5.704088  | 1.134554  |
| 1                                                                | 1.300392  | 3.936983  | 1.743892  | 1                                                                 | -0.510462 | 4.922069  | 0.392377  |
| 6                                                                | 5.111990  | -3.555330 | 0.634135  | 1                                                                 | 0.233364  | 4.215929  | 1.835844  |
| 1                                                                | 4.925336  | -4.615630 | 0.791147  | 6                                                                 | 5.721852  | -3.473338 | 0.652137  |
| 1                                                                | 5.987752  | -3.462638 | -0.008067 | 1                                                                 | 6.739435  | -3.498661 | 1.027783  |
| 1                                                                | 5.373635  | -3.118945 | 1.598759  | 1                                                                 | 5.047522  | -3.852434 | 1.422145  |
|                                                                  |           |           |           | 1                                                                 | 5.650698  | -4.112792 | -0.229457 |
| NImag = 1 (-156.4183 cm <sup>-1</sup> )                          |           |           |           | NImag = 1 (-175.7323 cm <sup>-1</sup> )                           |           |           |           |
| <b>TS2(OH)re-si</b><br>Et = -1324.1563352<br>Gsol = -1324.486087 |           |           |           | <b>TS3(NO2)si-si</b><br>Et = -1453.3790274<br>Gsol = -1453.732059 |           |           |           |

|   |           |           |           |   |           |           |           |
|---|-----------|-----------|-----------|---|-----------|-----------|-----------|
| 7 | -2.923359 | 0.965123  | -0.235749 | 6 | 2.917926  | 0.014934  | -1.180132 |
| 6 | -2.258035 | -0.113807 | 0.220680  | 6 | 2.121117  | -1.118550 | -1.296446 |
| 7 | -3.095105 | -1.168305 | 0.317358  | 6 | 2.510976  | -2.306258 | -0.685332 |
| 6 | -4.452252 | -0.749245 | -0.021809 | 6 | 3.678210  | -2.364460 | 0.048789  |
| 6 | -4.212943 | 0.569514  | -0.769166 | 6 | 4.449688  | -1.219639 | 0.153482  |
| 7 | -0.981304 | -0.093488 | 0.539557  | 6 | 4.089299  | -0.027401 | -0.452148 |
| 6 | -0.420197 | -1.007398 | 1.535452  | 6 | 0.889684  | -1.102263 | -2.127611 |
| 6 | -1.057522 | -0.825713 | 2.894843  | 8 | 0.163215  | -2.073002 | -2.236338 |
| 6 | -2.676816 | -2.545912 | 0.174583  | 7 | 5.679474  | -1.272190 | 0.921904  |
| 6 | -5.323431 | -0.606129 | 1.209946  | 6 | -0.472652 | 0.254782  | -0.528698 |
| 6 | -4.166356 | 0.415639  | -2.277722 | 6 | -0.466142 | 1.660382  | -0.374582 |
| 6 | -2.546579 | 2.330122  | 0.010479  | 8 | 0.706776  | 2.105872  | 0.140801  |
| 6 | -0.071822 | 0.644100  | -0.284596 | 6 | 0.934832  | 3.500953  | 0.376391  |
| 6 | 0.819887  | 1.528898  | 0.409115  | 6 | 0.907874  | 4.282079  | -0.927588 |
| 8 | 1.513723  | 2.283928  | -0.471920 | 7 | -1.760116 | -0.272741 | -0.914485 |
| 6 | 2.426364  | 3.301584  | -0.028109 | 6 | -2.228468 | -0.048172 | -2.280130 |
| 6 | 2.923818  | 3.907425  | -1.328279 | 6 | -3.086664 | -1.179129 | -2.804868 |
| 8 | 0.986898  | 1.586453  | 1.615884  | 6 | -2.622330 | -0.576752 | 0.052929  |
| 6 | 1.692138  | 4.351727  | 0.790589  | 7 | -3.876865 | -0.128290 | 0.170106  |
| 6 | 3.585231  | 2.698756  | 0.748207  | 6 | -4.559198 | -0.798299 | 1.270240  |
| 6 | 0.523240  | -0.923453 | -1.673983 | 6 | -3.391587 | -1.445865 | 2.037492  |
| 8 | -0.555407 | -1.514884 | -1.831898 | 7 | -2.333510 | -1.423018 | 1.043340  |
| 6 | 1.689165  | -1.594110 | -1.032483 | 6 | -4.346791 | 1.115881  | -0.397635 |
| 6 | 2.901512  | -0.933441 | -0.856307 | 6 | -1.214049 | -2.325342 | 1.056312  |
| 6 | 3.994359  | -1.576537 | -0.313754 | 6 | -3.001136 | -0.709947 | 3.304068  |
| 6 | 3.892962  | -2.913663 | 0.053993  | 6 | -5.596549 | -1.787220 | 0.778594  |
| 6 | 2.697059  | -3.592258 | -0.132366 | 8 | -1.371454 | 2.425869  | -0.708021 |
| 6 | 1.608701  | -2.931994 | -0.677293 | 6 | -0.068591 | 4.049662  | 1.379167  |
| 1 | -2.470367 | -3.007961 | 1.139526  | 6 | 2.330136  | 3.530241  | 0.974970  |
| 1 | -3.484920 | -3.099431 | -0.296288 | 1 | -4.904868 | 0.954968  | -1.319281 |
| 1 | -1.801022 | -2.585526 | -0.470990 | 1 | -5.004914 | 1.593536  | 0.324572  |
| 1 | -2.116887 | 2.809266  | -0.868537 | 1 | -3.493996 | 1.767421  | -0.580683 |
| 1 | -3.429240 | 2.888507  | 0.318830  | 1 | -1.551852 | -3.300676 | 1.402936  |
| 1 | -1.815932 | 2.362957  | 0.812820  | 1 | -0.825343 | -2.422013 | 0.045432  |
| 1 | -4.880161 | -1.488850 | -0.696440 | 1 | -0.418676 | -1.973997 | 1.712046  |
| 1 | -4.956729 | 1.311901  | -0.480879 | 1 | -5.034791 | -0.039050 | 1.890384  |
| 1 | -3.921342 | 1.363405  | -2.753838 | 1 | -3.625891 | -2.485609 | 2.267202  |
| 1 | -3.400227 | -0.307990 | -2.554688 | 1 | -2.122653 | -1.160177 | 3.762181  |
| 1 | -5.128784 | 0.081354  | -2.664197 | 1 | -2.772065 | 0.331559  | 3.083414  |
| 1 | -6.338602 | -0.321781 | 0.934642  | 1 | -3.813094 | -0.742094 | 4.029468  |
| 1 | -5.370331 | -1.544144 | 1.760051  | 1 | -6.100993 | -2.262078 | 1.619222  |
| 1 | -4.919498 | 0.155954  | 1.875285  | 1 | -6.349511 | -1.289547 | 0.170272  |
| 1 | -0.550713 | 1.070296  | -1.148298 | 1 | -5.128404 | -2.562659 | 0.173907  |
| 1 | 0.629826  | -0.753937 | 1.592645  | 1 | 0.113401  | -0.340951 | 0.147095  |
| 1 | -0.481721 | -2.035256 | 1.192240  | 1 | -1.321695 | 0.012499  | -2.868275 |
| 1 | 0.824267  | -0.126714 | -2.367110 | 1 | -2.720064 | 0.917323  | -2.375282 |

|                                                                  |           |           |           |                                                                     |           |           |           |
|------------------------------------------------------------------|-----------|-----------|-----------|---------------------------------------------------------------------|-----------|-----------|-----------|
| 1                                                                | 0.680385  | -3.454776 | -0.853917 | 1                                                                   | -3.360426 | -0.979103 | -3.839746 |
| 1                                                                | 2.622710  | -4.639162 | 0.135084  | 1                                                                   | -2.526308 | -2.110259 | -2.771877 |
| 1                                                                | 4.934605  | -1.066962 | -0.167167 | 1                                                                   | -4.011341 | -1.298645 | -2.240607 |
| 1                                                                | 2.974810  | 0.107455  | -1.138644 | 1                                                                   | 0.811112  | -0.242009 | -2.802773 |
| 1                                                                | -0.587507 | -1.495910 | 3.612889  | 1                                                                   | 1.888998  | -3.178854 | -0.813865 |
| 1                                                                | -0.908252 | 0.197191  | 3.231877  | 1                                                                   | 4.006632  | -3.271195 | 0.529038  |
| 1                                                                | -2.124889 | -1.044842 | 2.882745  | 1                                                                   | 4.722161  | 0.836894  | -0.340002 |
| 1                                                                | 4.308131  | 3.477451  | 0.990088  | 1                                                                   | 2.598047  | 0.937876  | -1.639055 |
| 1                                                                | 3.236812  | 2.238741  | 1.666222  | 1                                                                   | 2.620421  | 4.552228  | 1.213047  |
| 1                                                                | 4.092262  | 1.944729  | 0.148130  | 1                                                                   | 2.367076  | 2.937003  | 1.886681  |
| 1                                                                | 3.632876  | 4.708462  | -1.126239 | 1                                                                   | 3.055844  | 3.121005  | 0.274561  |
| 1                                                                | 3.419046  | 3.152393  | -1.936203 | 1                                                                   | 1.191577  | 5.318502  | -0.746082 |
| 1                                                                | 2.093512  | 4.315397  | -1.901953 | 1                                                                   | 1.620514  | 3.856877  | -1.633902 |
| 1                                                                | 2.360309  | 5.184457  | 1.006922  | 1                                                                   | -0.082281 | 4.253761  | -1.369246 |
| 1                                                                | 0.842616  | 4.737791  | 0.227769  | 1                                                                   | 0.193816  | 5.073468  | 1.644168  |
| 1                                                                | 1.336207  | 3.933791  | 1.726468  | 1                                                                   | -1.070846 | 4.035209  | 0.964944  |
| 8                                                                | 4.991597  | -3.502823 | 0.579209  | 1                                                                   | -0.051528 | 3.449808  | 2.288734  |
| 1                                                                | 4.791736  | -4.417566 | 0.780670  | 8                                                                   | 6.351391  | -0.267910 | 0.978723  |
|                                                                  |           |           |           | 8                                                                   | 5.960767  | -2.317710 | 1.462550  |
| NImag = 1 (-171.3199 cm <sup>-1</sup> )                          |           |           |           | NImag = 1 (-59.9980 cm <sup>-1</sup> )                              |           |           |           |
| <b>TS3(CN)si-si</b><br>Et = -1341.1670491<br>Gsol = -1341.483717 |           |           |           | <b>TS3(COOMe)si-si</b><br>Et = -1476.7637336<br>Gsol = -1477.116683 |           |           |           |
| 7                                                                | -3.612605 | -0.028343 | 0.146934  | 6                                                                   | -2.557392 | 0.458006  | 1.370570  |
| 6                                                                | -2.368069 | -0.506430 | 0.036316  | 6                                                                   | -1.798427 | -0.697393 | 1.520589  |
| 7                                                                | -2.116054 | -1.388392 | 1.005676  | 6                                                                   | -2.293442 | -1.909328 | 1.051094  |
| 6                                                                | -3.195109 | -1.420593 | 1.976976  | 6                                                                   | -3.521282 | -1.966518 | 0.421096  |
| 6                                                                | -4.331018 | -0.712812 | 1.214702  | 6                                                                   | -4.272929 | -0.806078 | 0.264173  |
| 7                                                                | -1.486042 | -0.193275 | -0.907234 | 6                                                                   | -3.785672 | 0.405640  | 0.745029  |
| 6                                                                | -1.924494 | 0.080916  | -2.274466 | 6                                                                   | -0.501420 | -0.672675 | 2.247008  |
| 6                                                                | -2.813690 | -1.004936 | -2.840876 | 8                                                                   | 0.171125  | -1.680257 | 2.417490  |
| 6                                                                | -1.033157 | -2.335374 | 0.993688  | 6                                                                   | -5.594851 | -0.805227 | -0.394794 |
| 6                                                                | -2.812081 | -0.746983 | 3.279853  | 8                                                                   | -6.284407 | 0.169875  | -0.541025 |
| 6                                                                | -5.390443 | -1.653131 | 0.676848  | 8                                                                   | -5.959640 | -2.015910 | -0.822722 |
| 6                                                                | -4.031532 | 1.250333  | -0.382290 | 6                                                                   | -7.221828 | -2.072603 | -1.455962 |
| 6                                                                | -0.177759 | 0.265168  | -0.499932 | 6                                                                   | 0.781182  | 0.375371  | 0.515928  |
| 6                                                                | -0.110377 | 1.673034  | -0.350637 | 6                                                                   | 0.856376  | 1.763937  | 0.224766  |
| 8                                                                | -0.972795 | 2.476305  | -0.703931 | 8                                                                   | -0.300935 | 2.229848  | -0.298819 |
| 8                                                                | 1.071922  | 2.067205  | 0.183731  | 6                                                                   | -0.467618 | 3.614041  | -0.631666 |
| 6                                                                | 1.358197  | 3.451974  | 0.418727  | 6                                                                   | -0.360216 | 4.485410  | 0.609330  |
| 6                                                                | 0.365465  | 4.047130  | 1.405314  | 7                                                                   | 2.067152  | -0.179429 | 0.875368  |
| 6                                                                | 2.744777  | 3.421154  | 1.037572  | 6                                                                   | 2.639365  | 0.175431  | 2.172985  |
| 6                                                                | 1.385635  | 4.229442  | -0.887362 | 6                                                                   | 3.403858  | -0.963031 | 2.813730  |
| 6                                                                | 1.125824  | -1.103300 | -2.054021 | 6                                                                   | 2.827580  | -0.708218 | -0.074285 |
| 8                                                                | 0.339694  | -2.017061 | -2.243738 | 7                                                                   | 4.113369  | -0.414004 | -0.307012 |

|   |           |           |           |   |           |           |           |
|---|-----------|-----------|-----------|---|-----------|-----------|-----------|
| 6 | 2.318302  | -1.259601 | -1.179398 | 6 | 4.664122  | -1.299742 | -1.324572 |
| 6 | 2.601582  | -2.511419 | -0.643952 | 6 | 3.397406  | -1.922519 | -1.940893 |
| 6 | 3.726018  | -2.702076 | 0.132874  | 7 | 2.399405  | -1.645363 | -0.922909 |
| 6 | 4.584460  | -1.630943 | 0.375586  | 6 | 4.716970  | 0.854764  | 0.033192  |
| 6 | 4.310565  | -0.375743 | -0.167608 | 6 | 1.217283  | -2.445713 | -0.737400 |
| 6 | 3.184045  | -0.197899 | -0.943409 | 6 | 3.017289  | -1.341406 | -3.288455 |
| 6 | 5.748257  | -1.820937 | 1.181367  | 6 | 5.624689  | -2.314446 | -0.738074 |
| 1 | -4.587698 | 1.140843  | -1.312485 | 8 | 1.818195  | 2.494314  | 0.457370  |
| 1 | -4.676400 | 1.729946  | 0.350631  | 6 | 0.529819  | 4.036060  | -1.699665 |
| 1 | -3.154199 | 1.875008  | -0.540972 | 6 | -1.878002 | 3.669387  | -1.191417 |
| 1 | -1.414962 | -3.311125 | 1.290257  | 1 | 5.330135  | 0.784009  | 0.930764  |
| 1 | -0.632188 | -2.401702 | -0.015264 | 1 | 5.350844  | 1.166953  | -0.793899 |
| 1 | -0.235778 | -2.047113 | 1.677033  | 1 | 3.933643  | 1.597222  | 0.175119  |
| 1 | -4.792780 | 0.040184  | 1.852805  | 1 | 1.463651  | -3.487385 | -0.938161 |
| 1 | -3.461126 | -2.461917 | 2.160558  | 1 | 0.880874  | -2.351400 | 0.293483  |
| 1 | -1.954028 | -1.237505 | 3.735327  | 1 | 0.413586  | -2.139676 | -1.405404 |
| 1 | -2.553516 | 0.296704  | 3.107299  | 1 | 5.177450  | -0.689555 | -2.067279 |
| 1 | -3.638821 | -0.788161 | 3.987948  | 1 | 3.514402  | -3.003536 | -2.021413 |
| 1 | -5.920750 | -2.139753 | 1.494559  | 1 | 2.072409  | -1.752749 | -3.638224 |
| 1 | -6.119442 | -1.113340 | 0.075337  | 1 | 2.910853  | -0.259757 | -3.220047 |
| 1 | -4.937027 | -2.422209 | 0.053121  | 1 | 3.780395  | -1.569686 | -4.031602 |
| 1 | 0.339472  | -0.344149 | 0.219013  | 1 | 6.029610  | -2.955087 | -1.520618 |
| 1 | -1.006257 | 0.121170  | -2.846552 | 1 | 6.457451  | -1.819438 | -0.241892 |
| 1 | -2.378962 | 1.065649  | -2.352108 | 1 | 5.116782  | -2.941412 | -0.006668 |
| 1 | -3.062967 | -0.767789 | -3.874131 | 1 | 0.168571  | -0.232055 | -0.125890 |
| 1 | -2.286438 | -1.955422 | -2.824492 | 1 | 1.781053  | 0.420162  | 2.785711  |
| 1 | -3.751337 | -1.105708 | -2.294665 | 1 | 3.233824  | 1.082921  | 2.106544  |
| 1 | 1.152943  | -0.220333 | -2.703234 | 1 | 3.762170  | -0.653568 | 3.794641  |
| 1 | 1.930564  | -3.327434 | -0.865562 | 1 | 2.744634  | -1.817844 | 2.940443  |
| 1 | 3.954185  | -3.672260 | 0.547325  | 1 | 4.273763  | -1.262499 | 2.229058  |
| 1 | 4.980780  | 0.447037  | 0.027840  | 1 | -0.350382 | 0.226685  | 2.857201  |
| 1 | 2.948616  | 0.776417  | -1.343622 | 1 | -1.704426 | -2.799990 | 1.210752  |
| 1 | 3.073514  | 4.429509  | 1.283564  | 1 | -3.910308 | -2.905376 | 0.059433  |
| 1 | 2.743729  | 2.823897  | 1.947419  | 1 | -4.388011 | 1.291629  | 0.615456  |
| 1 | 3.463209  | 2.985552  | 0.345265  | 1 | -2.165846 | 1.398803  | 1.728070  |
| 1 | 1.719100  | 5.250686  | -0.704495 | 1 | -2.128815 | 4.686099  | -1.489765 |
| 1 | 2.084043  | 3.766675  | -1.584148 | 1 | -1.968970 | 3.019423  | -2.059671 |
| 1 | 0.400738  | 4.249900  | -1.340986 | 1 | -2.599060 | 3.339054  | -0.446454 |
| 1 | 0.668792  | 5.059098  | 1.671973  | 1 | -0.594627 | 5.519516  | 0.357906  |
| 1 | -0.630232 | 4.076198  | 0.976256  | 1 | -1.072174 | 4.152699  | 1.364070  |
| 1 | 0.342141  | 3.449627  | 2.316248  | 1 | 0.640400  | 4.437172  | 1.025325  |
| 7 | 6.684720  | -1.975935 | 1.834514  | 1 | 0.305801  | 5.048035  | -2.036112 |
|   |           |           |           | 1 | 1.542530  | 4.005866  | -1.312634 |
|   |           |           |           | 1 | 0.458101  | 3.370286  | -2.559276 |
|   |           |           |           | 1 | -7.365710 | -3.109210 | -1.738066 |
|   |           |           |           | 1 | -8.006674 | -1.752448 | -0.776224 |

NImag = 1 (-74.5295 cm<sup>-1</sup>)

|   |                                                                  |                                        |           |                                                                |           |           |           |
|---|------------------------------------------------------------------|----------------------------------------|-----------|----------------------------------------------------------------|-----------|-----------|-----------|
|   | 1                                                                | -7.239270                              | -1.434155 | -2.334981                                                      |           |           |           |
|   |                                                                  | NImag = 1 (-82.0848 cm <sup>-1</sup> ) |           |                                                                |           |           |           |
|   | <b>TS3(Cl)si-si</b><br>Et = -1708.5662024<br>Gsol = -1708.885027 |                                        |           | <b>TS3(H)si-si</b><br>Et = -1248.959832<br>Gsol = -1249.254991 |           |           |           |
| 6 | -2.486794                                                        | -2.398828                              | 0.707302  | 7                                                              | 2.190634  | -0.936345 | -1.019150 |
| 6 | -2.190745                                                        | -1.131602                              | 1.193278  | 6                                                              | 2.140120  | -0.130743 | 0.044947  |
| 6 | -3.078145                                                        | -0.090093                              | 0.953687  | 7                                                              | 3.275187  | 0.577096  | 0.155984  |
| 6 | -4.233194                                                        | -0.300323                              | 0.224214  | 6                                                              | 4.246766  | 0.139544  | -0.837949 |
| 6 | -4.501639                                                        | -1.569893                              | -0.262026 | 6                                                              | 3.375512  | -0.669525 | -1.816303 |
| 6 | -3.638340                                                        | -2.625963                              | -0.024693 | 7                                                              | 1.113949  | -0.065495 | 0.876313  |
| 6 | -0.969095                                                        | -0.939383                              | 2.020064  | 6                                                              | 1.330033  | 0.149732  | 2.307785  |
| 8 | -0.181004                                                        | -1.855786                              | 2.226593  | 6                                                              | 2.306289  | -0.835485 | 2.914355  |
| 6 | 0.274094                                                         | 0.340651                               | 0.481165  | 6                                                              | 3.337800  | 1.875788  | 0.787342  |
| 6 | 0.202698                                                         | 1.751318                               | 0.306550  | 6                                                              | 5.376416  | -0.658259 | -0.218768 |
| 8 | -0.973871                                                        | 2.129314                               | -0.246907 | 6                                                              | 3.046215  | 0.063694  | -3.101609 |
| 6 | -1.269695                                                        | 3.509107                               | -0.499594 | 6                                                              | 1.357042  | -2.095234 | -1.217035 |
| 6 | -2.648502                                                        | 3.458866                               | -1.134263 | 6                                                              | -0.232992 | 0.062635  | 0.363526  |
| 7 | 1.596727                                                         | -0.084989                              | 0.882435  | 6                                                              | -0.664583 | 1.421215  | 0.365064  |
| 6 | 2.048160                                                         | 0.248430                               | 2.233445  | 8                                                              | -0.108271 | 2.348283  | 0.947728  |
| 6 | 2.885949                                                         | -0.841921                              | 2.865817  | 8                                                              | -1.821886 | 1.578069  | -0.315767 |
| 6 | 2.456162                                                         | -0.504920                              | -0.033120 | 6                                                              | -2.468131 | 2.853492  | -0.407696 |
| 7 | 2.166744                                                         | -1.429707                              | -0.952088 | 6                                                              | -2.897035 | 3.342744  | 0.966193  |
| 6 | 3.253259                                                         | -1.573488                              | -1.905197 | 6                                                              | -1.573624 | 3.865152  | -1.108048 |
| 6 | 4.417265                                                         | -0.878664                              | -1.174307 | 6                                                              | -3.687138 | 2.562499  | -1.265380 |
| 7 | 3.724719                                                         | -0.092526                              | -0.161440 | 6                                                              | -1.213340 | -1.684177 | 1.525433  |
| 6 | 1.064511                                                         | -2.353360                              | -0.867964 | 8                                                              | -0.248284 | -2.438034 | 1.629741  |
| 6 | 4.184042                                                         | 1.208265                               | 0.269808  | 6                                                              | -2.338279 | -1.966789 | 0.593444  |
| 6 | 5.420264                                                         | -1.837292                              | -0.564889 | 6                                                              | -3.459699 | -1.147707 | 0.554496  |
| 6 | 2.917565                                                         | -0.963667                              | -3.251793 | 6                                                              | -4.524323 | -1.458199 | -0.272606 |
| 8 | 1.058079                                                         | 2.561680                               | 0.654546  | 6                                                              | -4.478346 | -2.593709 | -1.068545 |
| 6 | -1.319403                                                        | 4.299186                               | 0.798216  | 6                                                              | -3.365851 | -3.420712 | -1.026166 |
| 6 | -0.270621                                                        | 4.103351                               | -1.480315 | 6                                                              | -2.303665 | -3.111090 | -0.194233 |
| 1 | 4.744452                                                         | 1.151859                               | 1.202182  | 1                                                              | 3.792454  | 1.825679  | 1.775947  |
| 1 | 4.834584                                                         | 1.618064                               | -0.499822 | 1                                                              | 3.938498  | 2.535594  | 0.164807  |
| 1 | 3.327280                                                         | 1.868080                               | 0.393235  | 1                                                              | 2.333205  | 2.286851  | 0.866115  |
| 1 | 1.427800                                                         | -3.354626                              | -1.095504 | 1                                                              | 1.987593  | -2.932117 | -1.514463 |
| 1 | 0.666105                                                         | -2.341494                              | 0.145389  | 1                                                              | 0.855946  | -2.342041 | -0.281420 |
| 1 | 0.270944                                                         | -2.100857                              | -1.569481 | 1                                                              | 0.610335  | -1.926776 | -1.991595 |
| 1 | 4.924879                                                         | -0.192604                              | -1.851907 | 1                                                              | 4.646156  | 1.021693  | -1.337657 |
| 1 | 3.467603                                                         | -2.636046                              | -2.022087 | 1                                                              | 3.855655  | -1.621386 | -2.044206 |
| 1 | 2.036010                                                         | -1.433852                              | -3.683127 | 1                                                              | 2.357966  | -0.515277 | -3.714240 |
| 1 | 2.716363                                                         | 0.101626                               | -3.148181 | 1                                                              | 2.579466  | 1.023182  | -2.883505 |
| 1 | 3.745220                                                         | -1.094927                              | -3.947865 | 1                                                              | 3.950022  | 0.240744  | -3.683497 |
| 1 | 5.933390                                                         | -2.401042                              | -1.343165 | 1                                                              | 6.092461  | -0.964015 | -0.980788 |

|                                         |           |           |           |                                         |           |           |           |
|-----------------------------------------|-----------|-----------|-----------|-----------------------------------------|-----------|-----------|-----------|
| 1                                       | 6.169661  | -1.299349 | 0.012773  | 1                                       | 5.906328  | -0.067238 | 0.525938  |
| 1                                       | 4.920011  | -2.541112 | 0.098738  | 1                                       | 4.988463  | -1.551294 | 0.269004  |
| 1                                       | -0.202766 | -0.266005 | -0.267952 | 1                                       | -0.444098 | -0.505763 | -0.524838 |
| 1                                       | 1.132331  | 0.367305  | 2.798797  | 1                                       | 0.352332  | 0.007607  | 2.750512  |
| 1                                       | 2.546314  | 1.214180  | 2.254194  | 1                                       | 1.605580  | 1.180342  | 2.513016  |
| 1                                       | 3.141218  | -0.556374 | 3.885453  | 1                                       | 2.382571  | -0.656774 | 3.986261  |
| 1                                       | 2.314184  | -1.765537 | 2.898651  | 1                                       | 1.943188  | -1.847124 | 2.754486  |
| 1                                       | 3.820648  | -1.013667 | 2.332083  | 1                                       | 3.308131  | -0.738597 | 2.496053  |
| 1                                       | -1.005991 | -0.059454 | 2.674028  | 1                                       | -1.478563 | -0.990447 | 2.334199  |
| 1                                       | -1.805873 | -3.206193 | 0.931951  | 1                                       | -1.441132 | -3.756865 | -0.120092 |
| 1                                       | -3.875489 | -3.609791 | -0.399160 | 1                                       | -3.334331 | -4.314722 | -1.632953 |
| 17                                      | -5.949103 | -1.842382 | -1.177907 | 1                                       | -5.310988 | -2.837141 | -1.712868 |
| 1                                       | -4.921039 | 0.507304  | 0.028134  | 1                                       | -5.393231 | -0.816178 | -0.298111 |
| 1                                       | -2.844854 | 0.899323  | 1.317436  | 1                                       | -3.484502 | -0.256948 | 1.165571  |
| 1                                       | -2.984387 | 4.461988  | -1.392047 | 1                                       | -4.277197 | 3.466760  | -1.406576 |
| 1                                       | -2.630193 | 2.854318  | -2.039066 | 1                                       | -3.384558 | 2.187564  | -2.241374 |
| 1                                       | -3.370071 | 3.019989  | -0.447583 | 1                                       | -4.312659 | 1.807400  | -0.793828 |
| 1                                       | -1.659544 | 5.315512  | 0.600808  | 1                                       | -3.476194 | 4.260721  | 0.868922  |
| 1                                       | -2.021911 | 3.837353  | 1.491397  | 1                                       | -3.526429 | 2.596858  | 1.450635  |
| 1                                       | -0.340230 | 4.333853  | 1.263363  | 1                                       | -2.031554 | 3.531803  | 1.592197  |
| 1                                       | -0.580449 | 5.109670  | -1.760665 | 1                                       | -2.130530 | 4.782701  | -1.296512 |
| 1                                       | 0.719776  | 4.146237  | -1.040316 | 1                                       | -0.703348 | 4.095381  | -0.503200 |
| 1                                       | -0.230973 | 3.496979  | -2.384774 | 1                                       | -1.243016 | 3.467281  | -2.067066 |
| NImag = 1 (-100.4451 cm <sup>-1</sup> ) |           |           |           | NImag = 1 (-114.4085 cm <sup>-1</sup> ) |           |           |           |
| <b>TS3(Me)si-si</b>                     |           |           |           | <b>TS3(OMe)si-si</b>                    |           |           |           |
| Et = -1288.2700715                      |           |           |           | Et = -1363.4453923                      |           |           |           |
| Gsol = -1288.570121                     |           |           |           | Gsol = -1363.769089                     |           |           |           |
| 6                                       | 2.410690  | -2.719925 | -0.321349 | 6                                       | 2.519634  | -2.257250 | -0.574784 |
| 6                                       | 2.270337  | -1.494603 | -0.958217 | 6                                       | 2.172521  | -1.053557 | -1.165827 |
| 6                                       | 3.298278  | -0.565341 | -0.854847 | 6                                       | 3.079093  | 0.001800  | -1.106021 |
| 6                                       | 4.429948  | -0.850264 | -0.115614 | 6                                       | 4.286747  | -0.138727 | -0.460124 |
| 6                                       | 4.570116  | -2.070144 | 0.542062  | 6                                       | 4.617738  | -1.349266 | 0.145452  |
| 6                                       | 3.543768  | -3.000026 | 0.422822  | 6                                       | 3.729053  | -2.414911 | 0.085757  |
| 6                                       | 1.073653  | -1.235855 | -1.802497 | 6                                       | 0.896983  | -0.939116 | -1.918688 |
| 8                                       | 0.193595  | -2.081551 | -1.958509 | 8                                       | 0.131207  | -1.895986 | -2.050977 |
| 6                                       | -0.024184 | 0.241567  | -0.419223 | 6                                       | -0.294485 | 0.328217  | -0.448913 |
| 6                                       | 0.246381  | 1.638220  | -0.315365 | 6                                       | -0.176142 | 1.740758  | -0.273840 |
| 8                                       | 1.418758  | 1.873415  | 0.315820  | 8                                       | 0.978405  | 2.068826  | 0.346053  |
| 6                                       | 1.920389  | 3.204238  | 0.489590  | 6                                       | 1.333493  | 3.435100  | 0.594252  |
| 6                                       | 3.218078  | 2.988141  | 1.248087  | 6                                       | 2.663440  | 3.320801  | 1.318034  |
| 7                                       | -1.379135 | -0.001169 | -0.864428 | 7                                       | -1.633586 | -0.036450 | -0.859691 |
| 6                                       | -1.717122 | 0.326853  | -2.250867 | 6                                       | -2.054876 | 0.311315  | -2.218203 |
| 6                                       | -2.610378 | -0.705854 | -2.904345 | 6                                       | -2.820044 | -0.801223 | -2.902771 |
| 6                                       | -2.327106 | -0.302489 | 0.005400  | 6                                       | -2.510618 | -0.483630 | 0.020201  |
| 7                                       | -2.196197 | -1.214236 | 0.973161  | 7                                       | -2.245073 | -1.410725 | 0.945399  |



|   |           |           |           |   |           |           |           |
|---|-----------|-----------|-----------|---|-----------|-----------|-----------|
| 6 | -3.353376 | -1.207825 | 1.851434  | 6 | -3.366567 | -1.571396 | 1.854433  |
| 6 | -4.388817 | -0.430600 | 1.017867  | 6 | -4.510843 | -0.889772 | 1.082926  |
| 7 | -3.553390 | 0.243367  | 0.032914  | 7 | -3.791446 | -0.086403 | 0.103028  |
| 6 | -1.208226 | -2.264011 | 0.988596  | 6 | -1.147627 | -2.344384 | 0.888896  |
| 6 | -3.833754 | 1.578174  | -0.443876 | 6 | -4.236205 | 1.228012  | -0.300873 |
| 6 | -5.439246 | -1.309601 | 0.369459  | 6 | -5.474730 | -1.859234 | 0.429042  |
| 6 | -3.046505 | -0.579969 | 3.196656  | 6 | -3.090801 | -0.963308 | 3.215417  |
| 8 | -0.449136 | 2.538299  | -0.777290 | 8 | -0.978394 | 2.580335  | -0.670537 |
| 6 | 2.200525  | 3.856763  | -0.854641 | 6 | 1.509337  | 4.194097  | -0.711034 |
| 6 | 0.963786  | 4.038496  | 1.327643  | 6 | 0.308310  | 4.104141  | 1.496980  |
| 1 | -4.341667 | 1.568149  | -1.407497 | 1 | -4.764805 | 1.203948  | -1.252996 |
| 1 | -4.475474 | 2.077862  | 0.278826  | 1 | -4.912051 | 1.615043  | 0.458808  |
| 1 | -2.902307 | 2.134289  | -0.528160 | 1 | -3.377731 | 1.892213  | -0.377124 |
| 1 | -1.703559 | -3.205340 | 1.223192  | 1 | -1.530324 | -3.344176 | 1.090851  |
| 1 | -0.748296 | -2.340166 | 0.003384  | 1 | -0.708288 | -2.327180 | -0.108881 |
| 1 | -0.436019 | -2.080082 | 1.733993  | 1 | -0.381138 | -2.108439 | 1.625626  |
| 1 | -4.870119 | 0.327572  | 1.635173  | 1 | -5.055286 | -0.216226 | 1.744296  |
| 1 | -3.683320 | -2.237671 | 1.989656  | 1 | -3.570498 | -2.637171 | 1.959479  |
| 1 | -2.246658 | -1.117041 | 3.702677  | 1 | -2.218754 | -1.422795 | 3.676538  |
| 1 | -2.731778 | 0.455058  | 3.070896  | 1 | -2.900913 | 0.105189  | 3.123745  |
| 1 | -3.926533 | -0.600108 | 3.838596  | 1 | -3.941642 | -1.109529 | 3.879938  |
| 1 | -6.057891 | -1.790209 | 1.126558  | 1 | -6.008942 | -2.436760 | 1.182736  |
| 1 | -6.089818 | -0.723850 | -0.277371 | 1 | -6.209027 | -1.328060 | -0.173750 |
| 1 | -4.967913 | -2.083969 | -0.234056 | 1 | -4.938492 | -2.550171 | -0.219852 |
| 1 | 0.304453  | -0.368591 | 0.403346  | 1 | 0.121842  | -0.277833 | 0.336136  |
| 1 | -0.761973 | 0.349621  | -2.760117 | 1 | -1.128718 | 0.493210  | -2.748467 |
| 1 | -2.123789 | 1.331149  | -2.328287 | 1 | -2.597129 | 1.252453  | -2.232744 |
| 1 | -2.777887 | -0.432026 | -3.945337 | 1 | -3.052359 | -0.505497 | -3.925223 |
| 1 | -2.121040 | -1.675560 | -2.873557 | 1 | -2.204396 | -1.696268 | -2.928549 |
| 1 | -3.586498 | -0.775212 | -2.424399 | 1 | -3.764064 | -1.022333 | -2.404595 |
| 1 | 1.220904  | -0.432800 | -2.536980 | 1 | 0.893507  | -0.113528 | -2.643404 |
| 1 | 1.628052  | -3.454200 | -0.443888 | 1 | 1.831896  | -3.085701 | -0.660793 |
| 1 | 3.641995  | -3.962285 | 0.907842  | 1 | 3.972743  | -3.367094 | 0.530166  |
| 6 | 5.790902  | -2.361672 | 1.361583  | 8 | 5.822136  | -1.391697 | 0.755249  |
| 1 | 5.222519  | -0.116955 | -0.046086 | 1 | 4.997908  | 0.671816  | -0.408152 |
| 1 | 3.197897  | 0.390610  | -1.348236 | 1 | 2.822609  | 0.945862  | -1.564681 |
| 1 | 3.710241  | 3.940717  | 1.438512  | 1 | 3.051278  | 4.309520  | 1.558546  |
| 1 | 3.024502  | 2.498982  | 2.200956  | 1 | 2.545995  | 2.758240  | 2.242391  |
| 1 | 3.892650  | 2.354956  | 0.675435  | 1 | 3.391278  | 2.800846  | 0.698738  |
| 1 | 2.681010  | 4.823365  | -0.705170 | 1 | 1.880648  | 5.198415  | -0.508556 |
| 1 | 2.873618  | 3.232963  | -1.441948 | 1 | 2.236779  | 3.687720  | -1.344633 |
| 1 | 1.279949  | 3.999316  | -1.410272 | 1 | 0.567592  | 4.264556  | -1.244763 |
| 1 | 1.421538  | 4.998257  | 1.566168  | 1 | 0.658484  | 5.095780  | 1.782459  |
| 1 | 0.034807  | 4.209934  | 0.794983  | 1 | -0.647248 | 4.195693  | 0.992298  |
| 1 | 0.745752  | 3.525559  | 2.263936  | 1 | 0.174649  | 3.518093  | 2.405792  |
| 1 | 5.886022  | -3.425765 | 1.568326  | 6 | 6.207542  | -2.587213 | 1.366067  |

|                                         |           |           |           |                                         |           |           |           |
|-----------------------------------------|-----------|-----------|-----------|-----------------------------------------|-----------|-----------|-----------|
| 1                                       | 6.698204  | -2.036348 | 0.854260  | 1                                       | 7.190326  | -2.408926 | 1.789863  |
| 1                                       | 5.754934  | -1.842861 | 2.320813  | 1                                       | 5.520304  | -2.870632 | 2.165230  |
| NImag = 1 (-120.9786 cm <sup>-1</sup> ) |           |           |           | NImag = 1 (-128.8882 cm <sup>-1</sup> ) |           |           |           |
| <b>TS3(OH)si-si</b>                     |           |           |           | <b>TS4(NO<sub>2</sub>)si-re</b>         |           |           |           |
| Et = -1324.1497739                      |           |           |           | Et = -1453.3789531                      |           |           |           |
| Gsol = -1324.480902                     |           |           |           | Gsol = -1453.732304                     |           |           |           |
| 6                                       | -2.419621 | -2.736290 | 0.293031  | 6                                       | 2.881882  | 0.134278  | 1.143459  |
| 6                                       | -2.278728 | -1.504208 | 0.915579  | 6                                       | 2.167723  | -1.049906 | 1.299132  |
| 6                                       | -3.308841 | -0.576828 | 0.797959  | 6                                       | 2.671340  | -2.238876 | 0.781163  |
| 6                                       | -4.442701 | -0.860320 | 0.065045  | 6                                       | 3.872038  | -2.250123 | 0.099460  |
| 6                                       | -4.563732 | -2.092766 | -0.565837 | 6                                       | 4.558969  | -1.057774 | -0.047025 |
| 6                                       | -3.548969 | -3.033041 | -0.449414 | 6                                       | 4.082751  | 0.138668  | 0.465210  |
| 6                                       | -1.081538 | -1.239497 | 1.755161  | 6                                       | 0.913294  | -1.077077 | 2.093178  |
| 8                                       | -0.200849 | -2.087804 | 1.910673  | 8                                       | 0.218570  | -2.071062 | 2.196911  |
| 6                                       | 0.012714  | 0.241936  | 0.408136  | 6                                       | -0.598263 | 0.325489  | 0.654321  |
| 6                                       | -0.270084 | 1.638915  | 0.318740  | 6                                       | -0.270403 | 1.422374  | -0.175235 |
| 8                                       | -1.438153 | 1.870642  | -0.320547 | 8                                       | 0.271669  | 2.440388  | 0.542987  |
| 6                                       | -1.945438 | 3.200244  | -0.493233 | 6                                       | 0.632042  | 3.680971  | -0.077370 |
| 6                                       | -3.232088 | 2.981582  | -1.269337 | 6                                       | -0.586517 | 4.341471  | -0.703243 |
| 7                                       | 1.367761  | 0.011223  | 0.860366  | 7                                       | -1.305407 | -0.724919 | -0.036657 |
| 6                                       | 1.690416  | 0.330050  | 2.253041  | 6                                       | -0.552613 | -1.571447 | -0.958902 |
| 6                                       | 2.571853  | -0.709980 | 2.911045  | 6                                       | -1.023968 | -3.010118 | -0.959763 |
| 6                                       | 2.324474  | -0.288272 | 0.000872  | 6                                       | -2.631642 | -0.664956 | -0.105790 |
| 7                                       | 2.204135  | -1.193280 | -0.975178 | 7                                       | -3.369503 | -0.750035 | -1.219076 |
| 6                                       | 3.373758  | -1.184414 | -1.836931 | 6                                       | -4.788016 | -0.807976 | -0.887976 |
| 6                                       | 4.399489  | -0.414591 | -0.984886 | 6                                       | -4.802613 | -0.354001 | 0.582677  |
| 7                                       | 3.552508  | 0.255336  | -0.007176 | 7                                       | -3.414809 | -0.542418 | 0.967935  |
| 6                                       | 1.220142  | -2.246704 | -1.005352 | 6                                       | -2.889759 | -0.375731 | -2.531370 |
| 6                                       | 3.827221  | 1.588617  | 0.476895  | 6                                       | -2.997486 | -0.762280 | 2.327202  |
| 6                                       | 5.439477  | -1.299737 | -0.328039 | 6                                       | -5.262244 | 1.076471  | 0.784389  |
| 6                                       | 3.087357  | -0.548627 | -3.182968 | 6                                       | -5.367438 | -2.190179 | -1.110840 |
| 8                                       | 0.412509  | 2.538611  | 0.798819  | 8                                       | -0.389485 | 1.467885  | -1.398469 |
| 6                                       | -2.245454 | 3.843293  | 0.851181  | 6                                       | 1.133909  | 4.517875  | 1.086594  |
| 6                                       | -0.982565 | 4.043967  | -1.314369 | 6                                       | 1.742801  | 3.481086  | -1.095622 |
| 1                                       | 4.323651  | 1.575921  | 1.446431  | 1                                       | -2.620865 | -1.246791 | -3.127527 |
| 1                                       | 4.477198  | 2.090952  | -0.236559 | 1                                       | -3.683671 | 0.161267  | -3.045513 |
| 1                                       | 2.894975  | 2.144498  | 0.552349  | 1                                       | -2.032182 | 0.286034  | -2.422008 |
| 1                                       | 1.722053  | -3.185705 | -1.235683 | 1                                       | -3.747025 | -1.370357 | 2.831331  |
| 1                                       | 0.747808  | -2.326955 | -0.025921 | 1                                       | -2.048238 | -1.293828 | 2.332788  |
| 1                                       | 0.457510  | -2.063839 | -1.760905 | 1                                       | -2.885401 | 0.175763  | 2.869581  |
| 1                                       | 4.890675  | 0.346241  | -1.591051 | 1                                       | -5.313422 | -0.081282 | -1.506896 |
| 1                                       | 3.703175  | -2.214278 | -1.976304 | 1                                       | -5.418530 | -1.030107 | 1.176228  |
| 1                                       | 2.293144  | -1.080862 | -3.702797 | 1                                       | -5.171536 | 1.370854  | 1.828147  |
| 1                                       | 2.773579  | 0.486579  | -3.056245 | 1                                       | -4.659574 | 1.758362  | 0.186198  |

|                                                                  |           |           |           |                                                                     |           |           |           |
|------------------------------------------------------------------|-----------|-----------|-----------|---------------------------------------------------------------------|-----------|-----------|-----------|
| 1                                                                | 3.976115  | -0.567752 | -3.812800 | 1                                                                   | -6.305905 | 1.186951  | 0.492597  |
| 1                                                                | 6.067105  | -1.777112 | -1.079783 | 1                                                                   | -6.429880 | -2.203628 | -0.870568 |
| 1                                                                | 6.082627  | -0.719221 | 0.330821  | 1                                                                   | -5.251679 | -2.496382 | -2.148811 |
| 1                                                                | 4.958696  | -2.076662 | 0.264640  | 1                                                                   | -4.861681 | -2.921176 | -0.481592 |
| 1                                                                | -0.294977 | -0.355031 | -0.432206 | 1                                                                   | -0.911713 | 0.532042  | 1.661295  |
| 1                                                                | 0.729481  | 0.353962  | 2.751163  | 1                                                                   | 0.465635  | -1.519950 | -0.593939 |
| 1                                                                | 2.099789  | 1.332279  | 2.340926  | 1                                                                   | -0.535546 | -1.150046 | -1.961229 |
| 1                                                                | 2.727286  | -0.443071 | 3.955725  | 1                                                                   | -0.389507 | -3.601569 | -1.618541 |
| 1                                                                | 2.078836  | -1.677326 | 2.867566  | 1                                                                   | -0.958050 | -3.422407 | 0.044573  |
| 1                                                                | 3.553619  | -0.779553 | 2.442731  | 1                                                                   | -2.048898 | -3.112840 | -1.316415 |
| 1                                                                | -1.236610 | -0.446854 | 2.499304  | 1                                                                   | 0.791319  | -0.217830 | 2.762138  |
| 1                                                                | -1.635332 | -3.467501 | 0.421851  | 1                                                                   | 2.468728  | 1.055294  | 1.527863  |
| 1                                                                | -3.651798 | -4.000681 | -0.924958 | 1                                                                   | 4.653543  | 1.040890  | 0.321972  |
| 8                                                                | -5.693490 | -2.325457 | -1.272430 | 7                                                                   | 5.824362  | -1.061530 | -0.757262 |
| 1                                                                | -5.246031 | -0.145919 | -0.032072 | 1                                                                   | 4.287960  | -3.155916 | -0.309380 |
| 1                                                                | -3.207814 | 0.385984  | 1.277032  | 1                                                                   | 2.108813  | -3.147162 | 0.934875  |
| 1                                                                | -3.726219 | 3.932815  | -1.461140 | 1                                                                   | 1.433511  | 5.506603  | 0.742936  |
| 1                                                                | -3.024452 | 2.498208  | -2.222128 | 1                                                                   | 0.354714  | 4.632828  | 1.838158  |
| 1                                                                | -3.911703 | 2.342703  | -0.709210 | 1                                                                   | 1.993383  | 4.043215  | 1.557437  |
| 1                                                                | -2.727806 | 4.808829  | 0.701054  | 1                                                                   | 2.082116  | 4.447134  | -1.468795 |
| 1                                                                | -2.924009 | 3.213791  | 1.426010  | 1                                                                   | 2.591908  | 2.980598  | -0.632111 |
| 1                                                                | -1.332758 | 3.986133  | 1.419591  | 1                                                                   | 1.395768  | 2.877404  | -1.926857 |
| 1                                                                | -1.443210 | 5.001842  | -1.554718 | 1                                                                   | -0.326720 | 5.337146  | -1.061323 |
| 1                                                                | -0.061824 | 4.219071  | -0.768721 | 1                                                                   | -0.955316 | 3.750714  | -1.534941 |
| 1                                                                | -0.748973 | 3.536767  | -2.250024 | 1                                                                   | -1.378099 | 4.444052  | 0.038741  |
| 1                                                                | -5.657620 | -3.209102 | -1.640093 | 8                                                                   | 6.415269  | -0.010925 | -0.859341 |
|                                                                  |           |           |           | 8                                                                   | 6.215080  | -2.115414 | -1.205449 |
| NImag = 1 (-133.4371 cm <sup>-1</sup> )                          |           |           |           | NImag = 1 (-56.4634 cm <sup>-1</sup> )                              |           |           |           |
| <b>TS4(CN)si-re</b><br>Et = -1341.1670071<br>Gsol = -1341.484006 |           |           |           | <b>TS4(COOMe)si-re</b><br>Et = -1476.7636777<br>Gsol = -1477.116713 |           |           |           |
| 6                                                                | 3.157325  | -0.120983 | 1.048239  | 7                                                                   | -3.678203 | -0.644851 | 0.912275  |
| 6                                                                | 2.363463  | -1.258271 | 1.153047  | 6                                                                   | -2.859601 | -0.756355 | -0.137026 |
| 6                                                                | 2.787198  | -2.452126 | 0.579819  | 7                                                                   | -3.559400 | -0.974067 | -1.259922 |
| 6                                                                | 3.984700  | -2.511289 | -0.104554 | 6                                                                   | -4.972610 | -1.153720 | -0.951615 |
| 6                                                                | 4.773008  | -1.367347 | -0.212759 | 6                                                                   | -5.066573 | -0.611213 | 0.486088  |
| 6                                                                | 4.354962  | -0.168565 | 0.366850  | 7                                                                   | -1.539422 | -0.685294 | -0.052429 |
| 6                                                                | 1.111558  | -1.236951 | 1.951564  | 6                                                                   | -0.694716 | -1.510874 | -0.914299 |
| 8                                                                | 0.361136  | -2.195403 | 2.027815  | 6                                                                   | -1.029406 | -2.984905 | -0.828485 |
| 6                                                                | -0.304786 | 0.283246  | 0.622250  | 6                                                                   | -3.090200 | -0.594340 | -2.573935 |
| 6                                                                | 0.086100  | 1.376746  | -0.189354 | 6                                                                   | -5.406342 | -2.598758 | -1.092727 |
| 8                                                                | 0.708127  | 2.337253  | 0.541519  | 6                                                                   | -5.661123 | 0.779880  | 0.582797  |
| 6                                                                | 1.147392  | 3.562137  | -0.059501 | 6                                                                   | -3.285483 | -0.786437 | 2.290931  |
| 6                                                                | -0.031734 | 4.323724  | -0.644936 | 6                                                                   | -0.919679 | 0.417768  | 0.644176  |
| 7                                                                | -1.100107 | -0.689344 | -0.088878 | 6                                                                   | -0.586854 | 1.489370  | -0.226126 |

|   |           |           |           |   |           |           |           |
|---|-----------|-----------|-----------|---|-----------|-----------|-----------|
| 6 | -0.427280 | -1.543267 | -1.065118 | 8 | -0.616317 | 1.459175  | -1.453449 |
| 6 | -0.965404 | -2.958174 | -1.081393 | 8 | -0.159955 | 2.572394  | 0.469163  |
| 6 | -2.421884 | -0.564860 | -0.099427 | 6 | 0.205392  | 3.789113  | -0.194626 |
| 7 | -3.204207 | -0.576779 | -1.186124 | 6 | 1.405446  | 3.578314  | -1.103322 |
| 6 | -4.610482 | -0.579398 | -0.802372 | 6 | -0.980422 | 4.360288  | -0.956864 |
| 6 | -4.547959 | -0.175710 | 0.682152  | 6 | 0.575347  | 4.711833  | 0.953536  |
| 7 | -3.157243 | -0.440138 | 1.007644  | 6 | 0.521173  | -0.796284 | 2.161873  |
| 6 | -2.754838 | -0.169209 | -2.499163 | 8 | -0.130649 | -1.824515 | 2.277839  |
| 6 | -2.705453 | -0.742501 | 2.340470  | 6 | 1.830767  | -0.751131 | 1.462534  |
| 6 | -4.933542 | 1.266355  | 0.946662  | 6 | 2.531610  | 0.445085  | 1.343276  |
| 6 | -5.264381 | -1.924125 | -1.047283 | 6 | 3.778749  | 0.461849  | 0.755351  |
| 8 | -0.048511 | 1.458245  | -1.408204 | 6 | 4.344118  | -0.720179 | 0.284012  |
| 6 | 1.731458  | 4.333286  | 1.111323  | 6 | 3.650707  | -1.919387 | 0.410324  |
| 6 | 2.220477  | 3.304584  | -1.104755 | 6 | 2.402237  | -1.932381 | 1.002252  |
| 1 | -2.559147 | -1.024878 | -3.144029 | 6 | 5.684088  | -0.644699 | -0.333552 |
| 1 | -3.535013 | 0.435194  | -2.956604 | 1 | -2.736773 | -1.453735 | -3.142312 |
| 1 | -1.856057 | 0.436534  | -2.397112 | 1 | -3.915455 | -0.138202 | -3.116546 |
| 1 | -3.466135 | -1.338449 | 2.842542  | 1 | -2.290742 | 0.137501  | -2.471900 |
| 1 | -1.782387 | -1.317092 | 2.289257  | 1 | -3.990062 | -1.450737 | 2.789471  |
| 1 | -2.532945 | 0.163416  | 2.920333  | 1 | -2.289107 | -1.223537 | 2.344640  |
| 1 | -5.122757 | 0.192145  | -1.376412 | 1 | -3.286835 | 0.172631  | 2.807598  |
| 1 | -5.172243 | -0.842784 | 1.277101  | 1 | -5.552881 | -0.524804 | -1.626159 |
| 1 | -4.792113 | 1.522202  | 1.994952  | 1 | -5.633310 | -1.302297 | 1.110359  |
| 1 | -4.322493 | 1.940202  | 0.347844  | 1 | -5.622777 | 1.150027  | 1.605467  |
| 1 | -5.980866 | 1.432760  | 0.697689  | 1 | -5.109647 | 1.474109  | -0.049603 |
| 1 | -6.316450 | -1.895438 | -0.766156 | 1 | -6.703176 | 0.772855  | 0.265341  |
| 1 | -5.202690 | -2.199601 | -2.098415 | 1 | -6.468289 | -2.703954 | -0.873616 |
| 1 | -4.771640 | -2.699679 | -0.462656 | 1 | -5.232135 | -2.958110 | -2.105189 |
| 1 | -0.615152 | 0.501518  | 1.628152  | 1 | -4.847580 | -3.232864 | -0.405895 |
| 1 | 0.606869  | -1.547243 | -0.744044 | 1 | -1.368298 | 0.682028  | 1.585041  |
| 1 | -0.433863 | -1.095728 | -2.055855 | 1 | 0.308933  | -1.340854 | -0.544800 |
| 1 | -0.387246 | -3.560086 | -1.781349 | 1 | -0.702836 | -1.151342 | -1.939952 |
| 1 | -0.877352 | -3.398437 | -0.090924 | 1 | -0.325763 | -3.553704 | -1.435107 |
| 1 | -2.007749 | -3.003290 | -1.397296 | 1 | -0.949263 | -3.320048 | 0.202801  |
| 1 | 1.057679  | -0.408052 | 2.666443  | 1 | -2.031233 | -3.205731 | -1.197275 |
| 1 | 2.809015  | 0.806919  | 1.477994  | 1 | 0.338372  | 0.070947  | 2.807093  |
| 1 | 4.973138  | 0.711163  | 0.274576  | 1 | 2.074452  | 1.360576  | 1.690388  |
| 1 | 4.322255  | -3.435195 | -0.548786 | 1 | 4.337115  | 1.379153  | 0.648071  |
| 1 | 2.165259  | -3.327021 | 0.694821  | 1 | 4.098630  | -2.833224 | 0.053023  |
| 1 | 2.094592  | 5.305783  | 0.783024  | 1 | 1.852684  | -2.852783 | 1.131402  |
| 1 | 0.977606  | 4.486198  | 1.881688  | 1 | 0.864754  | 5.691239  | 0.576067  |
| 1 | 2.563541  | 3.787149  | 1.552888  | 1 | -0.268515 | 4.835525  | 1.630115  |
| 1 | 2.625195  | 4.251512  | -1.461454 | 1 | 1.409351  | 4.301005  | 1.519939  |
| 1 | 3.036856  | 2.729278  | -0.670215 | 1 | 1.741016  | 4.536054  | -1.500758 |
| 1 | 1.813541  | 2.749253  | -1.942471 | 1 | 2.228181  | 3.136748  | -0.543063 |
| 1 | 0.292862  | 5.306187  | -0.986263 | 1 | 1.153759  | 2.918341  | -1.925986 |

|                                        |           |           |           |                                        |           |           |           |
|----------------------------------------|-----------|-----------|-----------|----------------------------------------|-----------|-----------|-----------|
| 1                                      | -0.459491 | 3.781774  | -1.481696 | 1                                      | -0.727566 | 5.342629  | -1.354783 |
| 1                                      | -0.799140 | 4.465759  | 0.115700  | 1                                      | -1.258812 | 3.707279  | -1.777171 |
| 6                                      | 6.015486  | -1.423550 | -0.914740 | 1                                      | -1.833955 | 4.475055  | -0.289002 |
| 7                                      | 7.018156  | -1.470201 | -1.480418 | 8                                      | 6.121650  | -1.829461 | -0.764468 |
| NImag = 1 (-67.5352 cm <sup>-1</sup> ) |           |           |           | 8                                      | 6.327700  | 0.365676  | -0.445504 |
|                                        |           |           |           | 6                                      | 7.401861  | -1.814172 | -1.363038 |
|                                        |           |           |           | 1                                      | 7.604707  | -2.838069 | -1.655032 |
|                                        |           |           |           | 1                                      | 7.410854  | -1.162718 | -2.232546 |
|                                        |           |           |           | 1                                      | 8.151031  | -1.465657 | -0.657455 |
|                                        |           |           |           | NImag = 1 (-74.9482 cm <sup>-1</sup> ) |           |           |           |
| <b>TS4(Cl)si-re</b>                    |           |           |           | <b>TS4(H)si-re</b>                     |           |           |           |
| Et = -1708.5661986                     |           |           |           | Et = -1248.9599661                     |           |           |           |
| Gsol = -1708.885509                    |           |           |           | Gsol = -1249.255247                    |           |           |           |
| 6                                      | 3.048455  | -0.051022 | 1.060272  | 7                                      | -3.029692 | -0.120462 | -1.066114 |
| 6                                      | 2.216212  | -1.160549 | 1.147604  | 6                                      | -2.151174 | -0.236499 | -0.055665 |
| 6                                      | 2.629705  | -2.365289 | 0.593582  | 7                                      | -2.758759 | -0.043415 | 1.119713  |
| 6                                      | 3.847483  | -2.463393 | -0.056161 | 6                                      | -4.128105 | 0.403439  | 0.925159  |
| 6                                      | 4.656234  | -1.343101 | -0.139502 | 6                                      | -4.382299 | 0.032810  | -0.546263 |
| 6                                      | 4.267781  | -0.133439 | 0.415600  | 7                                      | -0.869173 | -0.519145 | -0.196603 |
| 6                                      | 0.940252  | -1.101140 | 1.906821  | 6                                      | -0.415771 | -1.413146 | -1.263906 |
| 8                                      | 0.187608  | -2.065161 | 1.998444  | 6                                      | -1.133846 | -2.745892 | -1.260690 |
| 6                                      | -0.404946 | 0.343478  | 0.614731  | 6                                      | -2.262837 | -0.493404 | 2.396891  |
| 6                                      | 0.019911  | 1.425080  | -0.207925 | 6                                      | -4.295232 | 1.878919  | 1.229400  |
| 8                                      | 0.622481  | 2.392701  | 0.525629  | 6                                      | -5.208595 | -1.224503 | -0.727809 |
| 6                                      | 1.098344  | 3.601038  | -0.082434 | 6                                      | -2.651733 | 0.317899  | -2.390740 |
| 6                                      | -0.051632 | 4.367064  | -0.717628 | 6                                      | 0.142152  | 0.203065  | 0.540439  |
| 7                                      | -1.199609 | -0.613661 | -0.120371 | 6                                      | 0.741671  | 1.224222  | -0.255283 |
| 6                                      | -0.512907 | -1.460499 | -1.095751 | 8                                      | 0.608147  | 1.367023  | -1.465224 |
| 6                                      | -0.985995 | -2.898199 | -1.061878 | 8                                      | 1.548997  | 2.014673  | 0.491689  |
| 6                                      | -2.520970 | -0.546791 | -0.100271 | 6                                      | 2.241374  | 3.129632  | -0.085449 |
| 7                                      | -3.317389 | -0.613685 | -1.178038 | 6                                      | 2.985784  | 3.723742  | 1.097612  |
| 6                                      | -4.716314 | -0.672156 | -0.773685 | 6                                      | 3.227510  | 2.672813  | -1.148296 |
| 6                                      | -4.651974 | -0.231481 | 0.699818  | 6                                      | 1.253076  | 4.143732  | -0.639869 |
| 7                                      | -3.246847 | -0.426107 | 1.014683  | 6                                      | 1.225052  | -1.530529 | 1.637431  |
| 6                                      | -2.905053 | -0.177532 | -2.493677 | 8                                      | 0.298327  | -2.332477 | 1.738533  |
| 6                                      | -2.778675 | -0.718443 | 2.345997  | 6                                      | 2.420583  | -1.804173 | 0.795408  |
| 6                                      | -5.098651 | 1.197505  | 0.937751  | 6                                      | 2.533325  | -3.023168 | 0.137811  |
| 6                                      | -5.311022 | -2.050932 | -0.977004 | 6                                      | 3.671067  | -3.320080 | -0.593755 |
| 8                                      | -0.077798 | 1.484250  | -1.429297 | 6                                      | 4.709807  | -2.404687 | -0.664101 |
| 6                                      | 1.656004  | 4.383894  | 1.093465  | 6                                      | 4.607798  | -1.191533 | 0.003148  |
| 6                                      | 2.199657  | 3.310829  | -1.089024 | 6                                      | 3.470267  | -0.894718 | 0.731730  |
| 1                                      | -2.687727 | -1.018606 | -3.150630 | 1                                      | -2.622203 | -0.508234 | -3.100034 |
| 1                                      | -3.712351 | 0.403863  | -2.934048 | 1                                      | -3.383407 | 1.044267  | -2.738221 |
| 1                                      | -2.025313 | 0.456961  | -2.402977 | 1                                      | -1.675883 | 0.797351  | -2.347829 |
| 1                                      | -3.514701 | -1.347041 | 2.845472  | 1                                      | -3.066969 | -1.007821 | 2.921574  |

|                                        |           |           |           |                                         |           |           |           |
|----------------------------------------|-----------|-----------|-----------|-----------------------------------------|-----------|-----------|-----------|
| 1                                      | -1.832312 | -1.256755 | 2.292366  | 1                                       | -1.437512 | -1.190655 | 2.246651  |
| 1                                      | -2.645145 | 0.191004  | 2.930815  | 1                                       | -1.927023 | 0.341346  | 3.011315  |
| 1                                      | -5.272258 | 0.060811  | -1.357645 | 1                                       | -4.856571 | 0.865629  | -1.064634 |
| 1                                      | -5.238043 | -0.911332 | 1.318572  | 1                                       | -4.775015 | -0.185302 | 1.575683  |
| 1                                      | -4.949886 | 1.483777  | 1.977092  | 1                                       | -4.015601 | 2.096793  | 2.258264  |
| 1                                      | -4.529273 | 1.883909  | 0.312610  | 1                                       | -3.664002 | 2.476719  | 0.573438  |
| 1                                      | -6.156630 | 1.311344  | 0.704389  | 1                                       | -5.331340 | 2.184559  | 1.088291  |
| 1                                      | -6.359357 | -2.064014 | -0.680922 | 1                                       | -6.218409 | -1.078924 | -0.345672 |
| 1                                      | -5.250661 | -2.348759 | -2.022106 | 1                                       | -5.279758 | -1.492694 | -1.780243 |
| 1                                      | -4.774680 | -2.788420 | -0.381599 | 1                                       | -4.754678 | -2.058670 | -0.194725 |
| 1                                      | -0.794593 | 0.611930  | 1.580948  | 1                                       | -0.153455 | 0.505080  | 1.529983  |
| 1                                      | 0.529133  | -1.409364 | -0.805410 | 1                                       | 0.636697  | -1.562765 | -1.057107 |
| 1                                      | -0.567859 | -1.038426 | -2.095477 | 1                                       | -0.465973 | -0.926108 | -2.233380 |
| 1                                      | -0.394441 | -3.492038 | -1.757739 | 1                                       | -0.701590 | -3.391431 | -2.024435 |
| 1                                      | -0.857064 | -3.302227 | -0.060853 | 1                                       | -1.013011 | -3.222106 | -0.291003 |
| 1                                      | -2.031332 | -2.998123 | -1.354811 | 1                                       | -2.196990 | -2.645822 | -1.480243 |
| 1                                      | 0.905793  | -0.281872 | 2.634739  | 1                                       | 1.409404  | -0.779335 | 2.415452  |
| 1                                      | 2.720130  | 0.889042  | 1.480096  | 1                                       | 3.374590  | 0.054407  | 1.240207  |
| 1                                      | 4.916006  | 0.725625  | 0.339240  | 1                                       | 5.418675  | -0.478781 | -0.046472 |
| 17                                     | 6.187107  | -1.455298 | -0.945826 | 1                                       | 5.599662  | -2.636697 | -1.231488 |
| 1                                      | 4.175571  | -3.397417 | -0.485343 | 1                                       | 3.753707  | -4.270595 | -1.101565 |
| 1                                      | 1.984793  | -3.225449 | 0.695068  | 1                                       | 1.721487  | -3.729825 | 0.227612  |
| 1                                      | 2.041234  | 5.346450  | 0.760985  | 1                                       | 3.552282  | 4.600835  | 0.788734  |
| 1                                      | 0.880857  | 4.558534  | 1.837626  | 1                                       | 2.287010  | 4.018682  | 1.878533  |
| 1                                      | 2.466918  | 3.834831  | 1.569331  | 1                                       | 3.678435  | 2.996337  | 1.517629  |
| 1                                      | 2.633354  | 4.246319  | -1.441973 | 1                                       | 3.833826  | 3.517370  | -1.475667 |
| 1                                      | 2.989968  | 2.724369  | -0.622921 | 1                                       | 3.892700  | 1.912600  | -0.742015 |
| 1                                      | 1.809842  | 2.754213  | -1.933991 | 1                                       | 2.705928  | 2.254231  | -2.001774 |
| 1                                      | 0.297274  | 5.338040  | -1.067725 | 1                                       | 1.782955  | 5.038636  | -0.964923 |
| 1                                      | -0.461330 | 3.814917  | -1.556799 | 1                                       | 0.711384  | 3.727781  | -1.482719 |
| 1                                      | -0.839542 | 4.534308  | 0.016339  | 1                                       | 0.541001  | 4.432890  | 0.132607  |
| NImag = 1 (-95.2476 cm <sup>-1</sup> ) |           |           |           | NImag = 1 (-112.6867 cm <sup>-1</sup> ) |           |           |           |
| <b>TS4(Me)si-re</b>                    |           |           |           | <b>TS4(OMe)si-re</b>                    |           |           |           |
| Et = -1288.2702656                     |           |           |           | Et = -1363.4457062                      |           |           |           |
| Gsol = -1288.570452                    |           |           |           | Gsol = -1363.769777                     |           |           |           |
| 6                                      | 3.275596  | -0.395534 | 0.980579  | 7                                       | -3.237304 | -0.416447 | 1.017838  |
| 6                                      | 2.322674  | -1.408099 | 1.001998  | 6                                       | -2.515035 | -0.566423 | -0.097926 |
| 6                                      | 2.609783  | -2.611205 | 0.372287  | 7                                       | -3.319490 | -0.742655 | -1.161006 |
| 6                                      | 3.814286  | -2.787993 | -0.287756 | 6                                       | -4.707117 | -0.860294 | -0.732984 |
| 6                                      | 4.765299  | -1.775655 | -0.327117 | 6                                       | -4.653127 | -0.315171 | 0.704817  |
| 6                                      | 4.476834  | -0.577606 | 0.323996  | 7                                       | -1.196908 | -0.555456 | -0.146385 |
| 6                                      | 1.061260  | -1.255820 | 1.773319  | 6                                       | -0.475888 | -1.410600 | -1.092213 |
| 8                                      | 0.229514  | -2.159647 | 1.855126  | 6                                       | -0.884033 | -2.865466 | -0.999768 |
| 6                                      | -0.144139 | 0.299600  | 0.580275  | 6                                       | -2.951195 | -0.341299 | -2.499488 |
| 6                                      | 0.380826  | 1.347123  | -0.235196 | 6                                       | -5.216108 | -2.284401 | -0.829779 |

|   |           |           |           |   |           |           |           |
|---|-----------|-----------|-----------|---|-----------|-----------|-----------|
| 8 | 1.073886  | 2.243411  | 0.506067  | 6 | -5.168744 | 1.103127  | 0.847789  |
| 6 | 1.678052  | 3.397530  | -0.092976 | 6 | -2.755416 | -0.641668 | 2.359079  |
| 6 | 0.618193  | 4.288391  | -0.722498 | 6 | -0.421877 | 0.417055  | 0.590076  |
| 7 | -1.044136 | -0.550492 | -0.165097 | 6 | 0.025981  | 1.474955  | -0.262176 |
| 6 | -0.460852 | -1.430381 | -1.179964 | 8 | -0.027143 | 1.485929  | -1.485365 |
| 6 | -1.039258 | -2.829064 | -1.147902 | 8 | 0.585307  | 2.475232  | 0.457493  |
| 6 | -2.353240 | -0.396913 | -0.082223 | 6 | 1.074027  | 3.666454  | -0.175133 |
| 7 | -3.195809 | -0.395133 | -1.128769 | 6 | 2.212565  | 3.353298  | -1.132158 |
| 6 | -4.577700 | -0.367692 | -0.668076 | 6 | -0.060064 | 4.398252  | -0.875631 |
| 6 | -4.424483 | 0.053109  | 0.804825  | 6 | 1.583419  | 4.492945  | 0.992785  |
| 7 | -3.025130 | -0.240501 | 1.062802  | 6 | 0.882910  | -0.913984 | 1.886821  |
| 6 | -2.807649 | 0.043453  | -2.450349 | 8 | 0.150082  | -1.899666 | 2.005860  |
| 6 | -2.535592 | -0.603935 | 2.369838  | 6 | 2.184982  | -0.986381 | 1.174611  |
| 6 | -4.761975 | 1.507041  | 1.069857  | 6 | 3.029018  | 0.119598  | 1.096728  |
| 6 | -5.267833 | -1.703627 | -0.855740 | 6 | 4.265477  | 0.023237  | 0.499776  |
| 8 | 0.281642  | 1.429476  | -1.454007 | 6 | 4.691885  | -1.193271 | -0.031613 |
| 6 | 2.315946  | 4.106420  | 1.088905  | 6 | 3.866911  | -2.307225 | 0.048823  |
| 6 | 2.742769  | 2.997888  | -1.101521 | 6 | 2.624902  | -2.193443 | 0.656665  |
| 1 | -2.672297 | -0.793995 | -3.133549 | 8 | 5.919115  | -1.190152 | -0.594462 |
| 1 | -3.589679 | 0.688231  | -2.846047 | 1 | -2.682736 | -1.194366 | -3.121362 |
| 1 | -1.883335 | 0.613996  | -2.384037 | 1 | -3.798607 | 0.165237  | -2.956722 |
| 1 | -3.299978 | -1.190888 | 2.877609  | 1 | -2.114010 | 0.351798  | -2.451168 |
| 1 | -1.633781 | -1.210021 | 2.269483  | 1 | -3.464431 | -1.283871 | 2.880256  |
| 1 | -2.318207 | 0.276963  | 2.972991  | 1 | -1.786083 | -1.142689 | 2.323911  |
| 1 | -5.108822 | 0.405127  | -1.223103 | 1 | -2.664785 | 0.292709  | 2.912129  |
| 1 | -5.031301 | -0.590406 | 1.442021  | 1 | -5.315104 | -0.206436 | -1.357705 |
| 1 | -4.550878 | 1.773108  | 2.103800  | 1 | -5.199141 | -0.977707 | 1.376464  |
| 1 | -4.172689 | 2.158301  | 0.425814  | 1 | -5.019624 | 1.469334  | 1.861636  |
| 1 | -5.818305 | 1.695453  | 0.881414  | 1 | -4.642330 | 1.770080  | 0.166416  |
| 1 | -6.301809 | -1.652663 | -0.516338 | 1 | -6.234123 | 1.148696  | 0.624605  |
| 1 | -5.269271 | -1.995145 | -1.904391 | 1 | -6.258677 | -2.341529 | -0.518704 |
| 1 | -4.755660 | -2.479313 | -0.288286 | 1 | -5.146916 | -2.652200 | -1.851840 |
| 1 | -0.515817 | 0.609506  | 1.541573  | 1 | -4.628728 | -2.942648 | -0.191280 |
| 1 | 0.593003  | -1.464220 | -0.932382 | 1 | -0.881372 | 0.743539  | 1.507070  |
| 1 | -0.524422 | -0.986801 | -2.169518 | 1 | 0.563812  | -1.303696 | -0.808348 |
| 1 | -0.518498 | -3.452712 | -1.873756 | 1 | -0.552699 | -1.028311 | -2.105912 |
| 1 | -0.902832 | -3.256051 | -0.157594 | 1 | -0.260745 | -3.458881 | -1.667894 |
| 1 | -2.099001 | -2.846120 | -1.403235 | 1 | -0.740366 | -3.216844 | 0.018714  |
| 1 | 1.121187  | -0.474988 | 2.542186  | 1 | -1.921895 | -3.025312 | -1.292259 |
| 1 | 3.056853  | 0.543247  | 1.470155  | 1 | 0.840807  | -0.092491 | 2.613754  |
| 1 | 5.208892  | 0.219218  | 0.315144  | 1 | 2.693061  | 1.066163  | 1.496080  |
| 6 | 6.062207  | -1.955818 | -1.056479 | 1 | 4.927776  | 0.873003  | 0.429847  |
| 1 | 4.025962  | -3.732516 | -0.771091 | 1 | 4.182285  | -3.261929 | -0.341601 |
| 1 | 1.880653  | -3.406237 | 0.427712  | 1 | 1.980330  | -3.054901 | 0.752405  |
| 1 | 2.806182  | 5.022481  | 0.763310  | 1 | 1.970484  | 5.448338  | 0.642194  |
| 1 | 1.562714  | 4.360872  | 1.832513  | 1 | 0.781484  | 4.683092  | 1.704048  |

|                                         |           |           |           |                                         |           |           |           |
|-----------------------------------------|-----------|-----------|-----------|-----------------------------------------|-----------|-----------|-----------|
| 1                                       | 3.059077  | 3.466790  | 1.561954  | 1                                       | 2.382639  | 3.967940  | 1.513290  |
| 1                                       | 3.276331  | 3.884201  | -1.444925 | 1                                       | 2.657182  | 4.281461  | -1.491023 |
| 1                                       | 3.461991  | 2.322721  | -0.640840 | 1                                       | 2.985079  | 2.779427  | -0.623228 |
| 1                                       | 2.295830  | 2.496024  | -1.952431 | 1                                       | 1.856014  | 2.775715  | -1.977689 |
| 1                                       | 1.070609  | 5.219283  | -1.063225 | 1                                       | 0.293209  | 5.358119  | -1.251102 |
| 1                                       | 0.152597  | 3.791817  | -1.567277 | 1                                       | -0.437386 | 3.811342  | -1.706480 |
| 1                                       | -0.148679 | 4.533107  | 0.011996  | 1                                       | -0.873170 | 4.586167  | -0.174964 |
| 1                                       | 6.059906  | -1.413286 | -2.003044 | 6                                       | 6.392867  | -2.383902 | -1.144048 |
| 1                                       | 6.902558  | -1.581378 | -0.473171 | 1                                       | 7.378081  | -2.164929 | -1.542311 |
| 1                                       | 6.250086  | -3.004012 | -1.279964 | 1                                       | 6.478816  | -3.168032 | -0.389840 |
|                                         |           |           |           | 1                                       | 5.750847  | -2.736569 | -1.953042 |
| NImag = 1 (-117.5871 cm <sup>-1</sup> ) |           |           |           | NImag = 1 (-130.6027 cm <sup>-1</sup> ) |           |           |           |
| <b>TS4(OH)si-re</b>                     |           |           |           | <b>TSf1- trans(NO<sub>2</sub>)</b>      |           |           |           |
| Et = -1324.150044                       |           |           |           | Et = -1453.3277043                      |           |           |           |
| Gsol = -1324.481270                     |           |           |           | Gsol = -1453.676557                     |           |           |           |
| 6                                       | 3.287682  | -0.409499 | 0.943807  | 7                                       | 2.590298  | -1.824220 | 1.337487  |
| 6                                       | 2.323565  | -1.413014 | 0.972766  | 6                                       | 1.768738  | -1.950544 | 0.273315  |
| 6                                       | 2.601915  | -2.621965 | 0.350953  | 7                                       | 2.488622  | -2.262772 | -0.823171 |
| 6                                       | 3.802968  | -2.821500 | -0.307212 | 6                                       | 3.885231  | -2.431074 | -0.485719 |
| 6                                       | 4.749736  | -1.806919 | -0.337856 | 6                                       | 3.958099  | -1.718801 | 0.867626  |
| 6                                       | 4.490137  | -0.595997 | 0.294400  | 8                                       | 0.525802  | -1.891586 | 0.314610  |
| 6                                       | 1.062291  | -1.247545 | 1.739070  | 6                                       | 1.902144  | -2.857126 | -1.985897 |
| 8                                       | 0.226906  | -2.150691 | 1.823395  | 6                                       | 4.832531  | -1.878935 | -1.526572 |
| 6                                       | -0.131756 | 0.306594  | 0.570547  | 6                                       | 4.974467  | -2.312613 | 1.815143  |
| 6                                       | 0.404796  | 1.350312  | -0.245020 | 6                                       | 2.168783  | -1.056129 | 2.475786  |
| 8                                       | 1.108184  | 2.237119  | 0.497109  | 6                                       | -0.379805 | -0.281874 | -0.589829 |
| 6                                       | 1.716305  | 3.391567  | -0.098920 | 6                                       | 0.236191  | 0.843230  | 0.167122  |
| 6                                       | 0.658100  | 4.289879  | -0.720411 | 7                                       | 1.629110  | 0.694292  | 0.019019  |
| 7                                       | -1.042847 | -0.528879 | -0.178144 | 6                                       | 2.218306  | 1.394850  | -1.084973 |
| 6                                       | -0.468578 | -1.406317 | -1.200576 | 6                                       | 3.229734  | 2.435347  | -0.611847 |
| 6                                       | -1.046210 | -2.805342 | -1.167140 | 6                                       | -1.677305 | -0.852641 | -0.321429 |
| 6                                       | -2.350493 | -0.380361 | -0.078275 | 6                                       | -2.218549 | -0.929336 | 0.966437  |
| 7                                       | -3.204900 | -0.383051 | -1.116044 | 6                                       | -3.516764 | -1.346377 | 1.157589  |
| 6                                       | -4.581571 | -0.360725 | -0.639630 | 6                                       | -4.279133 | -1.688521 | 0.052475  |
| 6                                       | -4.413283 | 0.066193  | 0.829635  | 6                                       | -3.772798 | -1.633174 | -1.234490 |
| 7                                       | -3.010511 | -0.223541 | 1.073935  | 6                                       | -2.469235 | -1.223579 | -1.412637 |
| 6                                       | -2.833405 | 0.060886  | -2.440468 | 6                                       | -0.423825 | 2.149228  | -0.281960 |
| 6                                       | -2.509747 | -0.591129 | 2.375980  | 8                                       | -1.195047 | 2.222217  | -1.204498 |
| 6                                       | -4.750849 | 1.520439  | 1.092707  | 8                                       | -0.014261 | 3.160863  | 0.463567  |
| 6                                       | -5.266893 | -1.700954 | -0.813965 | 6                                       | -0.471106 | 4.517257  | 0.228211  |
| 8                                       | 0.305434  | 1.434752  | -1.463088 | 6                                       | 0.258188  | 5.310602  | 1.295016  |
| 6                                       | 2.361286  | 4.091770  | 1.084221  | 6                                       | -1.972805 | 4.601153  | 0.435094  |
| 6                                       | 2.775551  | 2.991998  | -1.113051 | 6                                       | -0.059134 | 4.979432  | -1.157634 |
| 1                                       | -2.700965 | -0.773857 | -3.127574 | 1                                       | 5.020864  | -1.756730 | 2.749267  |
| 1                                       | -3.622502 | 0.702993  | -2.826337 | 1                                       | 5.968103  | -2.280881 | 1.370248  |



|                                                                     |           |           |           |                                                                       |           |           |           |
|---------------------------------------------------------------------|-----------|-----------|-----------|-----------------------------------------------------------------------|-----------|-----------|-----------|
| 1                                                                   | -1.911145 | 0.635493  | -2.383306 | 1                                                                     | 4.729260  | -3.348712 | 2.042446  |
| 1                                                                   | -3.270426 | -1.178972 | 2.888316  | 1                                                                     | 4.172817  | -0.657476 | 0.697384  |
| 1                                                                   | -1.609218 | -1.198163 | 2.266396  | 1                                                                     | 4.088232  | -3.500803 | -0.342610 |
| 1                                                                   | -2.287365 | 0.287999  | 2.979907  | 1                                                                     | 5.862932  | -1.980599 | -1.188985 |
| 1                                                                   | -5.123077 | 0.407179  | -1.191400 | 1                                                                     | 4.744546  | -2.417622 | -2.468589 |
| 1                                                                   | -5.011754 | -0.575957 | 1.475956  | 1                                                                     | 4.629539  | -0.825652 | -1.709184 |
| 1                                                                   | -4.527898 | 1.791001  | 2.122981  | 1                                                                     | 2.165957  | -2.307452 | -2.887932 |
| 1                                                                   | -4.170674 | 2.170404  | 0.439138  | 1                                                                     | 0.823934  | -2.848544 | -1.864986 |
| 1                                                                   | -5.809740 | 1.705964  | 0.916093  | 1                                                                     | 2.230902  | -3.892620 | -2.100049 |
| 1                                                                   | -6.297157 | -1.654028 | -0.462888 | 1                                                                     | 2.280663  | 0.009178  | 2.262234  |
| 1                                                                   | -5.278760 | -1.996829 | -1.861336 | 1                                                                     | 1.123688  | -1.275399 | 2.667012  |
| 1                                                                   | -4.744133 | -2.471555 | -0.249219 | 1                                                                     | 2.747286  | -1.345121 | 3.349316  |
| 1                                                                   | -0.508039 | 0.626270  | 1.527001  | 1                                                                     | 1.335455  | 5.220558  | 1.170838  |
| 1                                                                   | 0.587397  | -1.440162 | -0.961999 | 1                                                                     | -0.003584 | 4.947636  | 2.286944  |
| 1                                                                   | -0.540829 | -0.959737 | -2.188082 | 1                                                                     | -0.011483 | 6.362944  | 1.228850  |
| 1                                                                   | -0.530882 | -3.427054 | -1.898623 | 1                                                                     | -2.240146 | 4.218703  | 1.419043  |
| 1                                                                   | -0.901997 | -3.233633 | -0.178518 | 1                                                                     | -2.288553 | 5.641902  | 0.379868  |
| 1                                                                   | -2.107789 | -2.822142 | -1.414428 | 1                                                                     | -2.506311 | 4.034490  | -0.320917 |
| 1                                                                   | 1.132228  | -0.473335 | 2.513785  | 1                                                                     | -0.293121 | 6.037164  | -1.269875 |
| 1                                                                   | 3.075478  | 0.535308  | 1.424205  | 1                                                                     | -0.580993 | 4.423174  | -1.929227 |
| 1                                                                   | 5.242614  | 0.177396  | 0.264315  | 1                                                                     | 1.013610  | 4.853514  | -1.294991 |
| 8                                                                   | 5.942937  | -1.943860 | -0.959078 | 1                                                                     | -0.031184 | 0.721478  | 1.223322  |
| 1                                                                   | 4.012038  | -3.770266 | -0.785688 | 1                                                                     | 2.751879  | 0.693641  | -1.743088 |
| 1                                                                   | 1.864633  | -3.409113 | 0.407966  | 1                                                                     | 1.489969  | 1.897216  | -1.738117 |
| 1                                                                   | 2.854662  | 5.007014  | 0.761189  | 1                                                                     | 3.720639  | 2.929233  | -1.452571 |
| 1                                                                   | 1.611779  | 4.346148  | 1.831610  | 1                                                                     | 2.737870  | 3.186704  | 0.002263  |
| 1                                                                   | 3.103379  | 3.446785  | 1.551578  | 1                                                                     | 3.995175  | 1.960402  | 0.001045  |
| 1                                                                   | 3.310521  | 3.877926  | -1.455093 | 1                                                                     | -2.060743 | -1.163243 | -2.410331 |
| 1                                                                   | 3.495341  | 2.313264  | -0.658683 | 1                                                                     | -1.603539 | -0.692442 | 1.819431  |
| 1                                                                   | 2.324064  | 2.495097  | -1.964427 | 1                                                                     | -4.398356 | -1.913619 | -2.065215 |
| 1                                                                   | 1.113620  | 5.220270  | -1.058235 | 1                                                                     | -3.949300 | -1.419025 | 2.141424  |
| 1                                                                   | 0.187532  | 3.799703  | -1.566200 | 1                                                                     | -0.001432 | -0.394109 | -1.593996 |
| 1                                                                   | -0.105250 | 4.534601  | 0.017750  | 7                                                                     | -5.644939 | -2.129818 | 0.250991  |
| 1                                                                   | 5.995159  | -2.816488 | -1.350434 | 8                                                                     | -6.063574 | -2.168916 | 1.385657  |
|                                                                     |           |           |           | 8                                                                     | -6.285160 | -2.432893 | -0.730026 |
| NImag = 1 (-128.5153 cm <sup>-1</sup> )                             |           |           |           | NImag = 1 (-331.9691 cm <sup>-1</sup> )                               |           |           |           |
| <b>TSfl- trans(CN)</b><br>Et = -1341.1158491<br>Gsol = -1341.428391 |           |           |           | <b>TSfl- trans(COOMe)</b><br>Et = -1476.717031<br>Gsol = -1477.065774 |           |           |           |
| 6                                                                   | -2.371103 | -1.939979 | -1.373678 | 7                                                                     | 2.898912  | -1.535553 | 1.463038  |
| 6                                                                   | -1.689943 | -1.367585 | -0.295966 | 6                                                                     | 2.017909  | -1.805501 | 0.482610  |
| 6                                                                   | -2.200938 | -1.541105 | 0.993990  | 7                                                                     | 2.643271  | -2.448416 | -0.530270 |
| 6                                                                   | -3.364977 | -2.247014 | 1.197512  | 6                                                                     | 4.001023  | -2.772253 | -0.144600 |
| 6                                                                   | -4.046019 | -2.796078 | 0.110458  | 6                                                                     | 4.246517  | -1.756352 | 0.972515  |
| 6                                                                   | -3.542740 | -2.638213 | -1.179608 | 8                                                                     | 0.793845  | -1.583109 | 0.530836  |

|   |           |           |           |   |           |           |           |
|---|-----------|-----------|-----------|---|-----------|-----------|-----------|
| 6 | -0.559343 | -0.518779 | -0.579994 | 6 | 1.920638  | -3.238366 | -1.483309 |
| 6 | -0.197422 | 0.717557  | 0.166908  | 6 | 4.993842  | -2.710579 | -1.282003 |
| 6 | -1.138537 | 1.844512  | -0.267137 | 6 | 5.208350  | -2.239580 | 2.033093  |
| 8 | -0.921743 | 2.931313  | 0.453610  | 6 | 2.625589  | -0.508647 | 2.431665  |
| 6 | -1.660762 | 4.157562  | 0.228778  | 6 | -0.004772 | -0.134439 | -0.629592 |
| 6 | -1.406382 | 4.676234  | -1.174956 | 6 | 0.598962  | 1.033109  | 0.070807  |
| 6 | -5.252447 | -3.528607 | 0.321243  | 7 | 1.995406  | 0.935673  | -0.138564 |
| 7 | 1.189841  | 0.896713  | 0.006444  | 6 | 2.378757  | 1.577838  | -1.348643 |
| 6 | 1.588955  | 1.693923  | -1.116693 | 6 | 3.836433  | 1.325270  | -1.668801 |
| 6 | 2.464006  | 2.863143  | -0.678376 | 6 | -1.343514 | -0.637479 | -0.428247 |
| 8 | -1.944043 | 1.738931  | -1.156503 | 6 | -2.019552 | -0.514308 | 0.788884  |
| 6 | -1.074713 | 5.101571  | 1.260692  | 6 | -3.338781 | -0.897021 | 0.897431  |
| 6 | -3.138330 | 3.929683  | 0.493640  | 6 | -4.010961 | -1.409764 | -0.209270 |
| 8 | 0.703133  | -1.878314 | 0.317357  | 6 | -3.345865 | -1.541555 | -1.422779 |
| 6 | 1.925547  | -1.646046 | 0.278254  | 6 | -2.023520 | -1.167423 | -1.527895 |
| 7 | 2.692855  | -1.323653 | 1.342468  | 6 | -0.104055 | 2.325808  | -0.351712 |
| 6 | 3.998666  | -0.904596 | 0.871650  | 8 | -0.829128 | 2.422961  | -1.307126 |
| 6 | 4.098053  | -1.622468 | -0.477011 | 8 | 0.223975  | 3.312676  | 0.470600  |
| 7 | 2.702356  | -1.794219 | -0.813710 | 6 | -0.271778 | 4.658558  | 0.282667  |
| 6 | 2.101481  | -0.661871 | 2.472040  | 6 | 0.367901  | 5.418289  | 1.428995  |
| 6 | 2.272614  | -2.511902 | -1.974746 | 6 | -1.785183 | 4.678251  | 0.408206  |
| 6 | 4.885248  | -0.863224 | -1.520955 | 6 | 0.194931  | 5.216092  | -1.050126 |
| 6 | 5.123683  | -1.237883 | 1.824037  | 1 | 5.386530  | -1.477053 | 2.788287  |
| 1 | 5.035207  | -0.682340 | 2.755351  | 1 | 6.171149  | -2.481241 | 1.585109  |
| 1 | 6.083460  | -0.975702 | 1.380848  | 1 | 4.821874  | -3.130137 | 2.526042  |
| 1 | 5.128067  | -2.301446 | 2.056740  | 1 | 4.607173  | -0.820533 | 0.532030  |
| 1 | 3.958558  | 0.176187  | 0.694505  | 1 | 4.011530  | -3.782991 | 0.286437  |
| 1 | 4.551346  | -2.611567 | -0.328364 | 1 | 5.998375  | -2.915839 | -0.915146 |
| 1 | 5.905983  | -0.701247 | -1.177424 | 1 | 4.768162  | -3.455092 | -2.043582 |
| 1 | 4.941029  | -1.415966 | -2.457326 | 1 | 4.989954  | -1.728034 | -1.747774 |
| 1 | 4.426848  | 0.104217  | -1.715707 | 1 | 2.243983  | -3.019135 | -2.499014 |
| 1 | 2.400599  | -1.918033 | -2.878445 | 1 | 0.864804  | -3.007812 | -1.387586 |
| 1 | 1.222352  | -2.755971 | -1.853413 | 1 | 2.062189  | -4.305365 | -1.293917 |
| 1 | 2.834947  | -3.441806 | -2.086516 | 1 | 2.789423  | 0.473280  | 1.981776  |
| 1 | 1.957427  | 0.396472  | 2.243079  | 1 | 1.585802  | -0.592569 | 2.730916  |
| 1 | 1.139046  | -1.121250 | 2.671466  | 1 | 3.248678  | -0.661712 | 3.308737  |
| 1 | 2.733457  | -0.792932 | 3.346551  | 1 | 1.452562  | 5.361173  | 1.364252  |
| 1 | -0.007628 | 5.235334  | 1.095123  | 1 | 0.059702  | 4.998542  | 2.384684  |
| 1 | -1.218512 | 4.706965  | 2.264584  | 1 | 0.071420  | 6.465238  | 1.398188  |
| 1 | -1.560137 | 6.073697  | 1.197432  | 1 | -2.090560 | 4.228242  | 1.351847  |
| 1 | -3.283810 | 3.515722  | 1.490386  | 1 | -2.138353 | 5.708451  | 0.394734  |
| 1 | -3.666792 | 4.880556  | 0.442498  | 1 | -2.253182 | 4.137077  | -0.407568 |
| 1 | -3.568805 | 3.251879  | -0.236111 | 1 | -0.091774 | 6.264391  | -1.124312 |
| 1 | -1.863911 | 5.658402  | -1.286116 | 1 | -0.247019 | 4.673155  | -1.878889 |
| 1 | -1.825085 | 4.010175  | -1.922163 | 1 | 1.279294  | 5.154597  | -1.125911 |
| 1 | -0.336874 | 4.778866  | -1.351729 | 1 | 0.385071  | 0.913693  | 1.137963  |

|                                         |           |           |           |                                         |           |           |           |
|-----------------------------------------|-----------|-----------|-----------|-----------------------------------------|-----------|-----------|-----------|
| 1                                       | -0.418967 | 0.542031  | 1.226583  | 1                                       | 1.765575  | 1.243765  | -2.215509 |
| 1                                       | 2.170680  | 1.097111  | -1.836928 | 1                                       | 2.212866  | 2.670838  | -1.326787 |
| 1                                       | 0.751443  | 2.099757  | -1.702407 | 1                                       | 4.147849  | 1.845673  | -2.574345 |
| 1                                       | 2.823179  | 3.440437  | -1.532389 | 1                                       | 4.464109  | 1.662403  | -0.844524 |
| 1                                       | 1.903854  | 3.520519  | -0.016293 | 1                                       | 4.006987  | 0.258941  | -1.808065 |
| 1                                       | 3.328198  | 2.498471  | -0.123834 | 1                                       | -1.510413 | -1.259910 | -2.474301 |
| 1                                       | -1.986012 | -1.810122 | -2.374241 | 1                                       | -1.495328 | -0.143166 | 1.655484  |
| 1                                       | -1.661622 | -1.145799 | 1.839681  | 1                                       | -3.882835 | -1.944093 | -2.267599 |
| 1                                       | -4.070340 | -3.068764 | -2.016359 | 1                                       | -3.857099 | -0.806664 | 1.838610  |
| 1                                       | -3.754084 | -2.385857 | 2.194224  | 1                                       | 0.461089  | -0.372848 | -1.574014 |
| 1                                       | -0.172389 | -0.553645 | -1.586858 | 6                                       | -5.424830 | -1.837344 | -0.148160 |
| 7                                       | -6.226064 | -4.120670 | 0.491565  | 8                                       | -5.964040 | -1.660940 | 1.057422  |
| NImag = 1 (-333.0222 cm <sup>-1</sup> ) |           |           |           | 8                                       | -6.034536 | -2.296835 | -1.077642 |
|                                         |           |           |           | 6                                       | -7.318545 | -2.051986 | 1.173352  |
|                                         |           |           |           | 1                                       | -7.598669 | -1.847317 | 2.199944  |
|                                         |           |           |           | 1                                       | -7.940545 | -1.482045 | 0.488949  |
|                                         |           |           |           | 1                                       | -7.431416 | -3.109574 | 0.952164  |
|                                         |           |           |           | NImag = 1 (-320.2375 cm <sup>-1</sup> ) |           |           |           |
| <b>TSf1- trans(Cl)</b>                  |           |           |           | <b>TSf1- trans(H)</b>                   |           |           |           |
| Et = -1708.5162919                      |           |           |           | Et = -1248.9143699                      |           |           |           |
| Gsol = -1708.831358                     |           |           |           | Gsol = -1249.205508                     |           |           |           |
| 6                                       | -2.494208 | -1.654365 | -1.371600 | 7                                       | -2.711806 | -0.410968 | 1.406695  |
| 6                                       | -1.791109 | -1.083163 | -0.308606 | 6                                       | -2.315555 | 0.513861  | 0.511424  |
| 6                                       | -2.363609 | -1.120579 | 0.965631  | 7                                       | -3.198492 | 0.562732  | -0.514100 |
| 6                                       | -3.603576 | -1.688841 | 1.167536  | 6                                       | -4.344936 | -0.269876 | -0.217676 |
| 6                                       | -4.287933 | -2.228333 | 0.088470  | 6                                       | -3.759226 | -1.226757 | 0.822208  |
| 6                                       | -3.741211 | -2.214670 | -1.184469 | 8                                       | -1.345279 | 1.280535  | 0.645561  |
| 6                                       | -0.563782 | -0.386344 | -0.590451 | 6                                       | -3.301207 | 1.711741  | -1.363895 |
| 6                                       | -0.019386 | 0.773032  | 0.169537  | 6                                       | -4.945208 | -0.943758 | -1.429658 |
| 6                                       | -0.792866 | 2.023795  | -0.260190 | 6                                       | -4.772341 | -1.725936 | 1.826211  |
| 8                                       | -0.431527 | 3.068742  | 0.465900  | 6                                       | -1.770126 | -0.979475 | 2.333357  |
| 6                                       | -0.981919 | 4.387398  | 0.231278  | 6                                       | 0.322696  | 1.020715  | -0.484051 |
| 6                                       | -0.643465 | 4.860024  | -1.171194 | 6                                       | 0.748838  | -0.283645 | 0.094404  |
| 17                                      | -5.843192 | -2.938469 | 0.338228  | 7                                       | -0.250643 | -1.228745 | -0.243863 |
| 7                                       | 1.381509  | 0.766569  | 0.018382  | 6                                       | -0.001516 | -1.804649 | -1.520504 |
| 6                                       | 1.887002  | 1.498928  | -1.105908 | 6                                       | -1.156954 | -2.678343 | -1.960429 |
| 6                                       | 2.886868  | 2.564791  | -0.670113 | 6                                       | 0.841970  | 2.317494  | -0.123511 |
| 8                                       | -1.600021 | 2.037954  | -1.154908 | 6                                       | 1.408620  | 2.578236  | 1.126843  |
| 6                                       | -0.273613 | 5.240356  | 1.266099  | 6                                       | 2.000408  | 3.798290  | 1.383915  |
| 6                                       | -2.479284 | 4.378467  | 0.484048  | 6                                       | 2.040518  | 4.777341  | 0.400101  |
| 8                                       | 0.533265  | -1.942157 | 0.237956  | 6                                       | 1.476672  | 4.533251  | -0.842658 |
| 6                                       | 1.773120  | -1.844926 | 0.238442  | 6                                       | 0.872788  | 3.316875  | -1.098144 |
| 7                                       | 2.541563  | -1.657893 | 1.336353  | 6                                       | 2.189020  | -0.593394 | -0.322310 |
| 6                                       | 3.899067  | -1.372344 | 0.915863  | 8                                       | 2.767650  | -0.047719 | -1.225723 |

|                                                                     |           |           |           |                                                                      |           |           |           |
|---------------------------------------------------------------------|-----------|-----------|-----------|----------------------------------------------------------------------|-----------|-----------|-----------|
| 6                                                                   | 3.957730  | -2.044767 | -0.458640 | 8                                                                    | 2.685032  | -1.564895 | 0.432747  |
| 7                                                                   | 2.562850  | -2.046164 | -0.835891 | 6                                                                    | 4.014536  | -2.091157 | 0.220115  |
| 6                                                                   | 1.995904  | -0.961302 | 2.467969  | 6                                                                    | 4.127539  | -3.167804 | 1.282726  |
| 6                                                                   | 2.087550  | -2.648245 | -2.042629 | 6                                                                    | 5.049008  | -1.003436 | 0.451549  |
| 6                                                                   | 4.855277  | -1.339199 | -1.450161 | 6                                                                    | 4.131754  | -2.699439 | -1.166191 |
| 6                                                                   | 4.949849  | -1.868925 | 1.882032  | 1                                                                    | -4.326878 | -2.428703 | 2.526965  |
| 1                                                                   | 4.893354  | -1.346195 | 2.834663  | 1                                                                    | -5.581527 | -2.247298 | 1.316739  |
| 1                                                                   | 5.946676  | -1.697685 | 1.477597  | 1                                                                    | -5.195161 | -0.896588 | 2.390942  |
| 1                                                                   | 4.828775  | -2.935098 | 2.066811  | 1                                                                    | -3.288681 | -2.071167 | 0.307059  |
| 1                                                                   | 3.986606  | -0.288100 | 0.782777  | 1                                                                    | -5.113605 | 0.349831  | 0.265143  |
| 1                                                                   | 4.295488  | -3.083213 | -0.340063 | 1                                                                    | -5.772392 | -1.586100 | -1.131247 |
| 1                                                                   | 5.877033  | -1.306401 | -1.074356 | 1                                                                    | -5.339781 | -0.211701 | -2.132358 |
| 1                                                                   | 4.877139  | -1.859028 | -2.406697 | 1                                                                    | -4.203842 | -1.550890 | -1.943527 |
| 1                                                                   | 4.513427  | -0.319767 | -1.616866 | 1                                                                    | -3.346927 | 1.420858  | -2.411603 |
| 1                                                                   | 2.305384  | -2.026684 | -2.910050 | 1                                                                    | -2.426159 | 2.332869  | -1.203988 |
| 1                                                                   | 1.013422  | -2.775858 | -1.956052 | 1                                                                    | -4.192414 | 2.297852  | -1.124624 |
| 1                                                                   | 2.543975  | -3.629371 | -2.193569 | 1                                                                    | -1.138266 | -1.704175 | 1.813705  |
| 1                                                                   | 2.004600  | 0.114000  | 2.275236  | 1                                                                    | -1.148448 | -0.177792 | 2.719128  |
| 1                                                                   | 0.972821  | -1.293563 | 2.610045  | 1                                                                    | -2.305720 | -1.428950 | 3.165439  |
| 1                                                                   | 2.565747  | -1.205395 | 3.361082  | 1                                                                    | 3.356354  | -3.922554 | 1.142769  |
| 1                                                                   | 0.802389  | 5.222764  | 1.105325  | 1                                                                    | 4.009041  | -2.738239 | 2.275738  |
| 1                                                                   | -0.475554 | 4.869375  | 2.269027  | 1                                                                    | 5.101826  | -3.650273 | 1.227470  |
| 1                                                                   | -0.617660 | 6.271033  | 1.201730  | 1                                                                    | 4.912062  | -0.556835 | 1.435484  |
| 1                                                                   | -2.690853 | 3.992919  | 1.480416  | 1                                                                    | 6.047884  | -1.436025 | 0.412204  |
| 1                                                                   | -2.863841 | 5.395807  | 0.426702  | 1                                                                    | 4.973799  | -0.226052 | -0.301681 |
| 1                                                                   | -2.996951 | 3.767267  | -0.247921 | 1                                                                    | 5.099474  | -3.189887 | -1.265634 |
| 1                                                                   | -0.943031 | 5.901174  | -1.283997 | 1                                                                    | 4.043166  | -1.940466 | -1.936349 |
| 1                                                                   | -1.155679 | 4.266302  | -1.921102 | 1                                                                    | 3.354708  | -3.446935 | -1.316829 |
| 1                                                                   | 0.429943  | 4.795287  | -1.341790 | 1                                                                    | 0.774727  | -0.161404 | 1.182142  |
| 1                                                                   | -0.267046 | 0.628110  | 1.228032  | 1                                                                    | 0.175366  | -1.037396 | -2.307720 |
| 1                                                                   | 2.404526  | 0.833219  | -1.815811 | 1                                                                    | 0.921570  | -2.414235 | -1.549673 |
| 1                                                                   | 1.109865  | 1.993066  | -1.708295 | 1                                                                    | -0.962384 | -3.156792 | -2.920366 |
| 1                                                                   | 3.321315  | 3.087934  | -1.524596 | 1                                                                    | -1.340352 | -3.455017 | -1.218525 |
| 1                                                                   | 2.399731  | 3.289328  | -0.020306 | 1                                                                    | -2.061310 | -2.078429 | -2.050269 |
| 1                                                                   | 3.696723  | 2.108980  | -0.100631 | 1                                                                    | 0.440113  | 3.121315  | -2.069159 |
| 1                                                                   | -2.064485 | -1.635754 | -2.362547 | 1                                                                    | 1.361123  | 1.828598  | 1.901423  |
| 1                                                                   | -1.821805 | -0.724322 | 1.809732  | 1                                                                    | 1.504660  | 5.292684  | -1.610002 |
| 1                                                                   | -4.286142 | -2.642566 | -2.010893 | 1                                                                    | 2.430953  | 3.992006  | 2.355323  |
| 1                                                                   | -4.041848 | -1.722588 | 2.152447  | 1                                                                    | -0.146327 | 0.942713  | -1.453601 |
| 1                                                                   | -0.183402 | -0.469640 | -1.597115 | 1                                                                    | 2.506914  | 5.729868  | 0.604725  |
| NImag = 1 (-332.3647 cm <sup>-1</sup> )                             |           |           |           | NImag = 1 (-316.5466 cm <sup>-1</sup> )                              |           |           |           |
| <b>TSfl- trans(Me)</b><br>Et = -1288.2254452<br>Gsol = -1288.521731 |           |           |           | <b>TSfl- trans(OMe)</b><br>Et = -1363.4019512<br>Gsol = -1363.722228 |           |           |           |

|   |           |           |           |   |           |           |           |
|---|-----------|-----------|-----------|---|-----------|-----------|-----------|
| 7 | -2.878740 | 0.015648  | 1.421916  | 6 | -1.979378 | -2.196338 | -1.085682 |
| 6 | -2.298625 | 0.804654  | 0.497646  | 6 | -1.514606 | -1.266674 | -0.156989 |
| 7 | -3.155312 | 1.005390  | -0.532226 | 6 | -2.228937 | -1.119054 | 1.040419  |
| 6 | -4.449700 | 0.440797  | -0.214330 | 6 | -3.359342 | -1.857019 | 1.282417  |
| 6 | -4.075039 | -0.581698 | 0.859747  | 6 | -3.820953 | -2.768784 | 0.330178  |
| 8 | -1.188445 | 1.353353  | 0.610562  | 6 | -3.124626 | -2.936324 | -0.862371 |
| 6 | -3.018970 | 2.124135  | -1.416573 | 6 | -0.395421 | -0.436957 | -0.497039 |
| 6 | -5.179737 | -0.135131 | -1.405420 | 6 | -0.084202 | 0.906112  | 0.078607  |
| 6 | -5.167422 | -0.824159 | 1.875534  | 6 | -1.173031 | 1.899890  | -0.337795 |
| 6 | -2.075875 | -0.707313 | 2.371269  | 8 | -1.116111 | 2.986887  | 0.421675  |
| 6 | 0.372215  | 0.714711  | -0.527076 | 6 | -1.996950 | 4.111793  | 0.207184  |
| 6 | 0.517830  | -0.633112 | 0.093362  | 6 | -1.785765 | 4.700631  | -1.176360 |
| 7 | -0.657386 | -1.366592 | -0.200422 | 8 | -4.936944 | -3.437007 | 0.656172  |
| 6 | -0.552230 | -2.020209 | -1.459656 | 7 | 1.252221  | 1.235682  | -0.252620 |
| 6 | -1.860056 | -2.677903 | -1.846202 | 6 | 1.327613  | 1.845128  | -1.535971 |
| 6 | 1.162722  | 1.878371  | -0.221418 | 6 | 2.767355  | 2.048354  | -1.958822 |
| 6 | 1.827766  | 2.038663  | 0.997370  | 8 | -1.945008 | 1.725865  | -1.245437 |
| 6 | 2.663313  | 3.114728  | 1.202595  | 6 | -1.555978 | 5.095820  | 1.274148  |
| 6 | 2.874186  | 4.066151  | 0.205215  | 6 | -3.440110 | 3.694433  | 0.432102  |
| 6 | 2.205416  | 3.910600  | -1.004067 | 8 | 0.910115  | -1.498663 | 0.646647  |
| 6 | 1.356144  | 2.841931  | -1.211986 | 6 | 2.133647  | -1.312118 | 0.522553  |
| 6 | 1.858158  | -1.246294 | -0.323467 | 7 | 2.930778  | -0.706501 | 1.424047  |
| 8 | 2.532389  | -0.848770 | -1.238249 | 6 | 4.244553  | -0.509556 | 0.841309  |
| 8 | 2.146149  | -2.288734 | 0.445098  | 6 | 4.291468  | -1.638622 | -0.188844 |
| 6 | 3.334212  | -3.083894 | 0.232796  | 7 | 2.885900  | -1.799499 | -0.493662 |
| 6 | 3.229465  | -4.144938 | 1.311690  | 6 | 2.389354  | 0.258820  | 2.343135  |
| 6 | 4.575413  | -2.233489 | 0.441585  | 6 | 2.414550  | -2.853415 | -1.340852 |
| 6 | 3.309717  | -3.723407 | -1.144160 | 6 | 5.154810  | -1.355968 | -1.396273 |
| 1 | -4.875637 | -1.579434 | 2.602162  | 6 | 5.369819  | -0.557397 | 1.848736  |
| 1 | -6.068724 | -1.183207 | 1.380622  | 1 | 5.320189  | 0.279478  | 2.542035  |
| 1 | -5.407135 | 0.094014  | 2.409542  | 1 | 6.331820  | -0.499425 | 1.341366  |
| 1 | -3.792360 | -1.522571 | 0.375366  | 1 | 5.335138  | -1.482575 | 2.421987  |
| 1 | -5.071748 | 1.223372  | 0.242697  | 1 | 4.243677  | 0.452450  | 0.317539  |
| 1 | -6.116351 | -0.590292 | -1.086775 | 1 | 4.651886  | -2.552916 | 0.303588  |
| 1 | -5.425296 | 0.639020  | -2.130605 | 1 | 6.187468  | -1.195973 | -1.089759 |
| 1 | -4.577694 | -0.893343 | -1.900260 | 1 | 5.148445  | -2.194204 | -2.091178 |
| 1 | -3.124330 | 1.817987  | -2.455685 | 1 | 4.808622  | -0.469228 | -1.921483 |
| 1 | -2.034433 | 2.555933  | -1.269539 | 1 | 2.601867  | -2.628145 | -2.389163 |
| 1 | -3.770082 | 2.888376  | -1.199993 | 1 | 1.346459  | -2.962626 | -1.184452 |
| 1 | -1.614968 | -1.567818 | 1.880189  | 1 | 2.900768  | -3.801361 | -1.095239 |
| 1 | -1.296433 | -0.043183 | 2.730867  | 1 | 2.202906  | 1.197558  | 1.815258  |
| 1 | -2.692236 | -1.003082 | 3.216215  | 1 | 1.451337  | -0.128420 | 2.728281  |
| 1 | 2.314750  | -4.721259 | 1.189277  | 1 | 3.074654  | 0.388542  | 3.176710  |
| 1 | 3.214680  | -3.686027 | 2.298515  | 1 | -0.507710 | 5.354995  | 1.140629  |
| 1 | 4.079342  | -4.823101 | 1.257088  | 1 | -1.677491 | 4.663795  | 2.265762  |
| 1 | 4.541001  | -1.751477 | 1.417762  | 1 | -2.150880 | 6.005737  | 1.216639  |

|                                                                     |           |           |           |                                                                               |           |           |           |
|---------------------------------------------------------------------|-----------|-----------|-----------|-------------------------------------------------------------------------------|-----------|-----------|-----------|
| 1                                                                   | 5.461345  | -2.866364 | 0.407850  | 1                                                                             | -3.550475 | 3.237021  | 1.414503  |
| 1                                                                   | 4.660517  | -1.470258 | -0.324923 | 1                                                                             | -4.084622 | 4.571716  | 0.393317  |
| 1                                                                   | 4.154279  | -4.404560 | -1.242465 | 1                                                                             | -3.764642 | 2.987036  | -0.323953 |
| 1                                                                   | 3.371547  | -2.973473 | -1.925613 | 1                                                                             | -2.373177 | 5.612917  | -1.274858 |
| 1                                                                   | 2.393407  | -4.296022 | -1.277085 | 1                                                                             | -2.089118 | 4.002913  | -1.949668 |
| 1                                                                   | 0.585083  | -0.482637 | 1.175999  | 1                                                                             | -0.736862 | 4.953125  | -1.321697 |
| 1                                                                   | -0.255178 | -1.327293 | -2.279562 | 1                                                                             | -0.170978 | 0.813189  | 1.166387  |
| 1                                                                   | 0.238457  | -2.794160 | -1.484334 | 1                                                                             | 0.814339  | 1.252820  | -2.327813 |
| 1                                                                   | -1.780592 | -3.215389 | -2.791296 | 1                                                                             | 0.818200  | 2.827125  | -1.586194 |
| 1                                                                   | -2.165317 | -3.382277 | -1.072909 | 1                                                                             | 2.841479  | 2.556193  | -2.920736 |
| 1                                                                   | -2.640945 | -1.925239 | -1.942356 | 1                                                                             | 3.293076  | 2.643319  | -1.212417 |
| 1                                                                   | 0.850183  | 2.734193  | -2.161158 | 1                                                                             | 3.271234  | 1.086160  | -2.037057 |
| 1                                                                   | 1.666433  | 1.327026  | 1.792281  | 1                                                                             | -1.444164 | -2.324043 | -2.016041 |
| 1                                                                   | 2.349639  | 4.639247  | -1.789507 | 1                                                                             | -1.878544 | -0.426971 | 1.790356  |
| 1                                                                   | 3.162946  | 3.226820  | 2.154930  | 1                                                                             | -3.462863 | -3.633091 | -1.611930 |
| 1                                                                   | -0.128900 | 0.709570  | -1.483775 | 1                                                                             | -3.913493 | -1.754119 | 2.202459  |
| 6                                                                   | 3.811402  | 5.211916  | 0.428744  | 1                                                                             | 0.077331  | -0.630423 | -1.448720 |
| 1                                                                   | 3.618940  | 6.025986  | -0.266681 | 6                                                                             | -5.449770 | -4.366924 | -0.257703 |
| 1                                                                   | 3.726192  | 5.603553  | 1.440967  | 1                                                                             | -6.340922 | -4.779690 | 0.201682  |
| 1                                                                   | 4.847125  | 4.898788  | 0.288862  | 1                                                                             | -5.719499 | -3.890927 | -1.200921 |
|                                                                     |           |           |           | 1                                                                             | -4.738742 | -5.171355 | -0.448551 |
| NImag = 1 (-315.4680 cm <sup>-1</sup> )                             |           |           |           | NImag = 1 (-316.6104 cm <sup>-1</sup> )                                       |           |           |           |
| <b>TSf1- trans(OH)</b><br>Et = -1324.1060197<br>Gsol = -1324.434054 |           |           |           | <b>TSf2- cis(NO<sub>2</sub>)</b><br>Et = -1453.3198294<br>Gsol = -1453.669603 |           |           |           |
| 6                                                                   | 1.317096  | 2.905444  | -1.171730 | 6                                                                             | 2.430594  | -1.265083 | -1.346677 |
| 6                                                                   | 1.170256  | 1.900443  | -0.214045 | 6                                                                             | 1.685661  | -0.219734 | -0.784038 |
| 6                                                                   | 1.883293  | 2.023094  | 0.985285  | 6                                                                             | 2.326067  | 0.671809  | 0.080457  |
| 6                                                                   | 2.716556  | 3.092229  | 1.210748  | 6                                                                             | 3.661000  | 0.507888  | 0.396545  |
| 6                                                                   | 2.864131  | 4.072623  | 0.232477  | 6                                                                             | 4.353659  | -0.554925 | -0.150333 |
| 6                                                                   | 2.161394  | 3.975254  | -0.963295 | 6                                                                             | 3.757204  | -1.446493 | -1.027345 |
| 6                                                                   | 0.378188  | 0.746095  | -0.526845 | 6                                                                             | 0.317310  | -0.009423 | -1.236075 |
| 6                                                                   | 0.515688  | -0.609605 | 0.084342  | 6                                                                             | -0.715480 | 0.743344  | -0.464646 |
| 6                                                                   | 1.862700  | -1.211775 | -0.328816 | 6                                                                             | -0.550191 | 2.250940  | -0.678151 |
| 8                                                                   | 2.155960  | -2.253802 | 0.438215  | 8                                                                             | -1.551071 | 2.904092  | -0.114730 |
| 6                                                                   | 3.347274  | -3.043393 | 0.224836  | 6                                                                             | -1.652044 | 4.348359  | -0.169421 |
| 6                                                                   | 3.326277  | -3.680367 | -1.153345 | 6                                                                             | -0.450547 | 4.991406  | 0.499612  |
| 8                                                                   | 3.696173  | 5.093145  | 0.502102  | 7                                                                             | -0.831513 | 0.207152  | 0.836070  |
| 7                                                                   | -0.648014 | -1.356399 | -0.219787 | 6                                                                             | -0.169115 | 0.904509  | 1.886546  |
| 6                                                                   | -0.533829 | -1.991479 | -1.487844 | 6                                                                             | -0.946537 | 0.819837  | 3.191017  |
| 6                                                                   | -1.832268 | -2.664868 | -1.879479 | 8                                                                             | 0.351379  | 2.752967  | -1.301036 |
| 8                                                                   | 2.536886  | -0.808790 | -1.241791 | 6                                                                             | -2.914129 | 4.627821  | 0.623523  |
| 6                                                                   | 3.246287  | -4.107087 | 1.301523  | 6                                                                             | -1.813414 | 4.803693  | -1.608893 |
| 6                                                                   | 4.585054  | -2.188555 | 0.436091  | 8                                                                             | -0.375390 | -1.829575 | -1.223581 |
| 8                                                                   | -1.201429 | 1.369351  | 0.595256  |                                                                               |           |           |           |

|   |           |           |           |   |           |           |           |
|---|-----------|-----------|-----------|---|-----------|-----------|-----------|
| 6 | -2.300310 | 0.795458  | 0.494500  | 6 | -1.365744 | -2.227519 | -0.570124 |
| 7 | -2.856596 | -0.002063 | 1.426591  | 7 | -2.638317 | -2.152049 | -1.007614 |
| 6 | -4.042710 | -0.627530 | 0.873252  | 6 | -3.523470 | -2.913440 | -0.148524 |
| 6 | -4.451986 | 0.388720  | -0.193609 | 6 | -2.665360 | -3.069952 | 1.120741  |
| 7 | -3.173043 | 0.979479  | -0.525519 | 7 | -1.322870 | -2.890619 | 0.590842  |
| 6 | -2.029944 | -0.711109 | 2.366375  | 6 | -2.996852 | -1.729721 | -2.327758 |
| 6 | -3.068686 | 2.099453  | -1.411789 | 6 | -0.154373 | -2.893674 | 1.424423  |
| 6 | -5.184988 | -0.199318 | -1.376952 | 6 | -3.004787 | -2.050868 | 2.189623  |
| 6 | -5.119382 | -0.900821 | 1.897860  | 6 | -3.925623 | -4.245354 | -0.757338 |
| 1 | -4.803196 | -1.652638 | 2.617781  | 1 | -4.482522 | -4.117152 | -1.683570 |
| 1 | -6.016479 | -1.278816 | 1.409459  | 1 | -4.563658 | -4.791958 | -0.064632 |
| 1 | -5.376042 | 0.008610  | 2.438987  | 1 | -3.045184 | -4.852338 | -0.964459 |
| 1 | -3.739752 | -1.558793 | 0.382641  | 1 | -4.413586 | -2.322893 | 0.069918  |
| 1 | -5.084023 | 1.157651  | 0.272988  | 1 | -2.761920 | -4.083077 | 1.513490  |
| 1 | -6.109514 | -0.671487 | -1.047995 | 1 | -4.059015 | -2.126473 | 2.454832  |
| 1 | -5.452785 | 0.571020  | -2.098368 | 1 | -2.424394 | -2.224164 | 3.093710  |
| 1 | -4.575079 | -0.946111 | -1.879346 | 1 | -2.776369 | -1.048635 | 1.827525  |
| 1 | -3.178770 | 1.790744  | -2.449739 | 1 | -0.148618 | -2.038524 | 2.095583  |
| 1 | -2.091332 | 2.550360  | -1.274835 | 1 | 0.719929  | -2.830796 | 0.785513  |
| 1 | -3.832191 | 2.849297  | -1.187888 | 1 | -0.119023 | -3.823116 | 1.989723  |
| 1 | -1.555246 | -1.558946 | 1.865901  | 1 | -3.812219 | -1.008960 | -2.288818 |
| 1 | -1.263516 | -0.031021 | 2.724474  | 1 | -2.131472 | -1.261791 | -2.783601 |
| 1 | -2.633379 | -1.024566 | 3.214259  | 1 | -3.300718 | -2.568936 | -2.954569 |
| 1 | 2.333766  | -4.686501 | 1.177481  | 1 | -2.812618 | 4.259947  | 1.642412  |
| 1 | 3.229278  | -3.650259 | 2.289291  | 1 | -3.769933 | 4.135482  | 0.165865  |
| 1 | 4.098807  | -4.781868 | 1.245982  | 1 | -3.106686 | 5.698566  | 0.657002  |
| 1 | 4.548530  | -1.708964 | 1.413413  | 1 | -2.653033 | 4.289861  | -2.074929 |
| 1 | 5.473596  | -2.817714 | 0.401349  | 1 | -2.018335 | 5.873051  | -1.630506 |
| 1 | 4.667435  | -1.423249 | -0.328641 | 1 | -0.915224 | 4.610232  | -2.186393 |
| 1 | 4.173697  | -4.357897 | -1.252386 | 1 | -0.603378 | 6.068277  | 0.556185  |
| 1 | 3.385416  | -2.928609 | -1.933246 | 1 | 0.461302  | 4.798928  | -0.056002 |
| 1 | 2.412224  | -4.256120 | -1.287913 | 1 | -0.335159 | 4.612952  | 1.514021  |
| 1 | 0.575733  | -0.467236 | 1.168596  | 1 | -1.655640 | 0.532843  | -0.997757 |
| 1 | -0.250304 | -1.285787 | -2.302044 | 1 | 0.845429  | 0.504247  | 2.092530  |
| 1 | 0.267387  | -2.754682 | -1.525506 | 1 | -0.003606 | 1.974663  | 1.678457  |
| 1 | -1.746692 | -3.191968 | -2.829992 | 1 | -0.423887 | 1.341053  | 3.994201  |
| 1 | -2.125343 | -3.380936 | -1.112185 | 1 | -1.934293 | 1.262135  | 3.070204  |
| 1 | -2.624541 | -1.923050 | -1.966729 | 1 | -1.080160 | -0.216630 | 3.496150  |
| 1 | 0.777201  | 2.829794  | -2.104814 | 1 | 1.938100  | -1.954832 | -2.013307 |
| 1 | 1.766018  | 1.275201  | 1.753967  | 1 | 1.801202  | 1.530063  | 0.455461  |
| 1 | 2.275979  | 4.736345  | -1.723666 | 1 | 4.335582  | -2.256188 | -1.439719 |
| 1 | 3.264563  | 3.194958  | 2.134333  | 1 | 4.169848  | 1.194603  | 1.051896  |
| 1 | -0.127539 | 0.751436  | -1.481165 | 1 | 0.181119  | -0.136112 | -2.300785 |
| 1 | 3.718376  | 5.698014  | -0.240932 | 7 | 5.751619  | -0.735736 | 0.192605  |
|   |           |           |           | 8 | 6.336570  | -1.667942 | -0.310427 |
|   |           |           |           | 8 | 6.248855  | 0.054700  | 0.961283  |

NImag = 1 (-314.3856 cm<sup>-1</sup>)

|                                                                   |           |           |           | NImag = 1 (-351.9804 cm <sup>-1</sup> )                              |           |           |           |
|-------------------------------------------------------------------|-----------|-----------|-----------|----------------------------------------------------------------------|-----------|-----------|-----------|
| <b>TSf2- cis(CN)</b><br>Et = -1341.1081237<br>Gsol = -1341.420875 |           |           |           | <b>TSf2- cis(COOMe)</b><br>Et = -1476.7054774<br>Gsol = -1477.054256 |           |           |           |
| 6                                                                 | 1.978339  | -2.247277 | -1.333146 | 6                                                                    | 2.315514  | -0.891613 | -1.340257 |
| 6                                                                 | 1.702975  | -1.002787 | -0.752317 | 6                                                                    | 1.432356  | 0.033048  | -0.768247 |
| 6                                                                 | 2.634178  | -0.458144 | 0.134729  | 6                                                                    | 1.945432  | 0.998092  | 0.101480  |
| 6                                                                 | 3.787912  | -1.148073 | 0.452521  | 6                                                                    | 3.293250  | 1.017287  | 0.404852  |
| 6                                                                 | 4.029421  | -2.399300 | -0.105404 | 6                                                                    | 4.152026  | 0.074455  | -0.141996 |
| 6                                                                 | 3.117973  | -2.947019 | -1.009103 | 6                                                                    | 3.655838  | -0.882577 | -1.024089 |
| 6                                                                 | 0.540036  | -0.256151 | -1.207627 | 6                                                                    | 0.048258  | 0.057300  | -1.215305 |
| 6                                                                 | -0.126337 | 0.834263  | -0.433040 | 6                                                                    | -1.090455 | 0.654364  | -0.448160 |
| 6                                                                 | 0.625710  | 2.154562  | -0.628417 | 6                                                                    | -1.130985 | 2.169845  | -0.673024 |
| 8                                                                 | -0.053450 | 3.152217  | -0.089919 | 8                                                                    | -2.208316 | 2.689127  | -0.108760 |
| 6                                                                 | 0.414941  | 4.521379  | -0.154872 | 6                                                                    | -2.501698 | 4.104702  | -0.179755 |
| 6                                                                 | 1.754332  | 4.660629  | 0.545808  | 6                                                                    | -1.395309 | 4.910523  | 0.477275  |
| 7                                                                 | -0.468946 | 0.385868  | 0.859967  | 6                                                                    | -1.166522 | 0.117976  | 0.853038  |
| 6                                                                 | 0.406774  | 0.752584  | 1.921618  | 6                                                                    | -0.585465 | 0.887458  | 1.901449  |
| 6                                                                 | -0.350668 | 0.966649  | 3.222903  | 6                                                                    | -1.337957 | 0.702886  | 3.210194  |
| 8                                                                 | 1.670719  | 2.259037  | -1.220543 | 8                                                                    | -0.311199 | 2.784306  | -1.308676 |
| 6                                                                 | -0.660075 | 5.281105  | 0.598075  | 6                                                                    | -3.788135 | 4.222814  | 0.614708  |
| 6                                                                 | 0.478942  | 4.978719  | -1.601388 | 6                                                                    | -2.725468 | 4.518298  | -1.623691 |
| 8                                                                 | -0.828376 | -1.651389 | -1.239209 | 8                                                                    | -0.394244 | -1.849782 | -1.207247 |
| 6                                                                 | -1.901404 | -1.630677 | -0.596043 | 6                                                                    | -1.337411 | -2.364494 | -0.568119 |
| 7                                                                 | -3.033941 | -1.048056 | -1.036735 | 7                                                                    | -2.604969 | -2.441005 | -1.021038 |
| 6                                                                 | -4.156549 | -1.393178 | -0.187957 | 6                                                                    | -3.409593 | -3.290073 | -0.166455 |
| 6                                                                 | -3.444151 | -1.903072 | 1.079047  | 6                                                                    | -2.548013 | -3.356592 | 1.108749  |
| 7                                                                 | -2.138135 | -2.270778 | 0.554802  | 7                                                                    | -1.230229 | -3.021667 | 0.593147  |
| 6                                                                 | -3.180263 | -0.494560 | -2.348585 | 6                                                                    | -2.997038 | -2.058190 | -2.343024 |
| 6                                                                 | -1.074673 | -2.745437 | 1.394012  | 6                                                                    | -0.083321 | -2.870725 | 1.443266  |
| 6                                                                 | -3.355064 | -0.851451 | 2.166377  | 6                                                                    | -3.012419 | -2.391272 | 2.180619  |
| 6                                                                 | -5.065256 | -2.435833 | -0.815397 | 6                                                                    | -3.668961 | -4.656296 | -0.776889 |
| 1                                                                 | -5.516632 | -2.078062 | -1.738919 | 1                                                                    | -4.233899 | -4.585902 | -1.704589 |
| 1                                                                 | -5.874419 | -2.683296 | -0.129980 | 1                                                                    | -4.247851 | -5.267480 | -0.086083 |
| 1                                                                 | -4.509206 | -3.346944 | -1.032870 | 1                                                                    | -2.729363 | -5.167569 | -0.982807 |
| 1                                                                 | -4.729146 | -0.493584 | 0.039679  | 1                                                                    | -4.357607 | -2.795581 | 0.047696  |
| 1                                                                 | -3.943597 | -2.798290 | 1.452128  | 1                                                                    | -2.531702 | -4.377336 | 1.493869  |
| 1                                                                 | -4.353520 | -0.504336 | 2.431239  | 1                                                                    | -4.053169 | -2.590722 | 2.435220  |
| 1                                                                 | -2.897575 | -1.257588 | 3.066456  | 1                                                                    | -2.423582 | -2.502785 | 3.089112  |
| 1                                                                 | -2.742850 | -0.018162 | 1.821489  | 1                                                                    | -2.896930 | -1.367041 | 1.825255  |
| 1                                                                 | -0.715729 | -1.958918 | 2.053115  | 1                                                                    | -0.185214 | -1.999348 | 2.085179  |
| 1                                                                 | -0.253411 | -3.060874 | 0.759370  | 1                                                                    | 0.789935  | -2.730864 | 0.815117  |
| 1                                                                 | -1.427618 | -3.598007 | 1.971167  | 1                                                                    | 0.043288  | -3.773775 | 2.037553  |
| 1                                                                 | -3.631612 | 0.495204  | -2.296886 | 1                                                                    | -3.886077 | -1.429921 | -2.310844 |
| 1                                                                 | -2.195795 | -0.412771 | -2.795604 |                                                                      |           |           |           |



|                                         |           |           |           |                                         |           |           |           |
|-----------------------------------------|-----------|-----------|-----------|-----------------------------------------|-----------|-----------|-----------|
| 1                                       | -3.795293 | -1.126934 | -2.990058 | 1                                       | -2.183398 | -1.498642 | -2.791032 |
| 1                                       | -0.734260 | 4.920792  | 1.622003  | 1                                       | -3.203175 | -2.924627 | -2.972879 |
| 1                                       | -1.627960 | 5.149431  | 0.118381  | 1                                       | -3.636066 | 3.883466  | 1.637196  |
| 1                                       | -0.424492 | 6.343552  | 0.618412  | 1                                       | -4.571181 | 3.614644  | 0.166024  |
| 1                                       | -0.482770 | 4.823854  | -2.088715 | 1                                       | -4.122433 | 5.258522  | 0.636731  |
| 1                                       | 0.707532  | 6.042911  | -1.636910 | 1                                       | -3.491778 | 3.893276  | -2.080205 |
| 1                                       | 1.244269  | 4.439749  | -2.150433 | 1                                       | -3.068121 | 5.551524  | -1.657225 |
| 1                                       | 2.026697  | 5.714011  | 0.596109  | 1                                       | -1.810426 | 4.434724  | -2.200960 |
| 1                                       | 2.534812  | 4.124867  | 0.015828  | 1                                       | -1.690499 | 5.957896  | 0.525148  |
| 1                                       | 1.689656  | 4.279324  | 1.563629  | 1                                       | -0.468222 | 4.835075  | -0.081186 |
| 1                                       | -1.063194 | 1.015418  | -0.982334 | 1                                       | -1.225981 | 4.559977  | 1.494110  |
| 1                                       | 1.181049  | -0.016063 | 2.126362  | 1                                       | -1.983092 | 0.317079  | -0.998444 |
| 1                                       | 0.981588  | 1.674432  | 1.728390  | 1                                       | 0.472990  | 0.620252  | 2.101172  |
| 1                                       | 0.328660  | 1.233307  | 4.033764  | 1                                       | -0.558538 | 1.971767  | 1.697335  |
| 1                                       | -1.085066 | 1.762046  | 3.104709  | 1                                       | -0.880336 | 1.282981  | 4.012959  |
| 1                                       | -0.882106 | 0.062599  | 3.515637  | 1                                       | -2.374289 | 1.017879  | 3.096206  |
| 1                                       | 1.261661  | -2.671530 | -2.018358 | 1                                       | -1.339368 | -0.343232 | 3.512789  |
| 1                                       | 2.490097  | 0.531760  | 0.525272  | 1                                       | 1.921978  | -1.639397 | -2.010736 |
| 1                                       | 3.314106  | -3.912981 | -1.448025 | 1                                       | 1.305455  | 1.769620  | 0.486900  |
| 1                                       | 4.508565  | -0.715417 | 1.128744  | 1                                       | 4.324998  | -1.609191 | -1.456509 |
| 1                                       | 0.377623  | -0.303701 | -2.275088 | 1                                       | 3.699076  | 1.767349  | 1.065698  |
| 6                                       | 5.214733  | -3.118595 | 0.235889  | 1                                       | -0.071244 | -0.085533 | -2.279977 |
| 7                                       | 6.169284  | -3.701998 | 0.511046  | 6                                       | 5.581504  | 0.139908  | 0.232426  |
| NImag = 1 (-353.5819 cm <sup>-1</sup> ) |           |           |           | 8                                       | 6.310562  | -0.808681 | -0.355524 |
|                                         |           |           |           | 8                                       | 6.050376  | 0.953147  | 0.983941  |
|                                         |           |           |           | 6                                       | 7.687817  | -0.793091 | -0.034399 |
|                                         |           |           |           | 1                                       | 8.129554  | -1.615342 | -0.585010 |
|                                         |           |           |           | 1                                       | 8.139206  | 0.149236  | -0.331897 |
|                                         |           |           |           | 1                                       | 7.833078  | -0.929380 | 1.033575  |
|                                         |           |           |           | NImag = 1 (-353.9391 cm <sup>-1</sup> ) |           |           |           |
| <b>TSf2- cis(Cl)</b>                    |           |           |           | <b>TSf2- cis(H)</b>                     |           |           |           |
| Et = -1708.5086467                      |           |           |           | Et = -1248.9031614                      |           |           |           |
| Gsol = -1708.823521                     |           |           |           | Gsol = -1249.193762                     |           |           |           |
| 6                                       | 2.309962  | -1.792906 | -1.329308 | 7                                       | 2.649667  | -1.348925 | -1.121470 |
| 6                                       | 1.778995  | -0.642603 | -0.733963 | 6                                       | 2.423109  | -0.135575 | -0.578005 |
| 6                                       | 2.571302  | 0.056351  | 0.178122  | 7                                       | 3.066632  | -0.038808 | 0.593543  |
| 6                                       | 3.841372  | -0.388012 | 0.498923  | 6                                       | 3.547363  | -1.345715 | 1.013980  |
| 6                                       | 4.325109  | -1.545545 | -0.082404 | 6                                       | 3.592341  | -2.105527 | -0.324611 |
| 6                                       | 3.566525  | -2.254811 | -1.002411 | 8                                       | 1.799308  | 0.782409  | -1.149768 |
| 6                                       | 0.498585  | -0.138676 | -1.194578 | 6                                       | -0.155999 | 1.051024  | -1.094693 |
| 6                                       | -0.385106 | 0.813931  | -0.442533 | 6                                       | -0.622238 | -0.205828 | -0.414088 |
| 6                                       | 0.121805  | 2.246045  | -0.650581 | 7                                       | -0.070435 | -0.368895 | 0.869711  |
| 8                                       | -0.719057 | 3.115023  | -0.115906 | 6                                       | -0.866055 | 0.064730  | 1.968309  |
| 6                                       | -0.484882 | 4.541921  | -0.175656 | 6                                       | -0.638680 | -0.803171 | 3.196773  |
| 6                                       | 0.811575  | 4.898699  | 0.529547  | 6                                       | 2.771801  | 1.010982  | 1.527453  |

|   |           |           |           |   |           |           |           |
|---|-----------|-----------|-----------|---|-----------|-----------|-----------|
| 7 | -0.685005 | 0.347424  | 0.851408  | 6 | 2.631799  | -1.999284 | 2.029409  |
| 6 | 0.109892  | 0.856362  | 1.917638  | 6 | 4.980993  | -2.139386 | -0.939104 |
| 6 | -0.698305 | 0.987166  | 3.199545  | 6 | 2.295911  | -1.693419 | -2.463815 |
| 8 | 1.130720  | 2.528955  | -1.247862 | 6 | -0.244332 | 2.396474  | -0.559594 |
| 6 | -1.671945 | 5.110319  | 0.577963  | 6 | -1.196763 | 2.756763  | 0.395635  |
| 6 | -0.494372 | 5.011110  | -1.619880 | 6 | -1.333340 | 4.079478  | 0.781822  |
| 8 | -0.577550 | -1.784299 | -1.206994 | 6 | -0.519852 | 5.057232  | 0.235657  |
| 6 | -1.648111 | -1.949731 | -0.583618 | 6 | 0.423679  | 4.714720  | -0.724555 |
| 7 | -2.861155 | -1.602900 | -1.058387 | 6 | 0.550153  | 3.401394  | -1.125809 |
| 6 | -3.916969 | -2.127835 | -0.217342 | 6 | -2.132902 | -0.354699 | -0.633447 |
| 6 | -3.147958 | -2.473344 | 1.071912  | 8 | -2.822159 | 0.465066  | -1.188141 |
| 7 | -1.785363 | -2.597741 | 0.580077  | 8 | -2.555996 | -1.518290 | -0.167835 |
| 6 | -3.081336 | -1.106255 | -2.381870 | 6 | -3.942088 | -1.919642 | -0.262172 |
| 6 | -0.667205 | -2.829839 | 1.449574  | 6 | -3.946103 | -3.280589 | 0.407486  |
| 6 | -3.284868 | -1.405173 | 2.138039  | 6 | -4.353185 | -2.041970 | -1.719164 |
| 6 | -4.611016 | -3.330309 | -0.832883 | 6 | -4.829360 | -0.951020 | 0.499435  |
| 1 | -5.103851 | -3.078502 | -1.770153 | 1 | 4.981859  | -2.625844 | -1.912899 |
| 1 | -5.373006 | -3.707668 | -0.152496 | 1 | 5.659995  | -2.694906 | -0.293827 |
| 1 | -3.894962 | -4.128871 | -1.023124 | 1 | 5.369740  | -1.128771 | -1.057747 |
| 1 | -4.646909 | -1.342540 | -0.017961 | 1 | 3.222192  | -3.122634 | -0.191575 |
| 1 | -3.478739 | -3.440212 | 1.454509  | 1 | 4.556222  | -1.242490 | 1.416513  |
| 1 | -4.337181 | -1.249929 | 2.375524  | 1 | 2.939520  | -3.030939 | 2.199630  |
| 1 | -2.780059 | -1.701336 | 3.055674  | 1 | 2.676307  | -1.480242 | 2.985112  |
| 1 | -2.833164 | -0.477481 | 1.786116  | 1 | 1.602188  | -1.960383 | 1.671046  |
| 1 | -0.487766 | -1.972101 | 2.092960  | 1 | 1.911925  | 0.755467  | 2.141755  |
| 1 | 0.213662  | -2.984576 | 0.835630  | 1 | 2.535138  | 1.908832  | 0.966273  |
| 1 | -0.852681 | -3.723595 | 2.042507  | 1 | 3.647783  | 1.195843  | 2.146680  |
| 1 | -3.703333 | -0.212486 | -2.356410 | 1 | 1.775988  | -2.650255 | -2.488183 |
| 1 | -2.119403 | -0.856569 | -2.815736 | 1 | 1.638080  | -0.922685 | -2.849981 |
| 1 | -3.561845 | -1.848876 | -3.020266 | 1 | 3.170510  | -1.753987 | -3.113141 |
| 1 | -1.689626 | 4.733395  | 1.598438  | 1 | -3.607564 | -3.198051 | 1.438164  |
| 1 | -2.603840 | 4.826336  | 0.092998  | 1 | -3.281703 | -3.965186 | -0.116150 |
| 1 | -1.612801 | 6.196809  | 0.608135  | 1 | -4.950941 | -3.699326 | 0.402263  |
| 1 | -1.415485 | 4.699744  | -2.110631 | 1 | -3.670903 | -2.706254 | -2.247913 |
| 1 | -0.446582 | 6.098805  | -1.649808 | 1 | -5.353970 | -2.467285 | -1.780483 |
| 1 | 0.351479  | 4.609368  | -2.168283 | 1 | -4.354109 | -1.073788 | -2.209105 |
| 1 | 0.908667  | 5.982415  | 0.580589  | 1 | -5.847986 | -1.336249 | 0.523845  |
| 1 | 1.670267  | 4.496454  | 0.002344  | 1 | -4.837654 | 0.027369  | 0.030534  |
| 1 | 0.806472  | 4.511066  | 1.547032  | 1 | -4.480784 | -0.849094 | 1.525905  |
| 1 | -1.321343 | 0.811329  | -1.022602 | 1 | -0.217037 | -1.006341 | -1.053157 |
| 1 | 0.985119  | 0.215860  | 2.156951  | 1 | -0.658496 | 1.111474  | 2.275328  |
| 1 | 0.547842  | 1.849887  | 1.714792  | 1 | -1.952054 | 0.051323  | 1.766121  |
| 1 | -0.084795 | 1.368552  | 4.017377  | 1 | -1.244280 | -0.464019 | 4.038955  |
| 1 | -1.538163 | 1.662870  | 3.044351  | 1 | -0.891919 | -1.838997 | 2.975380  |
| 1 | -1.099770 | 0.022002  | 3.504428  | 1 | 0.405854  | -0.774731 | 3.503400  |
| 1 | 1.703248  | -2.343433 | -2.031386 | 1 | 1.290726  | 3.124360  | -1.860388 |

|                                                                   |           |           |           |                                                                          |           |           |           |
|-------------------------------------------------------------------|-----------|-----------|-----------|--------------------------------------------------------------------------|-----------|-----------|-----------|
| 1                                                                 | 2.224492  | 0.984998  | 0.591396  | 1                                                                        | -1.869649 | 2.016774  | 0.787540  |
| 1                                                                 | 3.962511  | -3.151553 | -1.452356 | 1                                                                        | 1.055463  | 5.474976  | -1.159998 |
| 1                                                                 | 4.454672  | 0.165428  | 1.192138  | 1                                                                        | -2.085068 | 4.344510  | 1.510415  |
| 1                                                                 | 0.349551  | -0.232199 | -2.260698 | 1                                                                        | -0.017299 | 1.016397  | -2.165715 |
| 17                                                                | 5.905694  | -2.112323 | 0.331000  | 1                                                                        | -0.625858 | 6.086214  | 0.547458  |
| NImag = 1 (-347.3273 cm <sup>-1</sup> )                           |           |           |           | NImag = 1 (-339.8790 cm <sup>-1</sup> )                                  |           |           |           |
| <b>TSf2- cis(Me)</b><br>Et = -1288.2142868<br>Gsol = -1288.510300 |           |           |           | <b>TSr<sub>cis</sub>(H)</b><br>Et = -1248.9173723<br>Gsol = -1249.210992 |           |           |           |
| 6                                                                 | 0.262117  | 3.134844  | -1.296333 | 6                                                                        | 2.080567  | 2.122251  | -1.608121 |
| 6                                                                 | -0.418564 | 2.081529  | -0.671015 | 6                                                                        | 0.926031  | 2.111003  | -0.829985 |
| 6                                                                 | -1.373010 | 2.398893  | 0.295444  | 6                                                                        | 0.485939  | 3.300610  | -0.254681 |
| 6                                                                 | -1.619389 | 3.719022  | 0.630612  | 6                                                                        | 1.223250  | 4.461349  | -0.424533 |
| 6                                                                 | -0.921267 | 4.759751  | 0.034200  | 6                                                                        | 2.388213  | 4.463074  | -1.175670 |
| 6                                                                 | 0.024837  | 4.443383  | -0.941570 | 6                                                                        | 2.812613  | 3.288319  | -1.772853 |
| 6                                                                 | -0.223680 | 0.732620  | -1.158437 | 6                                                                        | 0.089083  | 0.857963  | -0.735966 |
| 6                                                                 | -0.568566 | -0.538736 | -0.429375 | 6                                                                        | -0.655063 | 0.447866  | 0.562221  |
| 6                                                                 | -2.061599 | -0.824907 | -0.633816 | 6                                                                        | -1.725407 | -0.575404 | 0.085459  |
| 8                                                                 | -2.378301 | -2.010268 | -0.139123 | 8                                                                        | -2.807417 | 0.013446  | -0.395101 |
| 6                                                                 | -3.723625 | -2.534480 | -0.216101 | 6                                                                        | -3.961285 | -0.730882 | -0.837356 |
| 6                                                                 | -4.690039 | -1.630004 | 0.527951  | 6                                                                        | -4.534041 | -1.545400 | 0.309274  |
| 7                                                                 | -0.002808 | -0.618542 | 0.855751  | 8                                                                        | 0.893492  | -0.299551 | -1.174845 |
| 6                                                                 | -0.832123 | -0.224088 | 1.944135  | 6                                                                        | 1.560750  | -1.055324 | -0.373103 |
| 6                                                                 | -0.547592 | -1.049078 | 3.190458  | 7                                                                        | 1.644485  | -2.349025 | -0.655817 |
| 8                                                                 | -2.824463 | -0.081526 | -1.200134 | 6                                                                        | 2.584246  | -3.006660 | 0.234165  |
| 6                                                                 | -3.605278 | -3.874400 | 0.484905  | 6                                                                        | 2.698458  | -1.971171 | 1.361605  |
| 6                                                                 | -4.127257 | -2.726402 | -1.667572 | 7                                                                        | 2.305416  | -0.736242 | 0.680390  |
| 8                                                                 | 1.746153  | 0.613773  | -1.247153 | 6                                                                        | 3.897909  | -3.316511 | -0.456934 |
| 6                                                                 | 2.469368  | -0.178288 | -0.608722 | 6                                                                        | 1.784832  | -2.273857 | 2.533274  |
| 7                                                                 | 2.852835  | -1.386714 | -1.068342 | 6                                                                        | 0.852290  | -3.039073 | -1.635411 |
| 6                                                                 | 3.873401  | -1.964353 | -0.220036 | 6                                                                        | 2.456216  | 0.553541  | 1.333334  |
| 6                                                                 | 3.716231  | -1.130557 | 1.065154  | 7                                                                        | -1.064072 | 1.543702  | 1.289379  |
| 7                                                                 | 3.081218  | 0.074842  | 0.556530  | 6                                                                        | -1.713138 | 1.139915  | 2.485796  |
| 6                                                                 | 2.548547  | -1.868325 | -2.380029 | 6                                                                        | -2.013072 | 2.341549  | 3.361222  |
| 6                                                                 | 2.651773  | 1.141344  | 1.416001  | 8                                                                        | -1.566191 | -1.775252 | 0.151371  |
| 6                                                                 | 2.876071  | -1.827651 | 2.115810  | 6                                                                        | -4.932368 | 0.359517  | -1.248759 |
| 6                                                                 | 5.262271  | -1.862859 | -0.826412 | 6                                                                        | -3.603829 | -1.602020 | -2.029368 |
| 1                                                                 | 5.334342  | -2.407387 | -1.766194 | 1                                                                        | 4.372852  | -2.400669 | -0.805405 |
| 1                                                                 | 5.998611  | -2.285562 | -0.144349 | 1                                                                        | 4.576906  | -3.816543 | 0.231894  |
| 1                                                                 | 5.522445  | -0.821259 | -1.010517 | 1                                                                        | 3.748286  | -3.972244 | -1.312430 |
| 1                                                                 | 3.632589  | -3.009200 | -0.021230 | 1                                                                        | 3.732519  | -1.871481 | 1.687955  |
| 1                                                                 | 4.698582  | -0.874886 | 1.465552  | 1                                                                        | 2.129062  | -3.922464 | 0.609599  |
| 1                                                                 | 3.312196  | -2.796192 | 2.360164  | 1                                                                        | 0.758396  | -2.397474 | 2.190751  |
| 1                                                                 | 2.835946  | -1.243256 | 3.033187  | 1                                                                        | 1.798209  | -1.471066 | 3.267118  |
|                                                                   |           |           |           | 1                                                                        | 2.107664  | -3.189252 | 3.027742  |

|                                                                                        |           |           |           |                                                                             |           |           |           |
|----------------------------------------------------------------------------------------|-----------|-----------|-----------|-----------------------------------------------------------------------------|-----------|-----------|-----------|
| 1                                                                                      | 1.856914  | -1.947979 | 1.746328  | 1                                                                           | 1.485917  | -3.478931 | -2.403571 |
| 1                                                                                      | 1.828730  | 0.824167  | 2.051684  | 1                                                                           | 0.170098  | -2.333949 | -2.091633 |
| 1                                                                                      | 2.305067  | 1.960521  | 0.794711  | 1                                                                           | 0.268008  | -3.817171 | -1.149872 |
| 1                                                                                      | 3.494770  | 1.479068  | 2.016406  | 1                                                                           | 1.499864  | 1.017041  | 1.577382  |
| 1                                                                                      | 2.151579  | -2.881597 | -2.332121 | 1                                                                           | 3.030369  | 1.228269  | 0.707288  |
| 1                                                                                      | 1.800631  | -1.215104 | -2.815811 | 1                                                                           | 3.006644  | 0.376229  | 2.252036  |
| 1                                                                                      | 3.425572  | -1.866643 | -3.029012 | 1                                                                           | 0.003628  | -0.261281 | 1.125874  |
| 1                                                                                      | -3.272631 | -3.737935 | 1.511770  | 1                                                                           | -2.670261 | 0.599231  | 2.322345  |
| 1                                                                                      | -2.884014 | -4.509515 | -0.025707 | 1                                                                           | -1.101877 | 0.419243  | 3.079747  |
| 1                                                                                      | -4.569014 | -4.380486 | 0.494083  | 1                                                                           | -1.088953 | 2.866822  | 3.601747  |
| 1                                                                                      | -3.392338 | -3.342488 | -2.184003 | 1                                                                           | -2.657114 | 3.037762  | 2.825036  |
| 1                                                                                      | -5.088364 | -3.236801 | -1.713996 | 1                                                                           | -2.506815 | 2.059155  | 4.292414  |
| 1                                                                                      | -4.211791 | -1.773392 | -2.179556 | 1                                                                           | -2.912159 | -2.387178 | -1.741698 |
| 1                                                                                      | -5.669687 | -2.104365 | 0.571261  | 1                                                                           | -3.151693 | -0.997739 | -2.815332 |
| 1                                                                                      | -4.788459 | -0.669045 | 0.034092  | 1                                                                           | -4.506285 | -2.058908 | -2.433480 |
| 1                                                                                      | -4.344944 | -1.469992 | 1.548151  | 1                                                                           | -4.508462 | 0.967063  | -2.046051 |
| 1                                                                                      | -0.096705 | -1.317633 | -1.049142 | 1                                                                           | -5.864792 | -0.077820 | -1.601989 |
| 1                                                                                      | -0.704429 | 0.841017  | 2.232867  | 1                                                                           | -5.147504 | 1.010572  | -0.404440 |
| 1                                                                                      | -1.913802 | -0.321175 | 1.740414  | 1                                                                           | -5.476066 | -1.997130 | 0.000171  |
| 1                                                                                      | -1.184383 | -0.743188 | 4.022498  | 1                                                                           | -3.850162 | -2.331242 | 0.612624  |
| 1                                                                                      | -0.717612 | -2.105155 | 2.985911  | 1                                                                           | -4.727817 | -0.900484 | 1.164477  |
| 1                                                                                      | 0.488969  | -0.933794 | 3.503119  | 1                                                                           | -0.407642 | 3.248670  | 0.352836  |
| 1                                                                                      | 1.004945  | 2.901207  | -2.043911 | 1                                                                           | 0.880243  | 5.375297  | 0.039198  |
| 1                                                                                      | -1.968551 | 1.621677  | 0.737211  | 1                                                                           | 2.955530  | 5.374034  | -1.303149 |
| 1                                                                                      | 0.573431  | 5.238046  | -1.428545 | 1                                                                           | 3.708929  | 3.276254  | -2.376718 |
| 1                                                                                      | -2.377153 | 3.941491  | 1.368615  | 1                                                                           | 2.414926  | 1.218014  | -2.095062 |
| 1                                                                                      | -0.096725 | 0.669476  | -2.229617 | 1                                                                           | -0.643483 | 0.907244  | -1.538117 |
| 6                                                                                      | -1.167810 | 6.184539  | 0.422293  | NImag = 1 (-23.1899 cm <sup>-1</sup> )                                      |           |           |           |
| 1                                                                                      | -1.288528 | 6.818713  | -0.455128 |                                                                             |           |           |           |
| 1                                                                                      | -2.061482 | 6.281662  | 1.034313  | NImag = 1 (-332.8234 cm <sup>-1</sup> )                                     |           |           |           |
| 1                                                                                      | -0.329421 | 6.583276  | 0.994938  |                                                                             |           |           |           |
| <b>TSr<sub>trans</sub>(NO<sub>2</sub>)</b><br>Et = -1453.341762<br>Gsol = -1453.690729 |           |           |           | <b>TSr<sub>trans</sub>(CN)</b><br>Et = -1341.1299907<br>Gsol = -1341.452217 |           |           |           |
| 6                                                                                      | -2.038517 | -0.663445 | -1.697876 | 6                                                                           | -2.160851 | -1.003073 | -1.757062 |
| 6                                                                                      | -1.124490 | -0.941257 | -0.688003 | 6                                                                           | -1.248178 | -1.157325 | -0.721038 |
| 6                                                                                      | -1.550891 | -1.616276 | 0.451171  | 6                                                                           | -1.634264 | -1.840690 | 0.426937  |
| 6                                                                                      | -2.861628 | -2.032327 | 0.572321  | 6                                                                           | -2.899246 | -2.382701 | 0.529475  |
| 6                                                                                      | -3.744153 | -1.753485 | -0.455376 | 6                                                                           | -3.803468 | -2.234872 | -0.520071 |
| 6                                                                                      | -3.356475 | -1.064677 | -1.589222 | 6                                                                           | -3.433471 | -1.532792 | -1.663573 |
| 6                                                                                      | 0.290290  | -0.478702 | -0.852815 | 6                                                                           | 0.117803  | -0.561907 | -0.869150 |
| 6                                                                                      | 0.761468  | 0.789727  | -0.090491 | 6                                                                           | 0.464949  | 0.740668  | -0.099252 |
| 6                                                                                      | -0.369391 | 1.335093  | 0.813244  | 6                                                                           | -0.718377 | 1.178285  | 0.794743  |
| 8                                                                                      | -1.198018 | 2.129177  | 0.160474  | 8                                                                           | -1.614926 | 1.885576  | 0.132024  |

|   |           |           |           |   |           |           |           |
|---|-----------|-----------|-----------|---|-----------|-----------|-----------|
| 6 | -2.283717 | 2.814968  | 0.822451  | 6 | -2.766917 | 2.466121  | 0.782031  |
| 6 | -3.277822 | 1.818296  | 1.391078  | 6 | -3.657746 | 1.382770  | 1.363428  |
| 8 | 1.120838  | -1.635377 | -0.468274 | 8 | 1.050260  | -1.639426 | -0.480082 |
| 6 | 2.378516  | -1.436951 | -0.219195 | 6 | 2.279910  | -1.325605 | -0.212609 |
| 7 | 2.917787  | -1.871600 | 0.921394  | 7 | 2.842836  | -1.713736 | 0.933968  |
| 6 | 4.278221  | -1.354000 | 1.023010  | 6 | 4.145498  | -1.068521 | 1.056636  |
| 6 | 4.567442  | -0.859249 | -0.408911 | 6 | 4.408916  | -0.549118 | -0.371177 |
| 7 | 3.254039  | -0.915572 | -1.038577 | 7 | 3.114058  | -0.720429 | -1.017883 |
| 6 | 2.109418  | -2.106853 | 2.094792  | 6 | 2.042940  | -2.026417 | 2.094863  |
| 6 | 2.998616  | -0.491266 | -2.400605 | 6 | 2.838899  | -0.316898 | -2.382368 |
| 6 | 5.178652  | 0.523222  | -0.452881 | 6 | 4.899088  | 0.881028  | -0.406191 |
| 6 | 5.272562  | -2.377060 | 1.521644  | 6 | 5.224885  | -1.991861 | 1.572902  |
| 7 | 1.330032  | 1.632467  | -1.033146 | 7 | 0.960596  | 1.636643  | -1.034514 |
| 6 | 1.885566  | 2.789941  | -0.425509 | 6 | 1.403641  | 2.836598  | -0.417370 |
| 6 | 2.551731  | 3.673736  | -1.462788 | 6 | 1.999737  | 3.780674  | -1.444125 |
| 8 | -0.453729 | 1.050572  | 1.984793  | 8 | -0.782871 | 0.893720  | 1.967697  |
| 6 | -1.739849 | 3.745901  | 1.891954  | 6 | -2.322487 | 3.462527  | 1.838393  |
| 6 | -2.915676 | 3.611807  | -0.303064 | 6 | -3.472703 | 3.178852  | -0.355907 |
| 7 | -5.122534 | -2.197823 | -0.338345 | 6 | -5.110499 | -2.803874 | -0.422001 |
| 1 | -3.210565 | -2.559455 | 1.444408  | 1 | -3.196687 | -2.915389 | 1.419326  |
| 1 | -0.855840 | -1.806182 | 1.252213  | 1 | -0.944985 | -1.935626 | 1.249944  |
| 1 | -1.713897 | -0.123540 | -2.574752 | 1 | -1.871236 | -0.457885 | -2.643133 |
| 1 | -4.076836 | -0.863643 | -2.364476 | 1 | -4.137831 | -1.415368 | -2.472411 |
| 1 | 2.475147  | 0.476512  | -2.344438 | 1 | 2.228717  | 0.598797  | -2.331109 |
| 1 | 3.953407  | -0.413656 | -2.911836 | 1 | 3.789230  | -0.151584 | -2.881006 |
| 1 | 2.397969  | -1.243215 | -2.907230 | 1 | 2.315257  | -1.118605 | -2.898083 |
| 1 | 2.727861  | -2.578007 | 2.851568  | 1 | 2.687391  | -2.457279 | 2.854035  |
| 1 | 1.690922  | -1.177118 | 2.484148  | 1 | 1.547617  | -1.137342 | 2.489287  |
| 1 | 1.302864  | -2.787047 | 1.844595  | 1 | 1.295249  | -2.764056 | 1.825618  |
| 1 | 4.258580  | -0.493527 | 1.698525  | 1 | 4.032801  | -0.213641 | 1.730254  |
| 1 | 5.215593  | -1.574078 | -0.923074 | 1 | 5.124025  | -1.204205 | -0.876253 |
| 1 | 2.640034  | 2.546766  | 0.363423  | 1 | 2.168212  | 2.658671  | 0.379437  |
| 1 | 1.143557  | 3.411151  | 0.113738  | 1 | 0.603357  | 3.387274  | 0.115505  |
| 1 | 2.970589  | 4.579366  | -1.022083 | 1 | 2.329758  | 4.718808  | -0.995963 |
| 1 | 3.355313  | 3.135328  | -1.967504 | 1 | 2.854586  | 3.318396  | -1.939912 |
| 1 | 1.824605  | 3.959964  | -2.221218 | 1 | 1.259046  | 4.002889  | -2.210840 |
| 1 | 1.456997  | 0.418804  | 0.722045  | 1 | 1.186573  | 0.434885  | 0.717496  |
| 1 | 0.481357  | -0.262204 | -1.896535 | 1 | 0.298228  | -0.325316 | -1.910401 |
| 1 | 5.415688  | 0.823385  | -1.470830 | 1 | 5.122973  | 1.202745  | -1.420522 |
| 1 | 4.492573  | 1.255279  | -0.032174 | 1 | 4.147985  | 1.551071  | 0.006792  |
| 1 | 6.106025  | 0.531883  | 0.118808  | 1 | 5.814721  | 0.967474  | 0.177782  |
| 1 | 5.052174  | -2.688060 | 2.540695  | 1 | 5.020296  | -2.319786 | 2.589926  |
| 1 | 5.270595  | -3.258364 | 0.883147  | 1 | 5.314974  | -2.870918 | 0.937705  |
| 1 | 6.274421  | -1.950310 | 1.521542  | 1 | 6.182049  | -1.472724 | 1.585243  |
| 1 | -3.758110 | 4.190938  | 0.071291  | 1 | -4.366936 | 3.680680  | 0.009784  |
| 1 | -2.188334 | 4.292485  | -0.740444 | 1 | -2.813869 | 3.918558  | -0.805667 |

|                                        |           |           |           |                                       |           |           |           |
|----------------------------------------|-----------|-----------|-----------|---------------------------------------|-----------|-----------|-----------|
| 1                                      | -3.273121 | 2.945701  | -1.086034 | 1                                     | -3.763731 | 2.467548  | -1.126434 |
| 1                                      | -2.552204 | 4.349438  | 2.295170  | 1                                     | -3.192967 | 3.981644  | 2.237846  |
| 1                                      | -1.284103 | 3.186643  | 2.702509  | 1                                     | -1.808032 | 2.965099  | 2.654142  |
| 1                                      | -0.996423 | 4.416365  | 1.463994  | 1                                     | -1.655148 | 4.202774  | 1.400028  |
| 1                                      | -4.147851 | 2.351131  | 1.772957  | 1                                     | -4.581801 | 1.829805  | 1.728197  |
| 1                                      | -3.613730 | 1.136005  | 0.611991  | 1                                     | -3.913966 | 0.653838  | 0.596501  |
| 1                                      | -2.836662 | 1.242927  | 2.198038  | 1                                     | -3.166999 | 0.871345  | 2.184659  |
| 8                                      | -5.877509 | -1.927521 | -1.243115 | 7                                     | -6.162765 | -3.265727 | -0.344423 |
| 8                                      | -5.430719 | -2.812705 | 0.655992  |                                       |           |           |           |
| NImag = 1 (-22.5434 cm <sup>-1</sup> ) |           |           |           | NImag = 1 (-21.7134cm <sup>-1</sup> ) |           |           |           |
| <b>TSr<sub>trans</sub>(COOMe)</b>      |           |           |           | <b>TSr<sub>trans</sub>(Cl)</b>        |           |           |           |
| Et = -1476.7277996                     |           |           |           | Et = -1708.5301982                    |           |           |           |
| Gsol = -1477.085425                    |           |           |           | Gsol = -1708.853769                   |           |           |           |
| 7                                      | 3.405675  | -1.146184 | -1.072240 | 7                                     | 3.165421  | -0.800491 | -1.009393 |
| 6                                      | 2.511499  | -1.569527 | -0.216027 | 6                                     | 2.314158  | -1.366141 | -0.191841 |
| 7                                      | 3.045452  | -2.015759 | 0.923590  | 7                                     | 2.866684  | -1.744954 | 0.963485  |
| 6                                      | 4.443609  | -1.603605 | 0.977067  | 6                                     | 4.184281  | -1.129208 | 1.073964  |
| 6                                      | 4.735079  | -1.180952 | -0.477054 | 6                                     | 4.462847  | -0.647463 | -0.364277 |
| 8                                      | 1.237580  | -1.670681 | -0.429189 | 8                                     | 1.077063  | -1.649487 | -0.451679 |
| 6                                      | 0.489637  | -0.455349 | -0.817397 | 6                                     | 0.181859  | -0.548080 | -0.871425 |
| 6                                      | 1.097800  | 0.783629  | -0.106295 | 6                                     | 0.581490  | 0.761239  | -0.138989 |
| 7                                      | 1.700676  | 1.554662  | -1.089853 | 7                                     | 1.053154  | 1.632004  | -1.110069 |
| 6                                      | 2.371213  | 2.674957  | -0.532188 | 6                                     | 1.529801  | 2.841070  | -0.537951 |
| 6                                      | 3.083583  | 3.465892  | -1.613081 | 6                                     | 2.108611  | 3.748918  | -1.606534 |
| 6                                      | 2.251960  | -2.147828 | 2.123013  | 6                                     | 2.052234  | -1.996010 | 2.130282  |
| 6                                      | 5.367596  | -2.684053 | 1.489884  | 6                                     | 5.239734  | -2.067404 | 1.612512  |
| 6                                      | 5.458876  | 0.142789  | -0.581475 | 6                                     | 4.987783  | 0.769335  | -0.428903 |
| 6                                      | 3.147533  | -0.741356 | -2.439464 | 6                                     | 2.902850  | -0.421063 | -2.383740 |
| 6                                      | -0.951651 | -0.796482 | -0.596388 | 6                                     | -1.206089 | -1.085731 | -0.715462 |
| 6                                      | -1.873075 | -0.466600 | -1.582800 | 6                                     | -2.120234 | -0.883289 | -1.740340 |
| 6                                      | -3.215161 | -0.757331 | -1.421082 | 6                                     | -3.419268 | -1.351206 | -1.641367 |
| 6                                      | -3.649461 | -1.394309 | -0.265012 | 6                                     | -3.800602 | -2.039019 | -0.503222 |
| 6                                      | -2.733729 | -1.716351 | 0.729733  | 6                                     | -2.909441 | -2.245184 | 0.536149  |
| 6                                      | -1.396738 | -1.413726 | 0.567864  | 6                                     | -1.618946 | -1.760482 | 0.426755  |
| 6                                      | -5.067920 | -1.749460 | -0.041320 | 17                                    | -5.416680 | -2.648829 | -0.374403 |
| 6                                      | 0.056488  | 1.449382  | 0.821608  | 6                                     | -0.558062 | 1.227461  | 0.794946  |
| 8                                      | 0.013234  | 1.230398  | 2.009154  | 8                                     | -0.589817 | 0.941911  | 1.969588  |
| 8                                      | -0.746115 | 2.271716  | 0.169510  | 8                                     | -1.457675 | 1.960648  | 0.165952  |
| 6                                      | -1.757635 | 3.048863  | 0.845417  | 6                                     | -2.573967 | 2.563913  | 0.854462  |
| 6                                      | -2.399282 | 3.825363  | -0.289024 | 6                                     | -3.299818 | 3.296769  | -0.257932 |
| 6                                      | -2.776959 | 2.140015  | 1.508995  | 6                                     | -3.470877 | 1.499244  | 1.460525  |
| 6                                      | -1.110407 | 3.996866  | 1.839687  | 6                                     | -2.073178 | 3.546092  | 1.899120  |
| 1                                      | -3.091776 | -2.200237 | 1.625263  | 1                                     | -3.227327 | -2.772300 | 1.421862  |
| 1                                      | -0.694677 | -1.648497 | 1.351421  | 1                                     | -0.931011 | -1.900597 | 1.244887  |

|                                                                                                                                                           |           |           |           |                                                                                                                                                            |           |           |           |
|-----------------------------------------------------------------------------------------------------------------------------------------------------------|-----------|-----------|-----------|------------------------------------------------------------------------------------------------------------------------------------------------------------|-----------|-----------|-----------|
| 1                                                                                                                                                         | -1.533234 | 0.027597  | -2.481209 | 1                                                                                                                                                          | -1.815339 | -0.344532 | -2.625635 |
| 1                                                                                                                                                         | -3.925710 | -0.502824 | -2.191233 | 1                                                                                                                                                          | -4.125679 | -1.193842 | -2.441170 |
| 1                                                                                                                                                         | 2.708278  | 0.267942  | -2.400713 | 1                                                                                                                                                          | 2.317991  | 0.512032  | -2.358639 |
| 1                                                                                                                                                         | 4.090455  | -0.759523 | -2.977928 | 1                                                                                                                                                          | 3.858342  | -0.294490 | -2.884137 |
| 1                                                                                                                                                         | 2.471215  | -1.454166 | -2.905675 | 1                                                                                                                                                          | 2.358081  | -1.220112 | -2.881362 |
| 1                                                                                                                                                         | 2.846948  | -2.652483 | 2.877115  | 1                                                                                                                                                          | 2.686759  | -2.394386 | 2.915133  |
| 1                                                                                                                                                         | 1.927048  | -1.174916 | 2.495917  | 1                                                                                                                                                          | 1.559551  | -1.085399 | 2.475789  |
| 1                                                                                                                                                         | 1.381937  | -2.759315 | 1.911478  | 1                                                                                                                                                          | 1.301506  | -2.740503 | 1.889503  |
| 1                                                                                                                                                         | 4.508035  | -0.721765 | 1.621778  | 1                                                                                                                                                          | 4.092020  | -0.257098 | 1.728420  |
| 1                                                                                                                                                         | 5.308352  | -1.963454 | -0.982002 | 1                                                                                                                                                          | 5.163073  | -1.330371 | -0.853367 |
| 1                                                                                                                                                         | 3.123800  | 2.389650  | 0.245059  | 1                                                                                                                                                          | 2.316037  | 2.673101  | 0.239932  |
| 1                                                                                                                                                         | 1.702504  | 3.375418  | 0.006706  | 1                                                                                                                                                          | 0.753699  | 3.417201  | 0.003555  |
| 1                                                                                                                                                         | 3.592313  | 4.343674  | -1.212125 | 1                                                                                                                                                          | 2.464779  | 4.693773  | -1.193604 |
| 1                                                                                                                                                         | 3.822167  | 2.842855  | -2.119711 | 1                                                                                                                                                          | 2.941852  | 3.260788  | -2.114150 |
| 1                                                                                                                                                         | 2.363779  | 3.792542  | -2.362205 | 1                                                                                                                                                          | 1.348879  | 3.961572  | -2.357257 |
| 1                                                                                                                                                         | 1.792303  | 0.376254  | 0.689657  | 1                                                                                                                                                          | 1.332740  | 0.462003  | 0.654064  |
| 1                                                                                                                                                         | 0.663632  | -0.282745 | -1.872364 | 1                                                                                                                                                          | 0.374652  | -0.346634 | -1.917730 |
| 1                                                                                                                                                         | 5.690381  | 0.391089  | -1.614589 | 1                                                                                                                                                          | 5.218527  | 1.064431  | -1.449811 |
| 1                                                                                                                                                         | 4.849211  | 0.942744  | -0.166684 | 1                                                                                                                                                          | 4.253139  | 1.465734  | -0.029927 |
| 1                                                                                                                                                         | 6.400064  | 0.090054  | -0.035159 | 1                                                                                                                                                          | 5.905497  | 0.846021  | 0.153234  |
| 1                                                                                                                                                         | 5.149061  | -2.941469 | 2.524182  | 1                                                                                                                                                          | 5.023212  | -2.370346 | 2.634858  |
| 1                                                                                                                                                         | 5.280477  | -3.583825 | 0.883914  | 1                                                                                                                                                          | 5.310428  | -2.960873 | 0.995201  |
| 1                                                                                                                                                         | 6.399504  | -2.338155 | 1.451920  | 1                                                                                                                                                          | 6.209243  | -1.571483 | 1.618508  |
| 1                                                                                                                                                         | -3.187857 | 4.471577  | 0.093187  | 1                                                                                                                                                          | -4.171030 | 3.816252  | 0.137761  |
| 1                                                                                                                                                         | -1.657208 | 4.439014  | -0.795475 | 1                                                                                                                                                          | -2.639662 | 4.023948  | -0.725912 |
| 1                                                                                                                                                         | -2.831733 | 3.142104  | -1.017498 | 1                                                                                                                                                          | -3.629861 | 2.594604  | -1.021018 |
| 1                                                                                                                                                         | -1.867408 | 4.660878  | 2.255789  | 1                                                                                                                                                          | -2.918190 | 4.082916  | 2.328884  |
| 1                                                                                                                                                         | -0.640594 | 3.449661  | 2.650451  | 1                                                                                                                                                          | -1.543484 | 3.033399  | 2.695477  |
| 1                                                                                                                                                         | -0.357345 | 4.606089  | 1.342455  | 1                                                                                                                                                          | -1.403902 | 4.272997  | 1.441655  |
| 1                                                                                                                                                         | -3.600707 | 2.739821  | 1.894951  | 1                                                                                                                                                          | -4.371937 | 1.967016  | 1.856023  |
| 1                                                                                                                                                         | -3.179449 | 1.433608  | 0.785118  | 1                                                                                                                                                          | -3.767125 | 0.778739  | 0.700263  |
| 1                                                                                                                                                         | -2.331772 | 1.586078  | 2.328528  | 1                                                                                                                                                          | -2.966272 | 0.973474  | 2.264116  |
| 8                                                                                                                                                         | -5.856964 | -1.371204 | -1.046269 | NImag = 1 (-19.1262 cm <sup>-1</sup> )                                                                                                                     |           |           |           |
| 8                                                                                                                                                         | -5.479517 | -2.318233 | 0.935056  |                                                                                                                                                            |           |           |           |
| 6                                                                                                                                                         | -7.227019 | -1.683983 | -0.885960 | NImag = 1 (-21.3350 cm <sup>-1</sup> )                                                                                                                     |           |           |           |
| 1                                                                                                                                                         | -7.721069 | -1.314385 | -1.776807 |                                                                                                                                                            |           |           |           |
| 1                                                                                                                                                         | -7.365844 | -2.757369 | -0.791950 | NImag = 1 (-21.3350 cm <sup>-1</sup> )                                                                                                                     |           |           |           |
| 1                                                                                                                                                         | -7.628478 | -1.199586 | -0.000327 |                                                                                                                                                            |           |           |           |
| <p style="text-align: center;"><b>TSr<sub>trans</sub>(H)</b><br/>                     Et = -1248.9250258<br/>                     Gsol = -1249.224276</p> |           |           |           | <p style="text-align: center;"><b>TSr<sub>trans</sub>(Me)</b><br/>                     Et = -1288.2354846<br/>                     Gsol = -1288.539493</p> |           |           |           |
| 7                                                                                                                                                         | 2.836672  | -1.324460 | 0.925218  | 7                                                                                                                                                          | 3.053737  | -0.575994 | -1.003156 |
| 6                                                                                                                                                         | 2.233967  | -1.040705 | -0.233127 |                                                                                                                                                            |           |           |           |

|   |           |           |           |   |           |           |           |
|---|-----------|-----------|-----------|---|-----------|-----------|-----------|
| 7 | 2.935957  | -0.240950 | -0.995665 | 6 | 2.254845  | -1.231609 | -0.198734 |
| 6 | 4.137428  | 0.198167  | -0.299033 | 7 | 2.829798  | -1.555657 | 0.963099  |
| 6 | 3.940144  | -0.388901 | 1.112425  | 6 | 4.069005  | -0.798225 | 1.094700  |
| 8 | 1.115031  | -1.609631 | -0.549795 | 6 | 4.318626  | -0.291108 | -0.339808 |
| 6 | -0.018126 | -0.740276 | -0.945001 | 8 | 1.059368  | -1.641391 | -0.476876 |
| 6 | 0.032518  | 0.582900  | -0.134006 | 6 | 0.059386  | -0.631751 | -0.899389 |
| 7 | 0.301270  | 1.597575  | -1.040924 | 6 | 0.321055  | 0.704162  | -0.151932 |
| 6 | 0.454289  | 2.850410  | -0.391285 | 7 | 0.694710  | 1.632648  | -1.112065 |
| 6 | 0.819580  | 3.931839  | -1.390528 | 6 | 1.033486  | 2.880829  | -0.526956 |
| 6 | 2.620314  | 0.124205  | -2.362208 | 6 | 1.527535  | 3.851506  | -1.583055 |
| 6 | 4.303917  | 1.701207  | -0.304288 | 6 | 2.026374  | -1.889792 | 2.117264  |
| 6 | 5.184340  | -1.032447 | 1.678890  | 6 | 5.211783  | -1.612360 | 1.656180  |
| 6 | 2.081218  | -1.828444 | 2.049283  | 6 | 4.696974  | 1.172082  | -0.398663 |
| 6 | -1.235312 | -1.608626 | -0.869343 | 6 | 2.771373  | -0.220313 | -2.379720 |
| 6 | -1.482362 | -2.457237 | 0.203007  | 6 | -1.268819 | -1.308215 | -0.770237 |
| 6 | -2.624966 | -3.238090 | 0.229094  | 6 | -2.200296 | -1.149624 | -1.786686 |
| 6 | -3.541778 | -3.168925 | -0.808538 | 6 | -3.446804 | -1.746532 | -1.703784 |
| 6 | -3.311653 | -2.310182 | -1.871208 | 6 | -3.793904 | -2.530442 | -0.610228 |
| 6 | -2.161651 | -1.538802 | -1.901991 | 6 | -2.859133 | -2.676669 | 0.409838  |
| 6 | -1.204722 | 0.702908  | 0.783717  | 6 | -1.618251 | -2.071015 | 0.337149  |
| 8 | -1.190631 | 0.343742  | 1.938325  | 6 | -5.124832 | -3.215932 | -0.538930 |
| 8 | -2.241833 | 1.240920  | 0.168584  | 6 | -0.857062 | 1.032415  | 0.792042  |
| 6 | -3.484919 | 1.502815  | 0.852877  | 8 | -0.853147 | 0.728267  | 1.962548  |
| 6 | -3.261000 | 2.492617  | 1.983040  | 8 | -1.833262 | 1.676649  | 0.178820  |
| 6 | -4.343700 | 2.123098  | -0.233145 | 6 | -3.010931 | 2.127956  | 0.878980  |
| 6 | -4.107280 | 0.208803  | 1.346607  | 6 | -3.818781 | 2.796730  | -0.217474 |
| 1 | -4.432768 | -3.779498 | -0.786585 | 6 | -3.775667 | 0.949917  | 1.455919  |
| 1 | -2.803773 | -3.897472 | 1.065910  | 6 | -2.629326 | 3.136681  | 1.948300  |
| 1 | -0.783189 | -2.499333 | 1.022878  | 1 | -3.110623 | -3.268371 | 1.279542  |
| 1 | -1.981613 | -0.866651 | -2.728682 | 1 | -0.920144 | -2.183914 | 1.151407  |
| 1 | -4.022630 | -2.246560 | -2.682029 | 1 | -1.949998 | -0.541359 | -2.644179 |
| 1 | 1.826450  | 0.885403  | -2.321476 | 1 | -4.157273 | -1.607355 | -2.507126 |
| 1 | 3.527318  | 0.500038  | -2.826635 | 1 | 2.098403  | 0.650314  | -2.363096 |
| 1 | 2.296234  | -0.759876 | -2.906326 | 1 | 3.715832  | -0.000439 | -2.868922 |
| 1 | 2.774765  | -2.084360 | 2.843565  | 1 | 2.312322  | -1.067186 | -2.884504 |
| 1 | 1.358908  | -1.092386 | 2.406919  | 1 | 2.687365  | -2.207354 | 2.917065  |
| 1 | 1.556065  | -2.729496 | 1.752535  | 1 | 1.425502  | -1.039307 | 2.444428  |
| 1 | 3.593449  | 0.406183  | 1.779965  | 1 | 1.370067  | -2.716575 | 1.869303  |
| 1 | 4.997483  | -0.276863 | -0.779949 | 1 | 3.869526  | 0.060134  | 1.743655  |
| 1 | 1.239179  | 2.833725  | 0.406436  | 1 | 5.092986  | -0.898616 | -0.816841 |
| 1 | -0.451229 | 3.189647  | 0.149640  | 1 | 1.823923  | 2.792163  | 0.260363  |
| 1 | 0.925842  | 4.909332  | -0.917750 | 1 | 0.194558  | 3.368676  | 0.007586  |
| 1 | 1.757817  | 3.689490  | -1.891825 | 1 | 1.776884  | 4.826158  | -1.160885 |
| 1 | 0.048415  | 3.997841  | -2.156734 | 1 | 2.413977  | 3.456111  | -2.081164 |
| 1 | 0.815274  | 0.429625  | 0.670436  | 1 | 0.759764  | 3.987757  | -2.343416 |
| 1 | 0.144114  | -0.437279 | -1.971881 | 1 | 1.103890  | 0.479801  | 0.635986  |



|                                        |           |           |           |                                        |           |           |           |
|----------------------------------------|-----------|-----------|-----------|----------------------------------------|-----------|-----------|-----------|
| 1                                      | 4.490216  | 2.079259  | -1.306817 | 1                                      | 0.245658  | -0.401705 | -1.940923 |
| 1                                      | 3.408670  | 2.184091  | 0.081816  | 1                                      | 4.918458  | 1.487797  | -1.415517 |
| 1                                      | 5.155453  | 1.977741  | 0.316579  | 1                                      | 3.885748  | 1.789437  | -0.018483 |
| 1                                      | 5.016478  | -1.415279 | 2.683373  | 1                                      | 5.588978  | 1.344033  | 0.202808  |
| 1                                      | 5.513711  | -1.854566 | 1.046370  | 1                                      | 5.010797  | -1.935090 | 2.675660  |
| 1                                      | 5.986449  | -0.298437 | 1.740324  | 1                                      | 5.392612  | -2.494160 | 1.044480  |
| 1                                      | -5.324912 | 2.381159  | 0.162184  | 1                                      | 6.120268  | -1.012222 | 1.677901  |
| 1                                      | -3.872984 | 3.024414  | -0.620195 | 1                                      | -4.746238 | 3.198767  | 0.187386  |
| 1                                      | -4.472312 | 1.424641  | -1.057689 | 1                                      | -3.249985 | 3.608983  | -0.665126 |
| 1                                      | -4.220603 | 2.778516  | 2.412673  | 1                                      | -4.060814 | 2.078894  | -0.998705 |
| 1                                      | -2.642263 | 2.060483  | 2.762753  | 1                                      | -3.531486 | 3.559782  | 2.389123  |
| 1                                      | -2.774780 | 3.390525  | 1.604904  | 1                                      | -2.042120 | 2.670307  | 2.732681  |
| 1                                      | -5.101931 | 0.413381  | 1.742191  | 1                                      | -2.050198 | 3.948033  | 1.510217  |
| 1                                      | -4.203246 | -0.500449 | 0.526550  | 1                                      | -4.730530 | 1.296207  | 1.850929  |
| 1                                      | -3.503352 | -0.240389 | 2.127833  | 1                                      | -3.971742 | 0.213047  | 0.679121  |
| NImag = 1 (-18.2252 cm <sup>-1</sup> ) |           |           |           | 1                                      | -3.215924 | 0.474137  | 2.254088  |
|                                        |           |           |           | 1                                      | -5.867331 | -2.706758 | -1.149966 |
|                                        |           |           |           | 1                                      | -5.056023 | -4.244076 | -0.897483 |
|                                        |           |           |           | 1                                      | -5.498303 | -3.253372 | 0.482874  |
|                                        |           |           |           | NImag = 1 (-18.6661 cm <sup>-1</sup> ) |           |           |           |
| <b>TSr<sub>trans</sub>(OMe)</b>        |           |           |           | <b>TSr<sub>trans</sub>(OH)</b>         |           |           |           |
| Et = -1363.4107779                     |           |           |           | Et = -1324.1150318                     |           |           |           |
| Gsol = -1363.737124                    |           |           |           | Gsol = -1324.449044                    |           |           |           |
| 7                                      | 3.165563  | -0.842455 | -1.023465 | 7                                      | 3.053393  | -0.556137 | -0.995042 |
| 6                                      | 2.343316  | -1.365474 | -0.147053 | 6                                      | 2.259720  | -1.211677 | -0.184391 |
| 7                                      | 2.931870  | -1.661556 | 1.014058  | 7                                      | 2.833773  | -1.513395 | 0.983003  |
| 6                                      | 4.245451  | -1.029660 | 1.047456  | 6                                      | 4.066194  | -0.743930 | 1.108287  |
| 6                                      | 4.474804  | -0.625197 | -0.423684 | 6                                      | 4.311720  | -0.245778 | -0.330487 |
| 8                                      | 1.104893  | -1.678735 | -0.350704 | 8                                      | 1.069804  | -1.638957 | -0.459325 |
| 6                                      | 0.191118  | -0.614749 | -0.828965 | 6                                      | 0.062933  | -0.645513 | -0.903449 |
| 6                                      | 0.596828  | 0.745291  | -0.198483 | 6                                      | 0.306313  | 0.704598  | -0.176099 |
| 7                                      | 0.954131  | 1.575349  | -1.250347 | 7                                      | 0.635046  | 1.628616  | -1.156264 |
| 6                                      | 1.418562  | 2.836215  | -0.791271 | 6                                      | 0.954568  | 2.894250  | -0.597803 |
| 6                                      | 1.883415  | 3.691079  | -1.955211 | 6                                      | 1.411379  | 3.856305  | -1.678307 |
| 6                                      | 2.146451  | -1.836850 | 2.216061  | 6                                      | 2.027929  | -1.841385 | 2.138279  |
| 6                                      | 5.325841  | -1.928863 | 1.603248  | 6                                      | 5.215882  | -1.543940 | 1.675975  |
| 6                                      | 4.964819  | 0.797188  | -0.581711 | 6                                      | 4.667384  | 1.222665  | -0.401410 |
| 6                                      | 2.861102  | -0.548859 | -2.410495 | 6                                      | 2.770756  | -0.218539 | -2.376317 |
| 6                                      | -1.191225 | -1.145627 | -0.622332 | 6                                      | -1.259930 | -1.330907 | -0.778328 |
| 6                                      | -2.146596 | -0.908058 | -1.596108 | 6                                      | -2.194943 | -1.163599 | -1.789099 |
| 6                                      | -3.450855 | -1.360496 | -1.458323 | 6                                      | -3.439075 | -1.766635 | -1.719706 |
| 6                                      | -3.808506 | -2.079751 | -0.325858 | 6                                      | -3.758973 | -2.564361 | -0.630311 |
| 6                                      | -2.858116 | -2.318514 | 0.663372  | 6                                      | -2.835512 | -2.734552 | 0.393118  |
| 6                                      | -1.571365 | -1.848232 | 0.518321  |                                        |           |           |           |

|   |           |           |           |   |           |           |           |
|---|-----------|-----------|-----------|---|-----------|-----------|-----------|
| 8 | -5.037828 | -2.583821 | -0.096740 | 6 | -1.604772 | -2.114201 | 0.318381  |
| 6 | -0.482919 | 1.208900  | 0.803949  | 8 | -4.946014 | -3.197783 | -0.513225 |
| 8 | -0.427762 | 0.941539  | 1.982731  | 6 | -0.860791 | 1.006504  | 0.789971  |
| 8 | -1.437247 | 1.919290  | 0.232185  | 8 | -0.833583 | 0.686033  | 1.956247  |
| 6 | -2.517465 | 2.502257  | 0.989852  | 8 | -1.855741 | 1.646208  | 0.203239  |
| 6 | -3.333185 | 3.209625  | -0.076149 | 6 | -3.023122 | 2.079115  | 0.931908  |
| 6 | -3.347032 | 1.421740  | 1.660202  | 6 | -3.857865 | 2.753638  | -0.140715 |
| 6 | -1.972014 | 3.503805  | 1.993046  | 6 | -3.766668 | 0.888618  | 1.510505  |
| 1 | -3.157467 | -2.870163 | 1.541359  | 6 | -2.629051 | 3.079191  | 2.004850  |
| 1 | -0.851806 | -2.027644 | 1.301172  | 1 | -3.102958 | -3.348850 | 1.239037  |
| 1 | -1.873025 | -0.346061 | -2.477629 | 1 | -0.901837 | -2.239920 | 1.126377  |
| 1 | -4.165625 | -1.156412 | -2.239360 | 1 | -1.951253 | -0.542130 | -2.638718 |
| 1 | 2.261892  | 0.374348  | -2.433097 | 1 | -4.154564 | -1.625336 | -2.519377 |
| 1 | 3.801863  | -0.438819 | -2.942120 | 1 | 2.083526  | 0.640808  | -2.374492 |
| 1 | 2.317672  | -1.384376 | -2.845685 | 1 | 3.713609  | 0.012530  | -2.863449 |
| 1 | 2.817496  | -2.096397 | 3.028224  | 1 | 2.328960  | -1.078093 | -2.875089 |
| 1 | 1.592516  | -0.930140 | 2.464691  | 1 | 2.691502  | -2.095599 | 2.958230  |
| 1 | 1.449637  | -2.656191 | 2.076040  | 1 | 1.383696  | -1.007993 | 2.423784  |
| 1 | 4.166348  | -0.123649 | 1.655711  | 1 | 1.415365  | -2.708261 | 1.915553  |
| 1 | 5.179009  | -1.318492 | -0.892100 | 1 | 3.859400  | 0.117596  | 1.750530  |
| 1 | 2.265246  | 2.749057  | -0.065209 | 1 | 5.097113  | -0.844959 | -0.799859 |
| 1 | 0.660083  | 3.418619  | -0.232170 | 1 | 1.759064  | 2.836247  | 0.177762  |
| 1 | 2.229667  | 4.673635  | -1.630919 | 1 | 0.113552  | 3.373090  | -0.058802 |
| 1 | 2.697382  | 3.199334  | -2.489700 | 1 | 1.645491  | 4.843611  | -1.277291 |
| 1 | 1.064591  | 3.826087  | -2.660572 | 1 | 2.298720  | 3.471048  | -2.182606 |
| 1 | 1.421567  | 0.520222  | 0.545406  | 1 | 0.629617  | 3.962284  | -2.429220 |
| 1 | 0.368984  | -0.482071 | -1.888677 | 1 | 1.110840  | 0.512085  | 0.598427  |
| 1 | 5.157739  | 1.040968  | -1.623887 | 1 | 0.255624  | -0.427088 | -1.946293 |
| 1 | 4.226565  | 1.498683  | -0.198381 | 1 | 4.885188  | 1.533293  | -1.420646 |
| 1 | 5.897480  | 0.926094  | -0.033456 | 1 | 3.846431  | 1.830888  | -0.027333 |
| 1 | 5.138475  | -2.182804 | 2.644622  | 1 | 5.555829  | 1.413645  | 0.199600  |
| 1 | 5.389911  | -2.851587 | 1.029792  | 1 | 5.016097  | -1.863092 | 2.696838  |
| 1 | 6.289827  | -1.424078 | 1.558918  | 1 | 5.405870  | -2.427505 | 1.069616  |
| 1 | -4.189780 | 3.709961  | 0.372924  | 1 | 6.118661  | -0.935155 | 1.695718  |
| 1 | -2.724232 | 3.949994  | -0.590670 | 1 | -4.781376 | 3.141418  | 0.286444  |
| 1 | -3.693135 | 2.493648  | -0.812443 | 1 | -3.305530 | 3.576828  | -0.588994 |
| 1 | -2.798935 | 4.025610  | 2.473771  | 1 | -4.107665 | 2.043166  | -0.926303 |
| 1 | -1.380082 | 3.008444  | 2.755823  | 1 | -3.525903 | 3.490847  | 2.466749  |
| 1 | -1.349873 | 4.241264  | 1.488287  | 1 | -2.024419 | 2.608933  | 2.773502  |
| 1 | -4.231348 | 1.871171  | 2.111502  | 1 | -2.063876 | 3.899390  | 1.565023  |
| 1 | -3.671786 | 0.687531  | 0.925290  | 1 | -4.716053 | 1.222052  | 1.928833  |
| 1 | -2.778118 | 0.913727  | 2.431467  | 1 | -3.973173 | 0.159081  | 0.729619  |
| 6 | -6.034557 | -2.346183 | -1.048147 | 1 | -3.187488 | 0.407474  | 2.291255  |
| 1 | -6.934139 | -2.818995 | -0.668893 | 1 | -5.493733 | -2.989133 | -1.270893 |
| 1 | -6.218752 | -1.278571 | -1.177520 |   |           |           |           |
| 1 | -5.780479 | -2.784996 | -2.014314 |   |           |           |           |

| NImag = 1 (-22.0013 cm <sup>-1</sup> )   |           |           |           | NImag = 1 (-17.6374 cm <sup>-1</sup> ) |           |           |           |
|------------------------------------------|-----------|-----------|-----------|----------------------------------------|-----------|-----------|-----------|
| <b>TSr<sub>cis</sub>(NO<sub>2</sub>)</b> |           |           |           | <b>TSr<sub>cis</sub>(CN)</b>           |           |           |           |
| Et = -1453.336615                        |           |           |           | Et = -1341.1247115                     |           |           |           |
| Gsol = -1453.690729                      |           |           |           | Gsol = -1341.441490                    |           |           |           |
| 7                                        | 0.024475  | 2.423439  | 0.763125  | 7                                      | -0.527346 | 2.335293  | 0.731515  |
| 6                                        | 0.573033  | 1.949999  | -0.349929 | 6                                      | 0.094779  | 1.945333  | -0.375170 |
| 7                                        | 1.568933  | 2.714433  | -0.770209 | 7                                      | 0.983743  | 2.840163  | -0.780228 |
| 6                                        | 1.737804  | 3.862385  | 0.105612  | 6                                      | 0.973963  | 4.001462  | 0.094353  |
| 6                                        | 0.920790  | 3.431386  | 1.333484  | 6                                      | 0.215491  | 3.455567  | 1.312906  |
| 8                                        | 0.200810  | 0.960867  | -1.092531 | 8                                      | -0.124835 | 0.917990  | -1.124991 |
| 6                                        | -0.209249 | -0.354827 | -0.568872 | 6                                      | -0.397529 | -0.433534 | -0.609342 |
| 6                                        | 0.689315  | -0.701236 | 0.643829  | 6                                      | 0.505787  | -0.678097 | 0.626755  |
| 7                                        | 0.126688  | -1.691707 | 1.418969  | 7                                      | 0.023279  | -1.707410 | 1.404917  |
| 6                                        | 0.955330  | -1.997286 | 2.532366  | 6                                      | 0.845500  | -1.907498 | 2.546625  |
| 6                                        | 0.256332  | -2.965340 | 3.466917  | 6                                      | 0.222052  | -2.926113 | 3.480877  |
| 6                                        | 2.475351  | 2.390600  | -1.838000 | 6                                      | 1.952872  | 2.637883  | -1.823034 |
| 6                                        | 1.249092  | 5.142974  | -0.541939 | 6                                      | 0.310700  | 5.195561  | -0.563319 |
| 6                                        | 1.777983  | 2.850626  | 2.440752  | 6                                      | 1.138187  | 2.992980  | 2.423281  |
| 6                                        | -1.070797 | 1.868900  | 1.536630  | 6                                      | -1.548573 | 1.639007  | 1.494429  |
| 6                                        | -1.714406 | -0.413506 | -0.489741 | 6                                      | -1.888495 | -0.659661 | -0.565743 |
| 6                                        | -2.487289 | 0.512544  | -1.188398 | 6                                      | -2.745318 | 0.179374  | -1.273606 |
| 6                                        | -3.866489 | 0.420520  | -1.201799 | 6                                      | -4.104685 | -0.068547 | -1.318742 |
| 6                                        | -4.464393 | -0.620727 | -0.518525 | 6                                      | -4.623458 | -1.178356 | -0.660169 |
| 6                                        | -3.720382 | -1.569620 | 0.159350  | 6                                      | -3.767105 | -2.036303 | 0.026880  |
| 6                                        | -2.341081 | -1.472962 | 0.165469  | 6                                      | -2.408392 | -1.788027 | 0.066234  |
| 6                                        | 2.096513  | -0.954169 | 0.030971  | 6                                      | 1.941673  | -0.792183 | 0.039915  |
| 8                                        | 2.987188  | -0.132714 | 0.064619  | 8                                      | 2.727939  | 0.130456  | 0.043815  |
| 8                                        | 2.197681  | -2.153422 | -0.513532 | 8                                      | 2.189685  | -1.991590 | -0.454307 |
| 6                                        | 3.432059  | -2.652703 | -1.072996 | 6                                      | 3.478637  | -2.359319 | -0.991864 |
| 6                                        | 3.849338  | -1.810458 | -2.266124 | 6                                      | 3.800372  | -1.518493 | -2.215114 |
| 6                                        | 4.510693  | -2.700167 | -0.005641 | 6                                      | 4.548580  | -2.237236 | 0.078517  |
| 6                                        | 3.061159  | -4.055019 | -1.516097 | 6                                      | 3.281531  | -3.811788 | -1.381782 |
| 1                                        | 0.188443  | 5.072663  | -0.778175 | 1                                      | -0.726760 | 4.972119  | -0.807067 |
| 1                                        | 1.396961  | 5.984722  | 0.132578  | 1                                      | 0.330518  | 6.053243  | 0.107035  |
| 1                                        | 1.791606  | 5.354553  | -1.461181 | 1                                      | 0.824755  | 5.477543  | -1.480003 |
| 1                                        | 0.317684  | 4.260399  | 1.700431  | 1                                      | -0.499770 | 4.190256  | 1.679306  |
| 1                                        | 2.791460  | 3.947575  | 0.368469  | 1                                      | 2.000559  | 4.240967  | 0.368761  |
| 1                                        | 2.393079  | 2.037388  | 2.058017  | 1                                      | 1.866811  | 2.280401  | 2.039027  |
| 1                                        | 1.169043  | 2.458755  | 3.252728  | 1                                      | 0.585910  | 2.508567  | 3.225656  |
| 1                                        | 2.426182  | 3.624489  | 2.850095  | 1                                      | 1.665335  | 3.847634  | 2.845421  |
| 1                                        | 2.563345  | 3.234412  | -2.518519 | 1                                      | 1.969559  | 3.501619  | -2.483531 |
| 1                                        | 2.089175  | 1.536977  | -2.380141 | 1                                      | 1.677578  | 1.760584  | -2.394450 |
| 1                                        | 3.451019  | 2.133891  | -1.432314 | 1                                      | 2.937857  | 2.477279  | -1.390982 |
| 1                                        | -0.904252 | 0.828138  | 1.812918  | 1                                      | -1.268558 | 0.613508  | 1.736027  |
| 1                                        | -2.002470 | 1.950564  | 0.986761  | 1                                      | -2.490063 | 1.637882  | 0.954898  |

|                                        |           |           |           |                                        |           |           |           |
|----------------------------------------|-----------|-----------|-----------|----------------------------------------|-----------|-----------|-----------|
| 1                                      | -1.151300 | 2.462827  | 2.441392  | 1                                      | -1.681215 | 2.190681  | 2.419617  |
| 1                                      | 0.914026  | 0.248209  | 1.189954  | 1                                      | 0.626872  | 0.294464  | 1.165372  |
| 1                                      | 1.933439  | -2.445669 | 2.256791  | 1                                      | 1.872065  | -2.257100 | 2.306999  |
| 1                                      | 1.235358  | -1.089411 | 3.115321  | 1                                      | 1.013170  | -0.965298 | 3.118793  |
| 1                                      | -0.682062 | -2.535270 | 3.816258  | 1                                      | -0.767134 | -2.590592 | 3.791615  |
| 1                                      | 0.019212  | -3.886946 | 2.936488  | 1                                      | 0.100184  | -3.877459 | 2.964124  |
| 1                                      | 0.869805  | -3.213348 | 4.334185  | 1                                      | 0.829635  | -3.091535 | 4.371656  |
| 1                                      | 4.126518  | -0.807906 | -1.956609 | 1                                      | 3.950559  | -0.478540 | -1.943817 |
| 1                                      | 3.035544  | -1.750504 | -2.988258 | 1                                      | 2.991613  | -1.585117 | -2.942267 |
| 1                                      | 4.702840  | -2.272957 | -2.759943 | 1                                      | 4.708042  | -1.892178 | -2.686981 |
| 1                                      | 2.265937  | -4.023725 | -2.258582 | 1                                      | 2.489387  | -3.904618 | -2.122293 |
| 1                                      | 3.924598  | -4.554111 | -1.952488 | 1                                      | 4.199886  | -4.218191 | -1.802073 |
| 1                                      | 2.710480  | -4.637782 | -0.667405 | 1                                      | 3.003000  | -4.401200 | -0.511148 |
| 1                                      | 5.395824  | -3.194014 | -0.404924 | 1                                      | 5.486978  | -2.643239 | -0.297354 |
| 1                                      | 4.783101  | -1.702442 | 0.322518  | 1                                      | 4.703749  | -1.201810 | 0.363237  |
| 1                                      | 4.160417  | -3.268315 | 0.854120  | 1                                      | 4.260111  | -2.804426 | 0.961559  |
| 1                                      | -1.698615 | -2.157069 | 0.706606  | 1                                      | -1.707203 | -2.401912 | 0.617884  |
| 1                                      | -4.224344 | -2.370737 | 0.674446  | 1                                      | -4.171987 | -2.900279 | 0.531548  |
| 7                                      | -5.912410 | -0.720340 | -0.524204 | 6                                      | -6.028330 | -1.435025 | -0.698501 |
| 1                                      | -4.476428 | 1.130811  | -1.734621 | 1                                      | -4.762901 | 0.587364  | -1.867707 |
| 1                                      | -2.013256 | 1.313115  | -1.734843 | 1                                      | -2.353314 | 1.034256  | -1.803014 |
| 1                                      | 0.081519  | -1.005425 | -1.390378 | 1                                      | -0.016357 | -1.046116 | -1.423151 |
| 8                                      | -6.532945 | 0.136183  | -1.113728 | 7                                      | -7.162620 | -1.634555 | -0.729797 |
| 8                                      | -6.415473 | -1.650429 | 0.061500  |                                        |           |           |           |
| NImag = 1 (-16.7674 cm <sup>-1</sup> ) |           |           |           | NImag = 1 (-12.9993 cm <sup>-1</sup> ) |           |           |           |
| <b>TSr<sub>cis</sub>(COOMe)</b>        |           |           |           | <b>TSr<sub>cis</sub>(Cl)</b>           |           |           |           |
| Et = -1476.7214933                     |           |           |           | Et = -1708.5240001                     |           |           |           |
| Gsol = -1477.073875                    |           |           |           | Gsol = -1708.842251                    |           |           |           |
| 6                                      | -2.145515 | -1.220639 | 0.162866  | 6                                      | -2.338050 | -1.709809 | 0.130025  |
| 6                                      | -1.431440 | -0.226340 | -0.502202 | 6                                      | -1.795602 | -0.615097 | -0.538706 |
| 6                                      | -2.125838 | 0.749664  | -1.215267 | 6                                      | -2.641935 | 0.215275  | -1.265628 |
| 6                                      | -3.507623 | 0.763615  | -1.228472 | 6                                      | -4.010277 | -0.003437 | -1.293540 |
| 6                                      | -4.218800 | -0.210492 | -0.540983 | 6                                      | -4.531559 | -1.078486 | -0.598858 |
| 6                                      | -3.528713 | -1.201991 | 0.147644  | 6                                      | -3.703935 | -1.934311 | 0.106695  |
| 6                                      | 0.073860  | -0.290446 | -0.578224 | 6                                      | -0.301020 | -0.416302 | -0.598971 |
| 6                                      | 0.949926  | -0.690207 | 0.637168  | 6                                      | 0.615012  | -0.663085 | 0.627905  |
| 6                                      | 2.310749  | -1.115317 | 0.016031  | 6                                      | 2.039421  | -0.811003 | 0.021612  |
| 8                                      | 2.274240  | -2.338962 | -0.483966 | 8                                      | 2.264057  | -2.025972 | -0.447180 |
| 6                                      | 3.435645  | -2.978568 | -1.053500 | 6                                      | 3.537730  | -2.420207 | -0.999852 |
| 6                                      | 2.912470  | -4.347628 | -1.444319 | 6                                      | 3.317317  | -3.878911 | -1.352757 |
| 6                                      | -5.694360 | -0.146616 | -0.584397 | 17                                     | -6.243452 | -1.360868 | -0.624746 |
| 8                                      | 0.592720  | 0.983519  | -1.110762 | 8                                      | -0.012411 | 0.932611  | -1.119536 |
| 6                                      | 1.017991  | 1.950667  | -0.370681 | 6                                      | 0.204468  | 1.961012  | -0.372866 |
| 7                                      | 0.495789  | 2.462883  | 0.738044  | 7                                      | -0.412796 | 2.353689  | 0.736146  |

|   |           |           |           |   |           |           |           |
|---|-----------|-----------|-----------|---|-----------|-----------|-----------|
| 6 | 1.449206  | 3.418802  | 1.304081  | 6 | 0.327723  | 3.481023  | 1.305943  |
| 6 | 2.291677  | 3.795142  | 0.075895  | 6 | 1.071696  | 4.026748  | 0.079027  |
| 7 | 2.062864  | 2.650699  | -0.789447 | 7 | 1.091016  | 2.857675  | -0.783285 |
| 6 | -0.621872 | 1.967622  | 1.523115  | 6 | -1.419193 | 1.653787  | 1.516927  |
| 6 | 2.952400  | 2.263151  | -1.850013 | 6 | 2.042840  | 2.662873  | -1.842050 |
| 6 | 1.873272  | 5.094528  | -0.583668 | 6 | 0.388980  | 5.206819  | -0.584500 |
| 6 | 2.271577  | 2.794899  | 2.414773  | 6 | 1.264015  | 3.029322  | 2.409621  |
| 7 | 0.300157  | -1.576855 | 1.467590  | 7 | 0.127086  | -1.670215 | 1.431676  |
| 6 | 1.115728  | -1.916546 | 2.579822  | 6 | 0.962423  | -1.861526 | 2.564544  |
| 6 | 0.338421  | -2.759261 | 3.572510  | 6 | 0.336463  | -2.850980 | 3.528238  |
| 8 | 3.284109  | -0.393791 | 0.002444  | 8 | 2.837721  | 0.100444  | -0.012430 |
| 6 | 3.908003  | -2.220320 | -2.282381 | 6 | 3.846374  | -1.611646 | -2.248135 |
| 6 | 4.530615  | -3.106941 | -0.009448 | 6 | 4.629450  | -2.286415 | 0.047083  |
| 1 | 0.810797  | 5.078391  | -0.821495 | 1 | -0.646811 | 4.967620  | -0.820406 |
| 1 | 2.064654  | 5.933307  | 0.083661  | 1 | 0.401024  | 6.070181  | 0.078777  |
| 1 | 2.427758  | 5.268184  | -1.503771 | 1 | 0.894372  | 5.487830  | -1.506303 |
| 1 | 0.895653  | 4.283188  | 1.667650  | 1 | -0.388924 | 4.212373  | 1.676419  |
| 1 | 3.347673  | 3.827077  | 0.341602  | 1 | 2.096751  | 4.282485  | 0.344753  |
| 1 | 2.842379  | 1.948480  | 2.035451  | 1 | 1.994072  | 2.320497  | 2.021243  |
| 1 | 1.640890  | 2.436868  | 3.225624  | 1 | 0.722667  | 2.543078  | 3.218234  |
| 1 | 2.960199  | 3.533146  | 2.824024  | 1 | 1.789026  | 3.889036  | 2.824156  |
| 1 | 3.091886  | 3.091625  | -2.540948 | 1 | 1.965923  | 3.466501  | -2.571493 |
| 1 | 2.519228  | 1.426212  | -2.382401 | 1 | 1.836908  | 1.718082  | -2.327893 |
| 1 | 3.910908  | 1.954981  | -1.438684 | 1 | 3.049701  | 2.628198  | -1.432459 |
| 1 | -0.509358 | 0.918470  | 1.799294  | 1 | -1.127930 | 0.631965  | 1.761513  |
| 1 | -1.551252 | 2.097220  | 0.978978  | 1 | -2.366526 | 1.640072  | 0.988190  |
| 1 | -0.662188 | 2.568422  | 2.426189  | 1 | -1.544464 | 2.212420  | 2.439141  |
| 1 | 1.288024  | 0.251488  | 1.138761  | 1 | 0.763309  | 0.315711  | 1.150128  |
| 1 | 2.035487  | -2.479320 | 2.311610  | 1 | 1.979958  | -2.233080 | 2.317951  |
| 1 | 1.503510  | -1.017070 | 3.113603  | 1 | 1.154667  | -0.911010 | 3.115973  |
| 1 | -0.543877 | -2.216483 | 3.910969  | 1 | -0.641690 | -2.492076 | 3.847851  |
| 1 | -0.003120 | -3.675886 | 3.092743  | 1 | 0.189342  | -3.809356 | 3.031402  |
| 1 | 0.939028  | -3.027077 | 4.443117  | 1 | 0.955337  | -3.010569 | 4.412442  |
| 1 | 4.292784  | -1.242110 | -2.012592 | 1 | 4.013314  | -0.567629 | -2.003613 |
| 1 | 3.087087  | -2.098981 | -2.988575 | 1 | 3.023201  | -1.685295 | -2.958255 |
| 1 | 4.697597  | -2.782895 | -2.778910 | 1 | 4.740693  | -2.006928 | -2.728017 |
| 1 | 2.105685  | -4.255711 | -2.169117 | 1 | 2.509510  | -3.979077 | -2.075178 |
| 1 | 3.708984  | -4.945276 | -1.884510 | 1 | 4.222653  | -4.305404 | -1.781464 |
| 1 | 2.525707  | -4.866683 | -0.570263 | 1 | 3.049089  | -4.445296 | -0.463764 |
| 1 | 5.351155  | -3.698932 | -0.413421 | 1 | 5.555332  | -2.714345 | -0.335625 |
| 1 | 4.910552  | -2.133601 | 0.282894  | 1 | 4.803121  | -1.246411 | 0.302995  |
| 1 | 4.146116  | -3.612897 | 0.874237  | 1 | 4.349800  | -2.827473 | 0.949188  |
| 1 | -1.568628 | -1.948876 | 0.717456  | 1 | -1.649866 | -2.324998 | 0.696216  |
| 1 | -4.080069 | -1.962901 | 0.677390  | 1 | -4.125562 | -2.773789 | 0.637697  |
| 1 | -4.052580 | 1.518896  | -1.773940 | 1 | -4.661504 | 0.647408  | -1.856000 |
| 1 | -1.586619 | 1.503323  | -1.768897 | 1 | -2.240180 | 1.046768  | -1.825122 |

|   |                                        |           |           |   |                                        |           |           |
|---|----------------------------------------|-----------|-----------|---|----------------------------------------|-----------|-----------|
| 1 | 0.312590                               | -0.965412 | -1.396833 | 1 | 0.066258                               | -1.031300 | -1.417128 |
| 8 | -6.273955                              | -1.140414 | 0.088453  |   |                                        |           |           |
| 8 | -6.322978                              | 0.704430  | -1.158916 |   |                                        |           |           |
| 6 | -7.687162                              | -1.129285 | 0.081211  |   |                                        |           |           |
| 1 | -7.992872                              | -1.989751 | 0.664881  |   |                                        |           |           |
| 1 | -8.065853                              | -0.213983 | 0.527768  |   |                                        |           |           |
| 1 | -8.065995                              | -1.205746 | -0.934253 |   |                                        |           |           |
|   | NImag = 1 (-15.7331 cm <sup>-1</sup> ) |           |           |   | NImag = 1 (-19.5636 cm <sup>-1</sup> ) |           |           |
|   | <b>TSr<sub>cis</sub>(Me)</b>           |           |           |   | <b>TSr<sub>cis</sub>(OMe)</b>          |           |           |
|   | Et = -1288.2277244                     |           |           |   | Et = -1363.4036212                     |           |           |
|   | Gsol = -1288.524233                    |           |           |   | Gsol = -1363.724918                    |           |           |
| 6 | -2.133259                              | -2.274340 | 0.039437  | 6 | -2.438408                              | -1.482189 | 0.052374  |
| 6 | -1.816382                              | -1.089087 | -0.621700 | 6 | -1.795514                              | -0.451329 | -0.621239 |
| 6 | -2.799096                              | -0.470350 | -1.385290 | 6 | -2.566712                              | 0.416712  | -1.392214 |
| 6 | -4.082183                              | -0.993244 | -1.452838 | 6 | -3.941089                              | 0.295171  | -1.449135 |
| 6 | -4.415347                              | -2.157644 | -0.776674 | 6 | -4.578672                              | -0.722283 | -0.748481 |
| 6 | -3.416128                              | -2.785181 | -0.038117 | 6 | -3.818310                              | -1.613192 | -0.003309 |
| 6 | -0.401617                              | -0.565775 | -0.636747 | 6 | -0.290798                              | -0.356313 | -0.644376 |
| 6 | 0.514842                               | -0.603010 | 0.613387  | 6 | 0.579543                               | -0.650469 | 0.606593  |
| 6 | 1.954878                               | -0.442488 | 0.048355  | 6 | 1.994890                               | -0.944518 | 0.036387  |
| 8 | 2.433219                               | -1.575988 | -0.437561 | 8 | 2.110027                               | -2.184035 | -0.411640 |
| 6 | 3.775240                               | -1.693139 | -0.952765 | 6 | 3.348920                               | -2.704854 | -0.934854 |
| 6 | 3.861821                               | -3.155897 | -1.345262 | 6 | 2.996903                               | -4.140376 | -1.276642 |
| 6 | -5.800272                              | -2.727892 | -0.838395 | 8 | -5.924190                              | -0.764597 | -0.859008 |
| 8 | -0.402115                              | 0.821784  | -1.148297 | 8 | 0.101730                               | 0.973988  | -1.155557 |
| 6 | -0.434409                              | 1.864658  | -0.392679 | 6 | 0.353184                               | 1.986794  | -0.400900 |
| 7 | -1.163709                              | 2.109399  | 0.691139  | 7 | -0.275106                              | 2.417383  | 0.687673  |
| 6 | -0.690755                              | 3.354548  | 1.298393  | 6 | 0.508793                               | 3.501348  | 1.281316  |
| 6 | -0.025374                              | 4.058095  | 0.106565  | 6 | 1.332819                               | 3.995332  | 0.083607  |
| 7 | 0.259406                               | 2.932367  | -0.765640 | 7 | 1.306256                               | 2.828868  | -0.780943 |
| 6 | -2.019213                              | 1.198163  | 1.432138  | 6 | -1.337110                              | 1.770787  | 1.442056  |
| 6 | 1.276766                               | 2.948313  | -1.780463 | 6 | 2.286613                               | 2.567585  | -1.798752 |
| 6 | -0.906722                              | 5.089169  | -0.570916 | 6 | 0.753855                               | 5.218185  | -0.600991 |
| 6 | 0.273455                               | 3.087695  | 2.437711  | 6 | 1.371086                               | 3.004806  | 2.425537  |
| 7 | 0.244138                               | -1.686341 | 1.420862  | 7 | -0.005240                              | -1.580955 | 1.439188  |
| 6 | 1.080419                               | -1.678707 | 2.567961  | 6 | 0.797998                               | -1.799915 | 2.589148  |
| 6 | 0.666672                               | -2.770219 | 3.536278  | 6 | 0.078508                               | -2.694607 | 3.580178  |
| 8 | 2.557632                               | 0.608936  | 0.061531  | 8 | 2.880399                               | -0.117947 | 0.009492  |
| 6 | 3.954033                               | -0.804740 | -2.172148 | 6 | 3.756126                               | -1.945727 | -2.186220 |
| 6 | 4.786468                               | -1.374211 | 0.134218  | 6 | 4.429759                               | -2.663280 | 0.131000  |
| 1 | -1.862228                              | 4.649329  | -0.852327 | 1 | -0.285423                              | 5.045781  | -0.876501 |
| 1 | -1.095803                              | 5.923498  | 0.102704  | 1 | 0.796290                               | 6.078421  | 0.065234  |
| 1 | -0.434501                              | 5.485410  | -1.467713 | 1 | 1.310312                               | 5.467173  | -1.502466 |
| 1 | -1.554864                              | 3.920506  | 1.643107  | 1 | -0.176475                              | 4.277285  | 1.619350  |

|   |                                                                           |           |           |   |                                                                           |           |           |
|---|---------------------------------------------------------------------------|-----------|-----------|---|---------------------------------------------------------------------------|-----------|-----------|
| 1 | 0.916906                                                                  | 4.509107  | 0.415767  | 1 | 2.361899                                                                  | 4.183597  | 0.387919  |
| 1 | 1.145896                                                                  | 2.544973  | 2.076534  | 1 | 2.072829                                                                  | 2.249913  | 2.073786  |
| 1 | -0.189866                                                                 | 2.492618  | 3.221706  | 1 | 0.769740                                                                  | 2.559111  | 3.214802  |
| 1 | 0.597507                                                                  | 4.030696  | 2.876513  | 1 | 1.929479                                                                  | 3.835774  | 2.855002  |
| 1 | 1.096599                                                                  | 3.763357  | -2.478209 | 1 | 2.332241                                                                  | 3.400494  | -2.497063 |
| 1 | 1.250777                                                                  | 2.008659  | -2.317010 | 1 | 2.004953                                                                  | 1.669671  | -2.333494 |
| 1 | 2.257494                                                                  | 3.058543  | -1.323383 | 1 | 3.262324                                                                  | 2.408296  | -1.345075 |
| 1 | -1.504173                                                                 | 0.282954  | 1.725632  | 1 | -1.101161                                                                 | 0.737034  | 1.699868  |
| 1 | -2.893760                                                                 | 0.941028  | 0.844567  | 1 | -2.266913                                                                 | 1.797492  | 0.883700  |
| 1 | -2.340956                                                                 | 1.726942  | 2.324049  | 1 | -1.462957                                                                 | 2.343303  | 2.355878  |
| 1 | 0.433295                                                                  | 0.388183  | 1.128266  | 1 | 0.807310                                                                  | 0.328309  | 1.100996  |
| 1 | 2.159786                                                                  | -1.822542 | 2.344364  | 1 | 1.782912                                                                  | -2.266875 | 2.372306  |
| 1 | 1.052288                                                                  | -0.702967 | 3.109217  | 1 | 1.066536                                                                  | -0.849049 | 3.108577  |
| 1 | -0.371721                                                                 | -2.628134 | 3.835231  | 1 | -0.868795                                                                 | -2.241094 | 3.871494  |
| 1 | 0.738642                                                                  | -3.742569 | 3.050067  | 1 | -0.145391                                                                 | -3.654875 | 3.116654  |
| 1 | 1.289531                                                                  | -2.783504 | 4.432136  | 1 | 0.671091                                                                  | -2.873253 | 4.478821  |
| 1 | 3.905334                                                                  | 0.244312  | -1.898848 | 1 | 4.018644                                                                  | -0.919559 | -1.950345 |
| 1 | 3.180833                                                                  | -1.018155 | -2.909660 | 1 | 2.941127                                                                  | -1.948332 | -2.909430 |
| 1 | 4.921401                                                                  | -1.003057 | -2.632069 | 1 | 4.615686                                                                  | -2.431359 | -2.646624 |
| 1 | 3.115353                                                                  | -3.392899 | -2.101079 | 1 | 2.199000                                                                  | -4.171668 | -2.016173 |
| 1 | 4.848167                                                                  | -3.382598 | -1.746701 | 1 | 3.866143                                                                  | -4.657540 | -1.679690 |
| 1 | 3.680510                                                                  | -3.789327 | -0.479857 | 1 | 2.656082                                                                  | -4.666344 | -0.387654 |
| 1 | 5.791378                                                                  | -1.586873 | -0.229127 | 1 | 5.320008                                                                  | -3.175675 | -0.232370 |
| 1 | 4.731828                                                                  | -0.330676 | 0.426351  | 1 | 4.690938                                                                  | -1.641074 | 0.384251  |
| 1 | 4.600838                                                                  | -1.993124 | 1.010163  | 1 | 4.086026                                                                  | -3.170381 | 1.030766  |
| 1 | -1.351973                                                                 | -2.727534 | 0.634589  | 1 | -1.818893                                                                 | -2.136286 | 0.651410  |
| 1 | -3.646565                                                                 | -3.699761 | 0.492488  | 1 | -4.284352                                                                 | -2.417671 | 0.543592  |
| 1 | -4.829652                                                                 | -0.489130 | -2.050840 | 1 | -4.539354                                                                 | 0.971546  | -2.040781 |
| 1 | -2.570388                                                                 | 0.427772  | -1.940106 | 1 | -2.093062                                                                 | 1.204580  | -1.959415 |
| 1 | 0.117269                                                                  | -1.074845 | -1.445361 | 1 | 0.061970                                                                  | -0.988430 | -1.455782 |
| 1 | -6.282599                                                                 | -2.702564 | 0.139309  | 6 | -6.605150                                                                 | -1.778797 | -0.179131 |
| 1 | -6.429025                                                                 | -2.173129 | -1.532009 | 1 | -7.658223                                                                 | -1.636845 | -0.398638 |
| 1 | -5.785322                                                                 | -3.768627 | -1.161057 | 1 | -6.298607                                                                 | -2.768274 | -0.521593 |
|   |                                                                           |           |           | 1 | -6.452438                                                                 | -1.712775 | 0.899244  |
|   | NImag = 1 (-19.3401 cm <sup>-1</sup> )                                    |           |           |   | NImag = 1 (-12.1593 cm <sup>-1</sup> )                                    |           |           |
|   | <b>TSr<sub>cis</sub>(OH)</b><br>Et = -1324.1082491<br>Gsol = -1324.436972 |           |           |   | <b>TSf3-(NO<sub>2</sub>)</b><br>Et = -1453.3406178<br>Gsol = -1453.693049 |           |           |
| 6 | -1.988932                                                                 | -2.397464 | 0.026349  | 6 | 1.216578                                                                  | -1.993872 | -0.649372 |
| 6 | -1.739643                                                                 | -1.201941 | -0.641607 | 6 | 1.000306                                                                  | -1.036075 | 0.340317  |
| 6 | -2.755583                                                                 | -0.651401 | -1.417725 | 6 | 2.061576                                                                  | -0.666352 | 1.172914  |
| 6 | -4.006332                                                                 | -1.238803 | -1.492065 | 6 | 3.306671                                                                  | -1.238877 | 1.011075  |
| 6 | -4.251550                                                                 | -2.415287 | -0.800590 | 6 | 3.488847                                                                  | -2.195618 | 0.026741  |
| 6 | -3.236827                                                                 | -2.990661 | -0.048819 | 6 | 2.458454                                                                  | -2.578671 | -0.809067 |

|   |           |           |           |   |           |           |           |
|---|-----------|-----------|-----------|---|-----------|-----------|-----------|
| 6 | -0.360500 | -0.592189 | -0.650831 | 6 | -0.339658 | -0.404157 | 0.545705  |
| 6 | 0.549911  | -0.581897 | 0.604607  | 6 | -0.384958 | 1.115598  | 0.767955  |
| 6 | 1.978288  | -0.326767 | 0.046632  | 7 | 0.027408  | 1.235964  | 2.092841  |
| 8 | 2.539312  | -1.428870 | -0.422573 | 6 | -1.070074 | 1.127348  | 2.995273  |
| 6 | 3.886730  | -1.453411 | -0.936297 | 6 | -1.916448 | 2.397634  | 3.108873  |
| 6 | 4.080628  | -2.910454 | -1.311623 | 8 | -1.194641 | -0.854206 | -0.720537 |
| 8 | -5.486872 | -2.957839 | -0.897915 | 6 | -2.460744 | -0.846128 | -0.606584 |
| 8 | -0.448948 | 0.797808  | -1.148458 | 7 | -3.152086 | -1.543231 | 0.300460  |
| 6 | -0.562876 | 1.828935  | -0.385045 | 6 | -4.581226 | -1.377729 | 0.082848  |
| 7 | -1.311337 | 2.010457  | 0.697941  | 6 | -4.638435 | -0.236561 | -0.948041 |
| 6 | -0.946690 | 3.289561  | 1.308389  | 7 | -3.259892 | -0.138634 | -1.397308 |
| 6 | -0.329005 | 4.046007  | 0.123630  | 6 | -2.633369 | -2.689637 | 1.003025  |
| 7 | 0.051464  | 2.948187  | -0.746917 | 6 | -2.803810 | 0.911015  | -2.274986 |
| 6 | -2.102071 | 1.036096  | 1.431117  | 6 | -5.619337 | -0.474630 | -2.073584 |
| 6 | 1.054627  | 3.052277  | -1.769896 | 6 | -5.342716 | -1.089924 | 1.357306  |
| 6 | -1.281755 | 5.007729  | -0.559615 | 6 | 0.460222  | 1.819128  | -0.286099 |
| 6 | 0.024016  | 3.102100  | 2.458097  | 8 | 1.533322  | 2.394762  | 0.201406  |
| 7 | 0.342942  | -1.685358 | 1.405331  | 6 | 2.469482  | 3.110168  | -0.637284 |
| 6 | 1.164494  | -1.625917 | 2.561554  | 6 | 3.512328  | 3.583424  | 0.357376  |
| 6 | 0.815856  | -2.746702 | 3.522020  | 8 | 0.144811  | 1.821319  | -1.456126 |
| 8 | 2.502326  | 0.765946  | 0.046766  | 6 | 3.091469  | 2.172078  | -1.656174 |
| 6 | 4.001825  | -0.568968 | -2.166160 | 6 | 1.785861  | 4.296762  | -1.293601 |
| 6 | 4.871014  | -1.048848 | 0.146876  | 7 | 4.789938  | -2.813155 | -0.133036 |
| 1 | -2.198002 | 4.496980  | -0.851852 | 1 | 2.637501  | -3.319452 | -1.570368 |
| 1 | -1.541326 | 5.822592  | 0.114397  | 1 | 0.416573  | -2.275706 | -1.312873 |
| 1 | -0.832872 | 5.442808  | -1.450387 | 1 | 1.856869  | 0.085047  | 1.925291  |
| 1 | -1.857433 | 3.783133  | 1.644173  | 1 | 4.134125  | -0.961425 | 1.643054  |
| 1 | 0.572217  | 4.569097  | 0.441848  | 1 | -2.669641 | -2.538966 | 2.078917  |
| 1 | 0.943251  | 2.635837  | 2.106477  | 1 | -3.220912 | -3.571597 | 0.745982  |
| 1 | -0.396136 | 2.468252  | 3.235895  | 1 | -1.604765 | -2.864316 | 0.705435  |
| 1 | 0.262791  | 4.067903  | 2.901870  | 1 | -3.059727 | 0.681220  | -3.306902 |
| 1 | 0.761226  | 3.786487  | -2.517768 | 1 | -3.279514 | 1.849652  | -1.991549 |
| 1 | 1.172180  | 2.086193  | -2.242982 | 1 | -1.727924 | 1.028003  | -2.171385 |
| 1 | 2.005903  | 3.336375  | -1.325845 | 1 | -4.890292 | 0.698768  | -0.438163 |
| 1 | -1.526191 | 0.154263  | 1.713392  | 1 | -4.961420 | -2.298511 | -0.372230 |
| 1 | -2.960523 | 0.728015  | 0.844009  | 1 | -0.685926 | 0.890048  | 3.991345  |
| 1 | -2.454551 | 1.532926  | 2.329761  | 1 | -1.778821 | 0.293452  | 2.760015  |
| 1 | 0.403250  | 0.398400  | 1.125806  | 1 | -2.742220 | 2.278149  | 3.814632  |
| 1 | 2.253260  | -1.695479 | 2.349000  | 1 | -1.291597 | 3.224439  | 3.441613  |
| 1 | 1.064363  | -0.656351 | 3.105409  | 1 | -2.343167 | 2.679614  | 2.144423  |
| 1 | -0.232880 | -2.676731 | 3.810576  | 1 | -1.419419 | 1.438944  | 0.526339  |
| 1 | 0.959224  | -3.710085 | 3.033691  | 1 | -0.896551 | -0.843330 | 1.364516  |
| 1 | 1.428624  | -2.720979 | 4.424505  | 1 | -5.297576 | -1.931969 | 2.045174  |
| 1 | 3.879343  | 0.477240  | -1.905434 | 1 | -4.932193 | -0.214559 | 1.856818  |
| 1 | 3.245408  | -0.845154 | -2.900211 | 1 | -6.392188 | -0.905136 | 1.132672  |
| 1 | 4.980559  | -0.704310 | -2.624848 | 1 | -5.634439 | 0.363636  | -2.766859 |



|                                        |           |           |           |                                         |           |           |           |
|----------------------------------------|-----------|-----------|-----------|-----------------------------------------|-----------|-----------|-----------|
| 1                                      | 3.353636  | -3.210524 | -2.063986 | 1                                       | -5.361270 | -1.376103 | -2.626626 |
| 1                                      | 5.081012  | -3.068580 | -1.711197 | 1                                       | -6.625706 | -0.589351 | -1.673924 |
| 1                                      | 3.946414  | -3.545404 | -0.438771 | 1                                       | 4.286204  | 4.155232  | -0.151746 |
| 1                                      | 5.889079  | -1.193209 | -0.213293 | 1                                       | 3.053566  | 4.212034  | 1.117576  |
| 1                                      | 4.741056  | -0.008273 | 0.425153  | 1                                       | 3.975865  | 2.733978  | 0.854292  |
| 1                                      | 4.729301  | -1.668091 | 1.030764  | 1                                       | 2.529891  | 4.905538  | -1.805625 |
| 1                                      | -1.183772 | -2.796771 | 0.629648  | 1                                       | 1.042853  | 3.973689  | -2.015314 |
| 1                                      | -3.420607 | -3.913899 | 0.486888  | 1                                       | 1.302328  | 4.915573  | -0.539236 |
| 1                                      | -4.794088 | -0.805759 | -2.089574 | 1                                       | 3.887460  | 2.691706  | -2.188105 |
| 1                                      | -2.577456 | 0.254892  | -1.977682 | 1                                       | 3.524965  | 1.308146  | -1.155574 |
| 1                                      | 0.194364  | -1.055198 | -1.463281 | 1                                       | 2.355462  | 1.828775  | -2.375473 |
| 1                                      | -5.512410 | -3.767924 | -0.387190 | 8                                       | 4.915675  | -3.647660 | -1.001584 |
|                                        |           |           |           | 8                                       | 5.676823  | -2.459388 | 0.610023  |
| NImag = 1 (-25.3303 cm <sup>-1</sup> ) |           |           |           | NImag = 1 (-196.0943 cm <sup>-1</sup> ) |           |           |           |
| <b>TSf3-(CN)</b>                       |           |           |           | <b>TSf3-(COOMe)</b>                     |           |           |           |
| Et = -1341.1284062                     |           |           |           | Et = -1476.7244059                      |           |           |           |
| Gsol = -1341.444553                    |           |           |           | Gsol = -1477.076406                     |           |           |           |
| 7                                      | 3.067030  | -0.136136 | -1.392191 | 7                                       | -3.408814 | -0.578388 | -1.440855 |
| 6                                      | 2.345130  | 0.675131  | -0.627895 | 6                                       | -2.534076 | -1.105413 | -0.590254 |
| 7                                      | 3.104247  | 1.328174  | 0.257431  | 7                                       | -3.137659 | -1.847820 | 0.343694  |
| 6                                      | 4.508931  | 1.010739  | 0.048960  | 6                                       | -4.568009 | -1.915619 | 0.088614  |
| 6                                      | 4.448985  | -0.163234 | -0.944220 | 6                                       | -4.768146 | -0.858572 | -1.011511 |
| 8                                      | 1.086155  | 0.809145  | -0.747159 | 8                                       | -1.279731 | -0.923728 | -0.676016 |
| 6                                      | 0.189961  | 0.503902  | 0.524961  | 6                                       | -0.544646 | -0.286510 | 0.582358  |
| 6                                      | 0.056993  | -1.004816 | 0.791606  | 6                                       | -0.842732 | 1.216186  | 0.713016  |
| 6                                      | -0.861014 | -1.632745 | -0.248445 | 6                                       | -0.072021 | 1.988172  | -0.348849 |
| 8                                      | -0.524094 | -1.750588 | -1.406769 | 8                                       | -0.380684 | 1.943936  | -1.520333 |
| 6                                      | 2.707408  | 2.544719  | 0.920193  | 6                                       | -2.470545 | -2.863690 | 1.118254  |
| 6                                      | 5.238635  | 0.689789  | 1.333842  | 6                                       | -5.400446 | -1.674630 | 1.327919  |
| 6                                      | 5.446490  | -0.059219 | -2.075717 | 6                                       | -5.670434 | -1.310339 | -2.137527 |
| 6                                      | 2.506021  | -1.161906 | -2.236908 | 6                                       | -3.092914 | 0.481785  | -2.366452 |
| 6                                      | -1.067152 | 1.284650  | 0.301307  | 6                                       | 0.882894  | -0.715047 | 0.450971  |
| 6                                      | -1.182095 | 2.219024  | -0.725081 | 6                                       | 1.286839  | -1.654031 | -0.495205 |
| 6                                      | -2.348702 | 2.940205  | -0.897702 | 6                                       | 2.610467  | -2.047480 | -0.578881 |
| 6                                      | -3.426012 | 2.734295  | -0.043354 | 6                                       | 3.555152  | -1.506596 | 0.282176  |
| 6                                      | -3.322049 | 1.792532  | 0.979831  | 6                                       | 3.156677  | -0.561626 | 1.222638  |
| 6                                      | -2.153943 | 1.080519  | 1.156390  | 6                                       | 1.836574  | -0.171318 | 1.316301  |
| 6                                      | -4.628466 | 3.485115  | -0.215484 | 6                                       | 4.978598  | -1.895826 | 0.240257  |
| 7                                      | -0.370436 | -1.046115 | 2.117364  | 7                                       | -0.517618 | 1.484490  | 2.041322  |
| 6                                      | 0.730456  | -1.046753 | 3.021859  | 6                                       | -1.621665 | 1.244652  | 2.908300  |
| 6                                      | 1.419049  | -2.405780 | 3.171294  | 6                                       | -2.674744 | 2.356478  | 2.906503  |
| 8                                      | -2.022534 | -2.005769 | 0.234269  | 8                                       | 0.939327  | 2.671526  | 0.132300  |
| 6                                      | -3.040764 | -2.609799 | -0.595440 | 6                                       | 1.813449  | 3.449616  | -0.714913 |
| 6                                      | -2.541984 | -3.930731 | -1.154015 | 6                                       | 1.032357  | 4.566425  | -1.384666 |

|                                         |           |           |           |                                         |           |           |           |
|-----------------------------------------|-----------|-----------|-----------|-----------------------------------------|-----------|-----------|-----------|
| 6                                       | -4.174385 | -2.841554 | 0.385403  | 6                                       | 2.814391  | 4.018830  | 0.272621  |
| 6                                       | -3.473886 | -1.651150 | -1.690622 | 6                                       | 2.512756  | 2.554985  | -1.723421 |
| 1                                       | -2.428501 | 3.661454  | -1.696581 | 1                                       | 2.912643  | -2.773995 | -1.316577 |
| 1                                       | -0.362973 | 2.376317  | -1.406703 | 1                                       | 0.568930  | -2.070477 | -1.182223 |
| 1                                       | -2.032022 | 0.337358  | 1.934924  | 1                                       | 1.491766  | 0.563920  | 2.031511  |
| 1                                       | -4.159226 | 1.628671  | 1.641233  | 1                                       | 3.900151  | -0.145334 | 1.885360  |
| 1                                       | 2.732622  | 2.427776  | 2.000571  | 1                                       | -2.556196 | -2.663819 | 2.183278  |
| 1                                       | 3.381116  | 3.352676  | 0.632883  | 1                                       | -2.912831 | -3.836571 | 0.900675  |
| 1                                       | 1.700841  | 2.813514  | 0.617500  | 1                                       | -1.420171 | -2.895989 | 0.848198  |
| 1                                       | 2.775336  | -0.987505 | -3.276276 | 1                                       | -3.263486 | 0.156201  | -3.390301 |
| 1                                       | 2.892243  | -2.132991 | -1.928149 | 1                                       | -3.726982 | 1.343108  | -2.157426 |
| 1                                       | 1.424620  | -1.172549 | -2.124912 | 1                                       | -2.056513 | 0.782721  | -2.234364 |
| 1                                       | 4.606446  | -1.102735 | -0.405102 | 1                                       | -5.172690 | 0.055712  | -0.565723 |
| 1                                       | 4.980020  | 1.872438  | -0.435858 | 1                                       | -4.791659 | -2.908361 | -0.316629 |
| 1                                       | 0.375781  | -0.740779 | 4.010347  | 1                                       | -1.250423 | 1.137918  | 3.931800  |
| 1                                       | 1.535127  | -0.309762 | 2.771322  | 1                                       | -2.171289 | 0.289337  | 2.708286  |
| 1                                       | 2.250036  | -2.369365 | 3.880261  | 1                                       | -3.500401 | 2.142172  | 3.590158  |
| 1                                       | 0.698010  | -3.143916 | 3.517876  | 1                                       | -2.213028 | 3.296723  | 3.202752  |
| 1                                       | 1.813361  | -2.759227 | 2.216601  | 1                                       | -3.098444 | 2.501720  | 1.910806  |
| 1                                       | 1.047586  | -1.451346 | 0.562772  | 1                                       | -1.903208 | 1.351972  | 0.410697  |
| 1                                       | 0.792237  | 0.895887  | 1.335827  | 1                                       | -1.052462 | -0.761910 | 1.412776  |
| 1                                       | 5.281270  | 1.555111  | 1.992314  | 1                                       | -5.246676 | -2.458424 | 2.066988  |
| 1                                       | 4.740963  | -0.121079 | 1.862169  | 1                                       | -5.141641 | -0.719417 | 1.780504  |
| 1                                       | 6.263100  | 0.390526  | 1.117385  | 1                                       | -6.459141 | -1.666605 | 1.072508  |
| 1                                       | 5.376900  | -0.915103 | -2.743775 | 1                                       | -5.792799 | -0.527832 | -2.883463 |
| 1                                       | 5.278308  | 0.846643  | -2.655535 | 1                                       | -5.263486 | -2.193695 | -2.626559 |
| 1                                       | 6.460118  | -0.033356 | -1.678721 | 1                                       | -6.658772 | -1.552921 | -1.750018 |
| 1                                       | -5.016615 | -3.314167 | -0.116896 | 1                                       | 3.536488  | 4.649213  | -0.243566 |
| 1                                       | -3.845514 | -3.482570 | 1.200421  | 1                                       | 2.305203  | 4.613016  | 1.028318  |
| 1                                       | -4.506938 | -1.896612 | 0.809654  | 1                                       | 3.348291  | 3.215298  | 0.775277  |
| 1                                       | -3.357559 | -4.440462 | -1.665304 | 1                                       | 1.720131  | 5.223179  | -1.916070 |
| 1                                       | -1.729962 | -3.777086 | -1.857154 | 1                                       | 0.310272  | 4.170261  | -2.091235 |
| 1                                       | -2.194163 | -4.572042 | -0.345594 | 1                                       | 0.507587  | 5.158015  | -0.636034 |
| 1                                       | -4.339548 | -2.062524 | -2.208215 | 1                                       | 3.269760  | 3.131727  | -2.253807 |
| 1                                       | -3.759261 | -0.692980 | -1.259845 | 1                                       | 3.007690  | 1.730257  | -1.213675 |
| 1                                       | -2.678914 | -1.489105 | -2.410810 | 1                                       | 1.810232  | 2.150799  | -2.444630 |
| 7                                       | -5.597512 | 4.092504  | -0.356309 | 8                                       | 5.238307  | -2.804869 | -0.703562 |
| NImag = 1 (-167.8267 cm <sup>-1</sup> ) |           |           |           | 8                                       | 5.830040  | -1.455151 | 0.967008  |
|                                         |           |           |           | 6                                       | 6.589459  | -3.209479 | -0.788899 |
|                                         |           |           |           | 1                                       | 6.631249  | -3.936980 | -1.591406 |
|                                         |           |           |           | 1                                       | 7.230845  | -2.361411 | -1.012425 |
|                                         |           |           |           | 1                                       | 6.916204  | -3.656942 | 0.145823  |
|                                         |           |           |           | NImag = 1 (-175.1655 cm <sup>-1</sup> ) |           |           |           |
| <b>TSf3-(Cl)</b>                        |           |           |           | <b>TSf3-(H)</b>                         |           |           |           |

| Et = -1708.5272321<br>Gsol = -1708.845828 |           |           |           | Et = -1248.9207266<br>Gsol = -1249.215831 |           |           |           |
|-------------------------------------------|-----------|-----------|-----------|-------------------------------------------|-----------|-----------|-----------|
| 7                                         | -3.144650 | 0.078647  | -1.392548 | 7                                         | 3.048943  | 0.976663  | 0.162036  |
| 6                                         | -2.386720 | -0.706482 | -0.635050 | 6                                         | 2.186081  | 0.381420  | -0.667266 |
| 7                                         | -3.115238 | -1.401894 | 0.242982  | 7                                         | 2.750507  | -0.626393 | -1.325255 |
| 6                                         | -4.532285 | -1.142594 | 0.041720  | 6                                         | 4.095755  | -0.863036 | -0.829663 |
| 6                                         | -4.524925 | 0.042520  | -0.940027 | 6                                         | 4.371669  | 0.389636  | 0.019839  |
| 8                                         | -1.122986 | -0.783143 | -0.754845 | 8                                         | 0.975336  | 0.730551  | -0.827714 |
| 6                                         | -0.248867 | -0.452961 | 0.516872  | 6                                         | 0.039147  | 0.725352  | 0.446238  |
| 6                                         | -0.187005 | 1.058789  | 0.789652  | 6                                         | -0.378494 | -0.706154 | 0.821733  |
| 6                                         | 0.713640  | 1.724870  | -0.240705 | 6                                         | -1.412433 | -1.204167 | -0.176329 |
| 8                                         | 0.369750  | 1.862460  | -1.395219 | 8                                         | -1.106521 | -1.541761 | -1.300168 |
| 6                                         | -2.660912 | -2.603637 | 0.895717  | 6                                         | 2.008620  | -1.628359 | -2.050777 |
| 6                                         | -5.270101 | -0.863239 | 1.331915  | 6                                         | 5.106774  | -1.093026 | -1.930006 |
| 6                                         | -5.521230 | -0.090890 | -2.069427 | 6                                         | 5.033772  | 0.096623  | 1.347357  |
| 6                                         | -2.630334 | 1.142835  | -2.219463 | 6                                         | 2.873665  | 2.309706  | 0.680415  |
| 6                                         | 1.043205  | -1.177855 | 0.296669  | 6                                         | -1.038847 | 1.720509  | 0.142708  |
| 6                                         | 1.226333  | -2.066360 | -0.756698 | 6                                         | -2.088457 | 1.873234  | 1.051225  |
| 6                                         | 2.428486  | -2.735950 | -0.924365 | 6                                         | -3.095733 | 2.787489  | 0.799976  |
| 6                                         | 3.457772  | -2.512737 | -0.031164 | 6                                         | -3.074086 | 3.570876  | -0.345024 |
| 6                                         | 3.301375  | -1.624512 | 1.020017  | 6                                         | -2.036024 | 3.421924  | -1.247194 |
| 6                                         | 2.097911  | -0.965191 | 1.186518  | 6                                         | -1.025119 | 2.502621  | -1.007454 |
| 17                                        | 4.961181  | -3.356868 | -0.228309 | 7                                         | -0.793789 | -0.589318 | 2.148581  |
| 7                                         | 0.223676  | 1.128956  | 2.121110  | 6                                         | 0.301012  | -0.737233 | 3.047404  |
| 6                                         | -0.887781 | 1.072533  | 3.010344  | 6                                         | 0.733568  | -2.188520 | 3.278848  |
| 6                                         | -1.652523 | 2.392437  | 3.145902  | 8                                         | -2.638167 | -1.200470 | 0.293389  |
| 8                                         | 1.873892  | 2.102891  | 0.242202  | 6                                         | -3.771686 | -1.569420 | -0.520307 |
| 6                                         | 2.883588  | 2.722840  | -0.584152 | 6                                         | -3.898820 | -0.633352 | -1.709832 |
| 6                                         | 2.376122  | 4.049301  | -1.121744 | 6                                         | -3.662925 | -3.023804 | -0.943737 |
| 6                                         | 4.021959  | 2.945922  | 0.393428  | 6                                         | -4.939169 | -1.378543 | 0.429546  |
| 6                                         | 3.315920  | 1.781713  | -1.694977 | 1                                         | -3.859597 | 4.289231  | -0.531450 |
| 1                                         | 2.563224  | -3.422153 | -1.745924 | 1                                         | -2.008682 | 4.018363  | -2.148007 |
| 1                                         | 0.434481  | -2.233393 | -1.468411 | 1                                         | -0.233057 | 2.386397  | -1.729292 |
| 1                                         | 1.932455  | -0.250641 | 1.983537  | 1                                         | -2.085485 | 1.230111  | 1.921266  |
| 1                                         | 4.114667  | -1.455044 | 1.708695  | 1                                         | -3.903351 | 2.891253  | 1.510724  |
| 1                                         | -2.686820 | -2.495086 | 1.976942  | 1                                         | 2.885689  | 2.310572  | 1.767349  |
| 1                                         | -3.298438 | -3.439284 | 0.604989  | 1                                         | 3.674763  | 2.952621  | 0.313580  |
| 1                                         | -1.644114 | -2.823342 | 0.587385  | 1                                         | 1.925579  | 2.710812  | 0.337405  |
| 1                                         | -2.891553 | 0.973947  | -3.261829 | 1                                         | 2.319796  | -1.650057 | -3.092876 |
| 1                                         | -3.060216 | 2.090057  | -1.894489 | 1                                         | 2.191323  | -2.605941 | -1.604739 |
| 1                                         | -1.550408 | 1.202083  | -2.106469 | 1                                         | 0.944275  | -1.416249 | -1.980637 |
| 1                                         | -4.719693 | 0.968789  | -0.390239 | 1                                         | 4.061402  | -1.741832 | -0.177626 |
| 1                                         | -4.968984 | -2.018770 | -0.449349 | 1                                         | 4.990993  | 1.087742  | -0.553908 |
| 1                                         | -0.530816 | 0.790728  | 4.005535  | 1                                         | 0.021862  | -0.315409 | 4.017894  |
| 1                                         | -1.649164 | 0.291514  | 2.754921  | 1                                         | 1.225795  | -0.175881 | 2.755334  |
| 1                                         | -2.491006 | 2.312777  | 3.842859  | 1                                         | 1.567654  | -2.263168 | 3.981896  |

|                                         |           |           |           |                                         |           |           |           |
|-----------------------------------------|-----------|-----------|-----------|-----------------------------------------|-----------|-----------|-----------|
| 1                                       | -0.977933 | 3.169794  | 3.500432  | 1                                       | -0.105340 | -2.760195 | 3.672063  |
| 1                                       | -2.051291 | 2.721809  | 2.184379  | 1                                       | 1.043045  | -2.665369 | 2.346637  |
| 1                                       | -1.194258 | 1.460965  | 0.548063  | 1                                       | 0.504160  | -1.350812 | 0.622506  |
| 1                                       | -0.832662 | -0.873444 | 1.327381  | 1                                       | 0.704560  | 1.054492  | 1.236014  |
| 1                                       | -5.274802 | -1.735190 | 1.983022  | 1                                       | 5.233649  | 1.012329  | 1.900296  |
| 1                                       | -4.803746 | -0.037355 | 1.865531  | 1                                       | 4.397583  | -0.541908 | 1.957169  |
| 1                                       | -6.306843 | -0.604303 | 1.121658  | 1                                       | 5.986493  | -0.406293 | 1.187933  |
| 1                                       | -5.488957 | 0.774239  | -2.728393 | 1                                       | 4.877526  | -1.995172 | -2.493284 |
| 1                                       | -5.317592 | -0.982733 | -2.659531 | 1                                       | 5.124825  | -0.250535 | -2.619184 |
| 1                                       | -6.531637 | -0.162804 | -1.669823 | 1                                       | 6.101703  | -1.214567 | -1.504435 |
| 1                                       | 4.859125  | 3.430089  | -0.106561 | 1                                       | -5.873992 | -1.639447 | -0.063961 |
| 1                                       | 3.694364  | 3.573152  | 1.219661  | 1                                       | -4.818023 | -2.006777 | 1.309404  |
| 1                                       | 4.360542  | 1.996065  | 0.801612  | 1                                       | -4.992467 | -0.342446 | 0.756825  |
| 1                                       | 3.186552  | 4.570210  | -1.630171 | 1                                       | -4.583814 | -3.328920 | -1.439485 |
| 1                                       | 1.560907  | 3.901133  | -1.822366 | 1                                       | -2.831898 | -3.171171 | -1.625588 |
| 1                                       | 2.029043  | 4.677311  | -0.302632 | 1                                       | -3.520416 | -3.658266 | -0.070265 |
| 1                                       | 4.178569  | 2.203628  | -2.209393 | 1                                       | -4.836779 | -0.832207 | -2.227537 |
| 1                                       | 3.604684  | 0.818043  | -1.279020 | 1                                       | -3.905772 | 0.401970  | -1.373165 |
| 1                                       | 2.518721  | 1.628212  | -2.414540 | 1                                       | -3.078423 | -0.769154 | -2.406659 |
| NImag = 1 (-123.8707 cm <sup>-1</sup> ) |           |           |           | NImag = 1 (-133.4704 cm <sup>-1</sup> ) |           |           |           |
| <b>TSf3-(Me)</b>                        |           |           |           | <b>TSf4-(NO<sub>2</sub>)</b>            |           |           |           |
| Et = -1288.2309214                      |           |           |           | Et = -1453.3445396                      |           |           |           |
| Gsol = -1288.530923                     |           |           |           | Gsol = -1453.703433                     |           |           |           |
| 7                                       | 2.972005  | -0.332023 | -1.372730 | 6                                       | -2.820044 | -1.226683 | 0.071503  |
| 6                                       | 2.289596  | 0.540660  | -0.638436 | 6                                       | -2.214461 | 0.029691  | 0.119573  |
| 7                                       | 3.079447  | 1.187817  | 0.223957  | 6                                       | -3.000868 | 1.166364  | -0.078066 |
| 6                                       | 4.465995  | 0.793003  | 0.033201  | 6                                       | -4.349454 | 1.044592  | -0.346535 |
| 6                                       | 4.349205  | -0.411656 | -0.917671 | 6                                       | -4.920576 | -0.215560 | -0.391778 |
| 8                                       | 1.040580  | 0.732971  | -0.766066 | 6                                       | -4.171039 | -1.357118 | -0.180730 |
| 6                                       | 0.132977  | 0.538315  | 0.508242  | 6                                       | -0.744414 | 0.152283  | 0.387859  |
| 6                                       | -0.096615 | -0.953987 | 0.805429  | 6                                       | -0.094241 | 1.427759  | -0.131022 |
| 6                                       | -1.064503 | -1.524101 | -0.219723 | 7                                       | -0.553036 | 2.446048  | 0.734677  |
| 8                                       | -0.723134 | -1.767512 | -1.357686 | 6                                       | 0.087524  | 2.509375  | 2.009286  |
| 6                                       | 2.738740  | 2.445260  | 0.839925  | 6                                       | -0.615608 | 3.551374  | 2.858395  |
| 6                                       | 5.174971  | 0.481744  | 1.332149  | 8                                       | -0.171358 | -1.136710 | -0.283743 |
| 6                                       | 5.353719  | -0.398321 | -2.047725 | 6                                       | 0.905658  | -1.754825 | -0.005991 |
| 6                                       | 2.358317  | -1.369703 | -2.165038 | 7                                       | 1.330696  | -2.197724 | 1.180911  |
| 6                                       | -1.065688 | 1.403836  | 0.267795  | 6                                       | 2.690945  | -2.705633 | 1.025981  |
| 6                                       | -1.170171 | 2.242987  | -0.833781 | 6                                       | 2.719776  | -3.066819 | -0.460640 |
| 6                                       | -2.294962 | 3.035302  | -1.015381 | 7                                       | 1.703015  | -2.176635 | -0.987468 |
| 6                                       | -3.344173 | 3.015307  | -0.110006 | 6                                       | 0.864751  | -1.716771 | 2.456909  |
| 6                                       | -3.234859 | 2.163256  | 0.987166  | 6                                       | 1.373986  | -2.089839 | -2.382297 |
| 6                                       | -2.119233 | 1.373710  | 1.184676  | 6                                       | 4.072364  | -2.894567 | -1.110859 |
| 6                                       | -4.551354 | 3.885216  | -0.291266 | 6                                       | 3.012090  | -3.870086 | 1.932894  |

|   |           |           |                                         |   |           |           |                                        |
|---|-----------|-----------|-----------------------------------------|---|-----------|-----------|----------------------------------------|
| 7 | -0.516986 | -0.966178 | 2.136147                                | 6 | 1.414164  | 1.323679  | -0.170336                              |
| 6 | 0.591663  | -1.026586 | 3.027868                                | 8 | 1.929849  | 2.260756  | -0.946196                              |
| 6 | 1.203553  | -2.423058 | 3.177495                                | 6 | 3.342559  | 2.552649  | -0.996591                              |
| 8 | -2.281204 | -1.689457 | 0.244714                                | 6 | 3.850494  | 2.964098  | 0.373344                               |
| 6 | -3.364800 | -2.149367 | -0.589374                               | 8 | 2.070299  | 0.549830  | 0.500737                               |
| 6 | -3.088352 | -3.559452 | -1.081092                               | 6 | 4.104201  | 1.361660  | -1.551478                              |
| 6 | -4.544062 | -2.141607 | 0.365203                                | 6 | 3.411967  | 3.722079  | -1.960175                              |
| 6 | -3.603242 | -1.179011 | -1.733512                               | 7 | -6.337406 | -0.346597 | -0.660778                              |
| 1 | -2.352638 | 3.676947  | -1.884444                               | 1 | -4.965421 | 1.913416  | -0.509593                              |
| 1 | -0.381874 | 2.272109  | -1.568653                               | 1 | -2.520227 | 2.130572  | 0.039550                               |
| 1 | -2.027998 | 0.686722  | 2.015607                                | 1 | -2.230174 | -2.117251 | 0.218231                               |
| 1 | -4.041524 | 2.119497  | 1.707263                                | 1 | -4.647962 | -2.322282 | -0.218779                              |
| 1 | 2.749989  | 2.365487  | 1.923985                                | 1 | 2.214356  | -1.687648 | -2.942030                              |
| 1 | 3.454496  | 3.207647  | 0.530280                                | 1 | 1.116095  | -3.071715 | -2.781793                              |
| 1 | 1.748512  | 2.751814  | 0.518770                                | 1 | 0.524221  | -1.427651 | -2.497977                              |
| 1 | 2.630508  | -1.259382 | -3.212485                               | 1 | 1.186759  | -2.414155 | 3.223380                               |
| 1 | 2.698758  | -2.342232 | -1.809983                               | 1 | 1.257673  | -0.724584 | 2.671170                               |
| 1 | 1.277578  | -1.324563 | -2.050955                               | 1 | -0.219915 | -1.699746 | 2.471348                               |
| 1 | 4.458905  | -1.337770 | -0.344465                               | 1 | 3.382992  | -1.877643 | 1.206280                               |
| 1 | 4.982047  | 1.611766  | -0.479800                               | 1 | 2.379881  | -4.101713 | -0.589222                              |
| 1 | 0.266417  | -0.698554 | 4.020092                                | 1 | 1.159719  | 2.782758  | 1.961699                               |
| 1 | 1.437729  | -0.338579 | 2.770775                                | 1 | 0.091940  | 1.559671  | 2.589910                               |
| 1 | 2.044710  | -2.432842 | 3.876067                                | 1 | -0.142033 | 3.669053  | 3.834134                               |
| 1 | 0.444892  | -3.116642 | 3.536165                                | 1 | -0.602623 | 4.511100  | 2.344554                               |
| 1 | 1.564135  | -2.803285 | 2.219632                                | 1 | -1.657983 | 3.273100  | 3.007819                               |
| 1 | 0.860172  | -1.468500 | 0.571631                                | 1 | -0.445337 | 1.620136  | -1.148880                              |
| 1 | 0.760561  | 0.902957  | 1.313267                                | 1 | -0.498253 | 0.050911  | 1.434445                               |
| 1 | 5.258865  | 1.367134  | 1.959317                                | 1 | 4.051662  | -3.190673 | -2.157620                              |
| 1 | 4.634461  | -0.282861 | 1.886702                                | 1 | 4.402828  | -1.860315 | -1.047603                              |
| 1 | 6.183650  | 0.123259  | 1.131739                                | 1 | 4.806448  | -3.524317 | -0.611192                              |
| 1 | 5.240936  | -1.272219 | -2.685907                               | 1 | 3.072308  | -3.570485 | 2.976426                               |
| 1 | 5.233262  | 0.494178  | -2.659296                               | 1 | 2.263439  | -4.654494 | 1.836829                               |
| 1 | 6.366608  | -0.410777 | -1.648038                               | 1 | 3.982086  | -4.285536 | 1.665095                               |
| 1 | -5.443552 | -2.486250 | -0.142540                               | 1 | 4.883765  | 3.299619  | 0.291369                               |
| 1 | -4.347494 | -2.792690 | 1.214334                                | 1 | 3.252822  | 3.786115  | 0.761790                               |
| 1 | -4.715977 | -1.135411 | 0.741401                                | 1 | 3.804589  | 2.138902  | 1.076479                               |
| 1 | -3.968077 | -3.944600 | -1.595634                               | 1 | 4.443127  | 4.047887  | -2.084771                              |
| 1 | -2.246342 | -3.577239 | -1.765326                               | 1 | 3.016240  | 3.439353  | -2.933807                              |
| 1 | -2.873797 | -4.214401 | -0.238020                               | 1 | 2.824373  | 4.556057  | -1.583177                              |
| 1 | -4.518043 | -1.454824 | -2.257367                               | 1 | 5.148668  | 1.630741  | -1.702581                              |
| 1 | -3.719714 | -0.167505 | -1.348007                               | 1 | 4.052047  | 0.522172  | -0.865902                              |
| 1 | -2.778330 | -1.191833 | -2.438031                               | 1 | 3.688546  | 1.064430  | -2.513658                              |
| 1 | -4.558357 | 4.356689  | -1.271919                               | 8 | -6.802423 | -1.464486 | -0.706117                              |
| 1 | -5.472521 | 3.312368  | -0.189036                               | 8 | -6.976141 | 0.667156  | -0.828278                              |
| 1 | -4.582487 | 4.678564  | 0.456709                                |   |           |           |                                        |
|   |           |           | NImag = 1 (-113.6507 cm <sup>-1</sup> ) |   |           |           | NImag = 1 (-81.5629 cm <sup>-1</sup> ) |

| <b>TSf4-(CN)</b>    |           |           |           | <b>TSf4-(COOMe)</b> |           |           |           |
|---------------------|-----------|-----------|-----------|---------------------|-----------|-----------|-----------|
| Et = -1341.1322102  |           |           |           | Et = -1476.7280147  |           |           |           |
| Gsol = -1341.454254 |           |           |           | Gsol = -1477.086788 |           |           |           |
| 6                   | -3.082632 | -1.309654 | -0.043126 | 6                   | 2.598941  | 0.998914  | 0.197548  |
| 6                   | -2.503965 | -0.043324 | 0.027935  | 6                   | 1.915465  | -0.216395 | 0.201643  |
| 6                   | -3.309645 | 1.076284  | -0.182866 | 6                   | 2.635549  | -1.393560 | -0.003833 |
| 6                   | -4.647702 | 0.926326  | -0.485638 | 6                   | 3.995419  | -1.341579 | -0.236640 |
| 6                   | -5.216596 | -0.343857 | -0.559735 | 6                   | 4.671372  | -0.126362 | -0.245511 |
| 6                   | -4.424219 | -1.464078 | -0.331542 | 6                   | 3.962308  | 1.046715  | -0.021579 |
| 6                   | -1.043986 | 0.111483  | 0.336565  | 6                   | 0.434982  | -0.254271 | 0.437215  |
| 6                   | -0.408022 | 1.399674  | -0.164419 | 6                   | -0.287900 | -1.471442 | -0.115183 |
| 7                   | -0.909189 | 2.406572  | 0.692536  | 7                   | 0.068733  | -2.532657 | 0.749503  |
| 6                   | -0.297411 | 2.482351  | 1.980552  | 6                   | -0.595522 | -2.556076 | 2.013513  |
| 6                   | -1.040135 | 3.509759  | 2.813716  | 6                   | 0.016822  | -3.653782 | 2.863335  |
| 8                   | -0.425736 | -1.167295 | -0.321914 | 8                   | -0.047779 | 1.083080  | -0.233961 |
| 6                   | 0.658782  | -1.759805 | -0.021363 | 6                   | -1.092718 | 1.757811  | 0.022931  |
| 7                   | 1.069099  | -2.192905 | 1.174685  | 7                   | -1.521823 | 2.215272  | 1.203864  |
| 6                   | 2.444516  | -2.666414 | 1.049013  | 6                   | -2.849112 | 2.794416  | 1.022076  |
| 6                   | 2.513143  | -3.028630 | -0.435985 | 6                   | -2.821229 | 3.172149  | -0.460288 |
| 7                   | 1.487208  | -2.163142 | -0.985264 | 7                   | -1.845244 | 2.230372  | -0.972534 |
| 6                   | 0.565244  | -1.721641 | 2.439799  | 6                   | -1.112577 | 1.696816  | 2.484383  |
| 6                   | 1.185768  | -2.085294 | -2.386722 | 6                   | -1.485465 | 2.138486  | -2.359027 |
| 6                   | 3.874800  | -2.825454 | -1.057680 | 6                   | -4.164909 | 3.086009  | -1.145224 |
| 6                   | 2.775953  | -3.821169 | 1.964568  | 6                   | -3.132407 | 3.964365  | 1.934627  |
| 6                   | 1.102761  | 1.330856  | -0.169332 | 6                   | -1.783598 | -1.268450 | -0.194141 |
| 8                   | 1.613858  | 2.284185  | -0.928795 | 8                   | -2.334985 | -2.141172 | -1.022009 |
| 6                   | 3.020239  | 2.607273  | -0.947295 | 6                   | -3.757774 | -2.361695 | -1.099657 |
| 6                   | 3.491504  | 3.019184  | 0.435580  | 6                   | -4.299621 | -2.812370 | 0.244782  |
| 8                   | 1.762441  | 0.569577  | 0.512709  | 8                   | -2.412442 | -0.484277 | 0.491346  |
| 6                   | 3.818797  | 1.437236  | -1.494905 | 6                   | -4.459651 | -1.112871 | -1.604905 |
| 6                   | 3.083983  | 3.785361  | -1.900725 | 6                   | -3.871743 | -3.480275 | -2.118224 |
| 6                   | -6.603125 | -0.500769 | -0.862279 | 6                   | 6.126986  | -0.135771 | -0.488084 |
| 1                   | -5.262947 | 1.796771  | -0.655126 | 1                   | 4.557723  | -2.247621 | -0.403621 |
| 1                   | -2.852562 | 2.049863  | -0.047686 | 1                   | 2.097476  | -2.329594 | 0.079578  |
| 1                   | -2.478933 | -2.189443 | 0.113758  | 1                   | 2.060446  | 1.921003  | 0.351652  |
| 1                   | -4.861421 | -2.449500 | -0.383442 | 1                   | 4.479493  | 1.993249  | -0.022105 |
| 1                   | 2.025714  | -1.658729 | -2.928870 | 1                   | -2.333414 | 1.794043  | -2.945282 |
| 1                   | 0.965165  | -3.074196 | -2.791278 | 1                   | -1.157034 | 3.106465  | -2.740787 |
| 1                   | 0.319684  | -1.448079 | -2.520468 | 1                   | -0.675034 | 1.426267  | -2.459558 |
| 1                   | 0.887774  | -2.410118 | 3.214105  | 1                   | -1.408454 | 2.405719  | 3.251010  |
| 1                   | 0.929471  | -0.719953 | 2.660385  | 1                   | -1.567602 | 0.727660  | 2.680501  |
| 1                   | -0.519578 | -1.730575 | 2.431300  | 1                   | -0.031408 | 1.614752  | 2.519573  |
| 1                   | 3.111688  | -1.820946 | 1.241708  | 1                   | -3.587952 | 2.002174  | 1.175477  |
| 1                   | 2.200426  | -4.071448 | -0.569854 | 1                   | -2.419625 | 4.187441  | -0.567519 |
| 1                   | 0.769807  | 2.778240  | 1.956714  | 1                   | -1.684577 | -2.749588 | 1.950871  |

|                                        |           |           |           |                                         |           |           |           |
|----------------------------------------|-----------|-----------|-----------|-----------------------------------------|-----------|-----------|-----------|
| 1                                      | -0.286159 | 1.533400  | 2.562388  | 1                                       | -0.538379 | -1.613973 | 2.603167  |
| 1                                      | -0.590704 | 3.637244  | 3.799646  | 1                                       | -0.477766 | -3.743724 | 3.831831  |
| 1                                      | -1.035591 | 4.469517  | 2.299704  | 1                                       | -0.059684 | -4.605992 | 2.340917  |
| 1                                      | -2.079626 | 3.209993  | 2.940185  | 1                                       | 1.074798  | -3.454327 | 3.028090  |
| 1                                      | -0.739321 | 1.587113  | -1.189890 | 1                                       | 0.079245  | -1.679297 | -1.123942 |
| 1                                      | -0.823784 | 0.011181  | 1.388878  | 1                                       | 0.171125  | -0.143200 | 1.478296  |
| 1                                      | 3.883010  | -3.121786 | -2.104561 | 1                                       | -4.100554 | 3.391419  | -2.187602 |
| 1                                      | 4.179977  | -1.783901 | -0.987851 | 1                                       | -4.556019 | 2.072006  | -1.103079 |
| 1                                      | 4.612473  | -3.438190 | -0.542368 | 1                                       | -4.873757 | 3.752084  | -0.656225 |
| 1                                      | 2.807239  | -3.518618 | 3.008526  | 1                                       | -3.230605 | 3.657116  | 2.973087  |
| 1                                      | 2.049068  | -4.624053 | 1.854796  | 1                                       | -2.343545 | 4.711270  | 1.864223  |
| 1                                      | 3.761239  | -4.212887 | 1.717584  | 1                                       | -4.074287 | 4.430710  | 1.650612  |
| 1                                      | 4.518221  | 3.378942  | 0.376709  | 1                                       | -5.346813 | -3.094019 | 0.139070  |
| 1                                      | 2.867524  | 3.824143  | 0.818337  | 1                                       | -3.744278 | -3.678363 | 0.598823  |
| 1                                      | 3.450556  | 2.187549  | 1.131303  | 1                                       | -4.221383 | -2.023460 | 0.985774  |
| 1                                      | 4.110243  | 4.133797  | -2.002588 | 1                                       | -4.915674 | -3.750948 | -2.266995 |
| 1                                      | 2.713425  | 3.501878  | -2.883989 | 1                                       | -3.452718 | -3.171013 | -3.073960 |
| 1                                      | 2.471507  | 4.603783  | -1.529259 | 1                                       | -3.327595 | -4.357604 | -1.776049 |
| 1                                      | 4.860885  | 1.728497  | -1.618928 | 1                                       | -5.509639 | -1.332212 | -1.794205 |
| 1                                      | 3.767341  | 0.590570  | -0.818139 | 1                                       | -4.392764 | -0.313832 | -0.873810 |
| 1                                      | 3.431707  | 1.140570  | -2.469104 | 1                                       | -4.009128 | -0.781105 | -2.539810 |
| 7                                      | -7.720880 | -0.632889 | -1.109575 | 8                                       | 6.661831  | 1.089162  | -0.471836 |
| NImag = 1 (-92.8004 cm <sup>-1</sup> ) |           |           |           | 8                                       | 6.782737  | -1.125164 | -0.683604 |
|                                        |           |           |           | 6                                       | 8.055631  | 1.135284  | -0.698268 |
|                                        |           |           |           | 1                                       | 8.329132  | 2.183341  | -0.654131 |
|                                        |           |           |           | 1                                       | 8.587515  | 0.572540  | 0.064019  |
|                                        |           |           |           | 1                                       | 8.300692  | 0.720292  | -1.672134 |
|                                        |           |           |           | NImag = 1 (-112.1063 cm <sup>-1</sup> ) |           |           |           |
| <b>TSf4-(Cl)</b>                       |           |           |           | <b>TSf4-(H)</b>                         |           |           |           |
| Et = -1708.5308128                     |           |           |           | Et = -1248.9239962                      |           |           |           |
| Gsol = -1708.854724                    |           |           |           | Gsol = -1249.223766                     |           |           |           |
| 6                                      | -2.994355 | -1.280590 | 0.003593  | 7                                       | 0.866118  | -2.153352 | 1.129086  |
| 6                                      | -2.405141 | -0.021160 | 0.061788  | 6                                       | 0.492422  | -1.741715 | -0.087978 |
| 6                                      | -3.206775 | 1.098704  | -0.152674 | 7                                       | 1.451138  | -1.984945 | -0.985607 |
| 6                                      | -4.551051 | 0.957353  | -0.445815 | 6                                       | 2.543928  | -2.711074 | -0.369882 |
| 6                                      | -5.111650 | -0.306457 | -0.506711 | 6                                       | 2.301583  | -2.413032 | 1.111187  |
| 6                                      | -4.341575 | -1.430769 | -0.278688 | 8                                       | -0.635774 | -1.300757 | -0.462652 |
| 6                                      | -0.943010 | 0.130406  | 0.363657  | 6                                       | -1.489576 | -0.122552 | 0.167023  |
| 6                                      | -0.297974 | 1.405015  | -0.148638 | 6                                       | -0.976093 | 1.238996  | -0.256224 |
| 7                                      | -0.783231 | 2.422461  | 0.708148  | 6                                       | 0.524119  | 1.367674  | -0.132816 |
| 6                                      | -0.159445 | 2.501630  | 1.990313  | 8                                       | 1.218190  | 0.711540  | 0.620773  |
| 6                                      | -0.889830 | 3.539027  | 2.822326  | 6                                       | 1.250648  | -1.911249 | -2.404625 |
| 8                                      | -0.331518 | -1.162274 | -0.301039 | 6                                       | 3.907250  | -2.292359 | -0.867982 |
| 6                                      | 0.751297  | -1.758558 | -0.011371 | 6                                       | 2.728652  | -3.535874 | 2.027031  |

|    |           |           |           |   |           |           |           |
|----|-----------|-----------|-----------|---|-----------|-----------|-----------|
| 7  | 1.171604  | -2.193700 | 1.181488  | 6 | 0.196113  | -1.800322 | 2.354515  |
| 6  | 2.544150  | -2.670393 | 1.044233  | 6 | -2.879585 | -0.466600 | -0.281349 |
| 6  | 2.598224  | -3.034724 | -0.440827 | 6 | -3.798810 | 0.537746  | -0.579119 |
| 7  | 1.572709  | -2.164597 | -0.981954 | 6 | -5.073972 | 0.208929  | -1.005916 |
| 6  | 0.680671  | -1.717010 | 2.449511  | 6 | -5.463678 | -1.116036 | -1.124803 |
| 6  | 1.255114  | -2.091390 | -2.379822 | 6 | -4.561020 | -2.117751 | -0.811540 |
| 6  | 3.955567  | -2.839717 | -1.074611 | 6 | -3.280353 | -1.795479 | -0.393233 |
| 6  | 2.880930  | -3.824902 | 1.958242  | 7 | -1.663127 | 2.160218  | 0.572115  |
| 6  | 1.211715  | 1.326958  | -0.164494 | 6 | -1.190918 | 2.265182  | 1.915893  |
| 8  | 1.723226  | 2.270704  | -0.937649 | 6 | -2.124864 | 3.181486  | 2.684619  |
| 6  | 3.129930  | 2.587269  | -0.966072 | 8 | 0.971450  | 2.375779  | -0.866414 |
| 6  | 3.609688  | 3.013707  | 0.409603  | 6 | 2.303279  | 2.911066  | -0.738454 |
| 8  | 1.874060  | 0.570323  | 0.520192  | 6 | 3.334280  | 1.874052  | -1.149742 |
| 6  | 3.922328  | 1.408139  | -1.503451 | 6 | 2.298686  | 4.068426  | -1.719479 |
| 6  | 3.194728  | 3.753968  | -1.933562 | 6 | 2.539341  | 3.415296  | 0.673809  |
| 17 | -6.800858 | -0.484652 | -0.862253 | 1 | -6.463266 | -1.365410 | -1.450968 |
| 1  | -5.165124 | 1.828304  | -0.614780 | 1 | -5.773162 | 1.000196  | -1.235944 |
| 1  | -2.746957 | 2.072336  | -0.028578 | 1 | -3.492229 | 1.562403  | -0.410453 |
| 1  | -2.398236 | -2.165739 | 0.162680  | 1 | -2.583708 | -2.589165 | -0.169690 |
| 1  | -4.788146 | -2.411873 | -0.323929 | 1 | -4.850077 | -3.155940 | -0.893977 |
| 1  | 2.091532  | -1.673896 | -2.934453 | 1 | 2.063433  | -1.360734 | -2.871435 |
| 1  | 1.021558  | -3.080280 | -2.777541 | 1 | 1.197922  | -2.909305 | -2.842864 |
| 1  | 0.392373  | -1.447878 | -2.505406 | 1 | 0.318311  | -1.392827 | -2.595065 |
| 1  | 1.004700  | -2.405927 | 3.222945  | 1 | 0.543104  | -2.465683 | 3.138728  |
| 1  | 1.052298  | -0.716909 | 2.665000  | 1 | 0.397001  | -0.766402 | 2.629309  |
| 1  | -0.404204 | -1.718918 | 2.448409  | 1 | -0.872101 | -1.955868 | 2.246585  |
| 1  | 3.215783  | -1.826755 | 1.229697  | 1 | 2.817218  | -1.485622 | 1.377975  |
| 1  | 2.279431  | -4.076460 | -0.570168 | 1 | 2.401103  | -3.783694 | -0.551261 |
| 1  | 0.909368  | 2.792416  | 1.956783  | 1 | -0.166910 | 2.678441  | 2.008843  |
| 1  | -0.148525 | 1.557543  | 2.579490  | 1 | -1.131845 | 1.309549  | 2.482860  |
| 1  | -0.431846 | 3.671441  | 3.803838  | 1 | -1.795291 | 3.330154  | 3.714294  |
| 1  | -0.884590 | 4.494972  | 2.301084  | 1 | -2.176006 | 4.149915  | 2.189379  |
| 1  | -1.929834 | 3.245395  | 2.958782  | 1 | -3.131351 | 2.765284  | 2.695731  |
| 1  | -0.635998 | 1.591539  | -1.172037 | 1 | -1.245053 | 1.414435  | -1.301409 |
| 1  | -0.712402 | 0.024253  | 1.412764  | 1 | -1.344534 | -0.235833 | 1.230608  |
| 1  | 3.952708  | -3.137262 | -2.121217 | 1 | 4.044646  | -2.550017 | -1.916181 |
| 1  | 4.266524  | -1.799604 | -1.009108 | 1 | 4.047643  | -1.220192 | -0.751589 |
| 1  | 4.694764  | -3.455599 | -0.565180 | 1 | 4.682678  | -2.807520 | -0.303489 |
| 1  | 2.921036  | -3.521116 | 3.001569  | 1 | 2.626903  | -3.267411 | 3.075846  |
| 1  | 2.151216  | -4.626166 | 1.855376  | 1 | 2.143751  | -4.434405 | 1.838021  |
| 1  | 3.863335  | -4.219140 | 1.703755  | 1 | 3.779132  | -3.767047 | 1.858076  |
| 1  | 4.637756  | 3.368231  | 0.341884  | 1 | 3.500085  | 3.927040  | 0.722298  |
| 1  | 2.990558  | 3.825584  | 0.785539  | 1 | 1.758937  | 4.120180  | 0.952772  |
| 1  | 3.567870  | 2.190523  | 1.115256  | 1 | 2.539892  | 2.598499  | 1.388257  |
| 1  | 4.221925  | 4.097299  | -2.043649 | 1 | 3.263661  | 4.572479  | -1.714502 |
| 1  | 2.818982  | 3.460373  | -2.911913 | 1 | 2.096647  | 3.713315  | -2.728337 |



|                                         |           |           |           |                                         |           |           |           |
|-----------------------------------------|-----------|-----------|-----------|-----------------------------------------|-----------|-----------|-----------|
| 1                                       | 2.586720  | 4.578915  | -1.569223 | 1                                       | 1.526938  | 4.785970  | -1.450307 |
| 1                                       | 4.964781  | 1.694432  | -1.636298 | 1                                       | 4.322029  | 2.331837  | -1.186381 |
| 1                                       | 3.871122  | 0.570057  | -0.816127 | 1                                       | 3.352801  | 1.051540  | -0.442417 |
| 1                                       | 3.529156  | 1.100780  | -2.471920 | 1                                       | 3.103282  | 1.487032  | -2.141721 |
| NImag = 1 (-127.5062 cm <sup>-1</sup> ) |           |           |           | NImag = 1 (-157.9142 cm <sup>-1</sup> ) |           |           |           |
| <b>TSf4-(Me)</b>                        |           |           |           | <b>TS5(NO<sub>2</sub>)re-re</b>         |           |           |           |
| Et = -1288.2343472                      |           |           |           | Et = -1223.2476304                      |           |           |           |
| Gsol = -1288.539210                     |           |           |           |                                         |           |           |           |
| 6                                       | -3.202689 | -1.411906 | -0.127562 | 7                                       | 2.226797  | -0.407495 | 1.371714  |
| 6                                       | -2.655276 | -0.135989 | -0.060012 | 6                                       | 2.166545  | -0.147841 | 0.054106  |
| 6                                       | -3.486921 | 0.953517  | -0.317074 | 7                                       | 3.039061  | -0.920309 | -0.616967 |
| 6                                       | -4.811575 | 0.754490  | -0.655712 | 6                                       | 3.869471  | -1.671628 | 0.313653  |
| 6                                       | -5.364279 | -0.520754 | -0.733560 | 6                                       | 3.085032  | -1.550394 | 1.631621  |
| 6                                       | -4.535224 | -1.598338 | -0.460325 | 7                                       | 1.357123  | 0.744128  | -0.481841 |
| 6                                       | -1.213040 | 0.066698  | 0.297402  | 6                                       | 1.735375  | 1.513086  | -1.671279 |
| 6                                       | -0.589758 | 1.363035  | -0.181018 | 6                                       | 3.078905  | 2.191350  | -1.523292 |
| 7                                       | -1.126400 | 2.361456  | 0.668971  | 6                                       | 2.903074  | -1.292659 | -2.005595 |
| 6                                       | -0.560440 | 2.434397  | 1.978005  | 6                                       | 5.281235  | -1.124823 | 0.388649  |
| 6                                       | -1.345863 | 3.449559  | 2.787474  | 6                                       | 2.291999  | -2.791154 | 1.992496  |
| 8                                       | -0.525416 | -1.200525 | -0.358752 | 6                                       | 1.810083  | 0.516646  | 2.396560  |
| 6                                       | 0.567795  | -1.756967 | -0.038833 | 6                                       | 0.033146  | 0.894665  | 0.030887  |
| 7                                       | 0.968812  | -2.183919 | 1.164318  | 6                                       | -0.292814 | 2.182967  | 0.534980  |
| 6                                       | 2.363498  | -2.601167 | 1.067842  | 8                                       | -1.492213 | 2.198961  | 1.162314  |
| 6                                       | 2.478148  | -2.955223 | -0.416124 | 6                                       | -1.904155 | 3.462615  | 1.625613  |
| 7                                       | 1.437164  | -2.122870 | -0.985034 | 8                                       | 0.368989  | 3.202983  | 0.407914  |
| 6                                       | 0.418979  | -1.735818 | 2.418438  | 6                                       | -1.048568 | 0.070353  | -1.887473 |
| 6                                       | 1.157393  | -2.058494 | -2.391144 | 8                                       | -0.244897 | -0.763871 | -2.288538 |
| 6                                       | 3.845817  | -2.703902 | -1.006444 | 6                                       | -2.305014 | -0.323221 | -1.199780 |
| 6                                       | 2.720828  | -3.745213 | 1.987253  | 6                                       | -2.525891 | -1.665092 | -0.906589 |
| 6                                       | 0.920771  | 1.337660  | -0.150700 | 6                                       | -3.702638 | -2.066554 | -0.310547 |
| 8                                       | 1.422427  | 2.290348  | -0.922237 | 6                                       | -4.681924 | -1.119686 | -0.010346 |
| 6                                       | 2.810848  | 2.674984  | -0.892121 | 6                                       | -4.471917 | 0.224689  | -0.314207 |
| 6                                       | 3.203620  | 3.147135  | 0.496293  | 6                                       | -3.288471 | 0.614122  | -0.906523 |
| 8                                       | 1.590481  | 0.618588  | 0.566842  | 6                                       | -5.903573 | -1.529241 | 0.604972  |
| 6                                       | 3.686079  | 1.529182  | -1.370145 | 7                                       | -6.888014 | -1.861015 | 1.103676  |
| 6                                       | 2.864209  | 3.828046  | -1.876791 | 1                                       | 3.516829  | -0.669772 | -2.656295 |
| 6                                       | -6.808233 | -0.713937 | -1.086227 | 1                                       | 3.227403  | -2.324843 | -2.117483 |
| 1                                       | -5.435843 | 1.615976  | -0.853448 | 1                                       | 1.859126  | -1.219101 | -2.301764 |
| 1                                       | -3.069249 | 1.944006  | -0.187376 | 1                                       | 2.514712  | 0.452736  | 3.223152  |
| 1                                       | -2.584572 | -2.276579 | 0.062115  | 1                                       | 1.820014  | 1.530023  | 2.003876  |
| 1                                       | -4.932890 | -2.603302 | -0.509241 | 1                                       | 0.809569  | 0.299378  | 2.765172  |
| 1                                       | 1.990509  | -1.603464 | -2.920815 | 1                                       | 3.893061  | -2.711523 | -0.011671 |
| 1                                       | 0.978094  | -3.055181 | -2.797826 | 1                                       | 3.763360  | -1.294907 | 2.445807  |
| 1                                       | 0.271496  | -1.452301 | -2.539544 | 1                                       | 1.689124  | -2.619929 | 2.882284  |

|                                             |           |           |           |                                             |           |           |           |
|---------------------------------------------|-----------|-----------|-----------|---------------------------------------------|-----------|-----------|-----------|
| 1                                           | 0.746070  | -2.416178 | 3.198268  | 1                                           | 1.622824  | -3.064678 | 1.177972  |
| 1                                           | 0.742267  | -0.722701 | 2.650303  | 1                                           | 2.958499  | -3.629777 | 2.191168  |
| 1                                           | -0.664302 | -1.781652 | 2.381761  | 1                                           | 5.887260  | -1.717192 | 1.073328  |
| 1                                           | 2.993231  | -1.731107 | 1.277071  | 1                                           | 5.757984  | -1.146394 | -0.589623 |
| 1                                           | 2.204828  | -4.008216 | -0.558961 | 1                                           | 5.271675  | -0.093816 | 0.739756  |
| 1                                           | 0.503938  | 2.743078  | 1.998062  | 1                                           | -0.345476 | 0.030847  | 0.549255  |
| 1                                           | -0.560645 | 1.484345  | 2.557397  | 1                                           | 0.972298  | 2.277457  | -1.750027 |
| 1                                           | -0.936980 | 3.576410  | 3.791342  | 1                                           | 1.675123  | 0.893986  | -2.562307 |
| 1                                           | -1.331718 | 4.412236  | 2.278741  | 1                                           | -1.054090 | 1.093299  | -2.283874 |
| 1                                           | -2.386176 | 3.137497  | 2.869824  | 1                                           | -3.116793 | 1.655485  | -1.134755 |
| 1                                           | -0.902565 | 1.551425  | -1.211725 | 1                                           | -5.237240 | 0.949359  | -0.082632 |
| 1                                           | -1.015077 | -0.047547 | 1.352137  | 1                                           | -3.880059 | -3.106436 | -0.081761 |
| 1                                           | 3.887287  | -2.995903 | -2.053843 | 1                                           | -1.758674 | -2.377213 | -1.169611 |
| 1                                           | 4.112627  | -1.652497 | -0.927512 | 1                                           | -2.870329 | 3.307490  | 2.094661  |
| 1                                           | 4.592850  | -3.292461 | -0.476464 | 1                                           | -1.199273 | 3.866241  | 2.348925  |
| 1                                           | 2.715483  | -3.445364 | 3.032502  | 1                                           | -1.995099 | 4.173629  | 0.807590  |
| 1                                           | 2.029249  | -4.576085 | 1.858657  | 1                                           | 3.283254  | 2.789752  | -2.409589 |
| 1                                           | 3.726531  | -4.096276 | 1.762011  | 1                                           | 3.058697  | 2.853572  | -0.660740 |
| 1                                           | 4.213397  | 3.555808  | 0.469863  | 1                                           | 3.897017  | 1.481388  | -1.407869 |
| 1                                           | 2.524458  | 3.929036  | 0.829626  | NImag = 1 (-50.6779 cm <sup>-1</sup> )      |           |           |           |
| 1                                           | 3.172550  | 2.332897  | 1.212814  |                                             |           |           |           |
| 1                                           | 3.877178  | 4.221116  | -1.945150 |                                             |           |           |           |
| 1                                           | 2.550468  | 3.500258  | -2.866106 |                                             |           |           |           |
| 1                                           | 2.199199  | 4.626781  | -1.556224 |                                             |           |           |           |
| 1                                           | 4.717409  | 1.866974  | -1.463624 |                                             |           |           |           |
| 1                                           | 3.646975  | 0.702281  | -0.668682 |                                             |           |           |           |
| 1                                           | 3.352164  | 1.183769  | -2.348065 |                                             |           |           |           |
| 1                                           | -7.060427 | -1.769464 | -1.166400 |                                             |           |           |           |
| 1                                           | -7.461611 | -0.273639 | -0.332415 |                                             |           |           |           |
| 1                                           | -7.051307 | -0.239896 | -2.037193 |                                             |           |           |           |
| NImag = 1 (-146.5236 cm <sup>-1</sup> )     |           |           |           |                                             |           |           |           |
| <b>TS5(COOH)re-re</b><br>Et = -1319.5483509 |           |           |           | <b>TS5(COOMe)re-re</b><br>Et = -1358.843973 |           |           |           |
| 6                                           | -2.252713 | -1.394002 | -0.998609 | 7                                           | 2.639687  | -0.753376 | 1.345481  |
| 6                                           | -1.956812 | -0.059644 | -1.257757 | 6                                           | 2.712301  | -0.307256 | 0.078480  |
| 6                                           | -2.912484 | 0.916851  | -0.999278 | 7                                           | 3.533335  | -1.086864 | -0.647040 |
| 6                                           | -4.139499 | 0.568107  | -0.474365 | 6                                           | 4.190430  | -2.062841 | 0.211046  |
| 6                                           | -4.426583 | -0.765786 | -0.202176 | 6                                           | 3.322249  | -2.028224 | 1.480243  |
| 6                                           | -3.476524 | -1.748508 | -0.468535 | 7                                           | 2.065938  | 0.754584  | -0.358267 |
| 6                                           | -0.647899 | 0.287965  | -1.872782 | 6                                           | 2.607666  | 1.606693  | -1.420017 |
| 8                                           | 0.118731  | -0.580664 | -2.287466 | 6                                           | 4.013082  | 2.079644  | -1.123230 |
| 6                                           | -5.749972 | -1.086968 | 0.357977  | 6                                           | 3.447229  | -1.253771 | -2.079987 |
| 6                                           | 0.384635  | 0.953739  | 0.045457  | 6                                           | 5.646357  | -1.719021 | 0.455166  |

|   |           |           |           |   |           |           |           |
|---|-----------|-----------|-----------|---|-----------|-----------|-----------|
| 6 | 0.097123  | 2.230922  | 0.611166  | 6 | 2.352249  | -3.188096 | 1.592545  |
| 8 | 0.795635  | 3.230588  | 0.542376  | 6 | 2.266577  | 0.065967  | 2.470765  |
| 7 | 1.722434  | 0.775659  | -0.425461 | 6 | 0.727611  | 0.996118  | 0.083530  |
| 6 | 2.171490  | 1.589459  | -1.558330 | 6 | 0.512507  | 2.251604  | 0.728630  |
| 6 | 3.543383  | 2.186300  | -1.337822 | 8 | -0.704817 | 2.321125  | 1.308193  |
| 6 | 2.459738  | -0.200023 | 0.064795  | 6 | -1.026372 | 3.568374  | 1.876294  |
| 7 | 3.317343  | -0.967972 | -0.630656 | 8 | 1.279742  | 3.201397  | 0.744592  |
| 6 | 4.067106  | -1.830272 | 0.272689  | 6 | -0.280599 | 0.538421  | -1.878696 |
| 6 | 3.227495  | -1.772327 | 1.559984  | 8 | 0.429548  | -0.361598 | -2.330392 |
| 7 | 2.453800  | -0.559353 | 1.361078  | 6 | -1.634253 | 0.255655  | -1.329271 |
| 6 | 3.205864  | -1.244023 | -2.044774 | 6 | -2.037379 | -1.064833 | -1.159789 |
| 6 | 2.057190  | 0.310981  | 2.439091  | 6 | -3.301205 | -1.355629 | -0.687543 |
| 6 | 2.343500  | -2.985602 | 1.772105  | 6 | -4.185220 | -0.321762 | -0.389668 |
| 6 | 5.496979  | -1.360829 | 0.453317  | 6 | -3.790640 | 0.999523  | -0.573766 |
| 8 | -1.107582 | 2.255887  | 1.221373  | 6 | -2.524032 | 1.284257  | -1.040790 |
| 6 | -1.498265 | 3.512442  | 1.721369  | 6 | -5.550022 | -0.569410 | 0.114449  |
| 1 | 3.869491  | -0.612775 | -2.635715 | 8 | -6.348627 | 0.291355  | 0.379280  |
| 1 | 3.484399  | -2.281737 | -2.213499 | 8 | -5.822427 | -1.869405 | 0.254204  |
| 1 | 2.174927  | -1.100649 | -2.361587 | 1 | 4.173495  | -0.633700 | -2.605541 |
| 1 | 2.741459  | 0.162247  | 3.272121  | 1 | 3.654754  | -2.295057 | -2.316046 |
| 1 | 2.119400  | 1.346338  | 2.115118  | 1 | 2.439578  | -1.011983 | -2.412260 |
| 1 | 1.040946  | 0.115607  | 2.775845  | 1 | 2.900143  | -0.198749 | 3.314916  |
| 1 | 4.058201  | -2.841252 | -0.133800 | 1 | 2.424111  | 1.113730  | 2.229257  |
| 1 | 3.877312  | -1.630488 | 2.423641  | 1 | 1.224397  | -0.069752 | 2.753263  |
| 1 | 1.704123  | -2.851359 | 2.642545  | 1 | 4.116334  | -3.040571 | -0.264336 |
| 1 | 1.704804  | -3.145542 | 0.904599  | 1 | 3.957184  | -1.988532 | 2.365504  |
| 1 | 2.946921  | -3.879091 | 1.929008  | 1 | 1.701791  | -3.067066 | 2.456741  |
| 1 | 6.042408  | -2.033559 | 1.114328  | 1 | 1.726178  | -3.246740 | 0.703359  |
| 1 | 6.017926  | -1.328813 | -0.501814 | 1 | 2.889559  | -4.129597 | 1.702056  |
| 1 | 5.517009  | -0.361032 | 0.885037  | 1 | 6.120892  | -2.475289 | 1.079570  |
| 1 | -0.027171 | 0.087731  | 0.534378  | 1 | 6.193774  | -1.663318 | -0.483967 |
| 1 | 1.452061  | 2.396827  | -1.611369 | 1 | 5.731143  | -0.755194 | 0.955478  |
| 1 | 2.103076  | 1.024837  | -2.484160 | 1 | 0.245715  | 0.132336  | 0.508157  |
| 1 | -0.598686 | 1.315846  | -2.256321 | 1 | 1.952116  | 2.468269  | -1.435360 |
| 1 | -2.685182 | 1.952471  | -1.206837 | 1 | 2.525648  | 1.112725  | -2.384247 |
| 1 | -4.893502 | 1.311882  | -0.267236 | 1 | -0.145474 | 1.579702  | -2.201768 |
| 1 | -3.709511 | -2.782624 | -0.267594 | 1 | -2.214373 | 2.310184  | -1.179229 |
| 1 | -1.505827 | -2.135907 | -1.237446 | 1 | -4.494119 | 1.785166  | -0.344600 |
| 1 | -2.479143 | 3.365584  | 2.161104  | 1 | -3.616565 | -2.378803 | -0.555550 |
| 1 | -0.800156 | 3.870624  | 2.474631  | 1 | -1.339932 | -1.846351 | -1.421140 |
| 1 | -1.551507 | 4.253740  | 0.927387  | 1 | -2.024962 | 3.459706  | 2.286106  |
| 1 | 3.801021  | 2.825183  | -2.180925 | 1 | -0.324847 | 3.834835  | 2.663541  |
| 1 | 3.534072  | 2.796406  | -0.437411 | 1 | -1.013318 | 4.357208  | 1.127711  |
| 1 | 4.321510  | 1.429596  | -1.246324 | 1 | 4.345577  | 2.750434  | -1.913677 |
| 8 | -5.928156 | -2.395594 | 0.583721  | 1 | 4.021398  | 2.627888  | -0.183838 |
| 8 | -6.611110 | -0.282665 | 0.603082  | 1 | 4.727559  | 1.259672  | -1.062178 |

|                     |                                        |           |           |                                        |           |           |           |
|---------------------|----------------------------------------|-----------|-----------|----------------------------------------|-----------|-----------|-----------|
| 1                   | -6.818083                              | -2.481532 | 0.941747  | 6                                      | -7.119805 | -2.161316 | 0.731298  |
|                     |                                        |           |           | 1                                      | -7.179183 | -3.242226 | 0.787118  |
|                     | NImag = 1 (-87.6305 cm <sup>-1</sup> ) |           |           | 1                                      | -7.276297 | -1.721834 | 1.712667  |
|                     |                                        |           |           | 1                                      | -7.874718 | -1.775069 | 0.051922  |
|                     |                                        |           |           | NImag = 1 (-95.2445 cm <sup>-1</sup> ) |           |           |           |
| <b>TS5(Cl)re-re</b> |                                        |           |           | <b>TS5(F)re-re</b>                     |           |           |           |
| Et = -1590.6461899  |                                        |           |           | Et = -1230.2420361                     |           |           |           |
| 6                   | -3.164334                              | 0.693690  | -0.929515 | 7                                      | 2.933922  | -0.772673 | -0.658581 |
| 6                   | -2.164899                              | -0.244643 | -1.148442 | 6                                      | 2.026319  | -0.053687 | 0.024631  |
| 6                   | -2.407829                              | -1.575724 | -0.833536 | 7                                      | 2.123477  | -0.306513 | 1.342516  |
| 6                   | -3.616783                              | -1.966167 | -0.288771 | 6                                      | 3.042215  | -1.404092 | 1.587778  |
| 6                   | -4.595000                              | -1.010058 | -0.069530 | 6                                      | 3.820022  | -1.470928 | 0.262502  |
| 6                   | -4.381838                              | 0.319907  | -0.390061 | 7                                      | 1.163732  | 0.800112  | -0.488500 |
| 6                   | -0.867002                              | 0.129507  | -1.774988 | 6                                      | 1.453089  | 1.550134  | -1.712532 |
| 8                   | -0.077308                              | -0.736040 | -2.165600 | 6                                      | 2.762339  | 2.303469  | -1.635629 |
| 17                  | -6.118883                              | -1.489408 | 0.608700  | 6                                      | 1.670635  | 0.591725  | 2.373460  |
| 6                   | 0.153090                               | 0.909941  | 0.030810  | 6                                      | 2.317417  | -2.688355 | 1.939932  |
| 6                   | -0.188537                              | 2.195440  | 0.554407  | 6                                      | 5.194021  | -0.833787 | 0.324485  |
| 8                   | 0.449397                               | 3.227551  | 0.422702  | 6                                      | 2.785437  | -1.174531 | -2.039484 |
| 7                   | 1.494395                               | 0.786322  | -0.453279 | 6                                      | -0.173778 | 0.839379  | 0.022876  |
| 6                   | 1.875765                               | 1.570108  | -1.630482 | 6                                      | -0.604167 | 2.120161  | 0.495927  |
| 6                   | 3.225420                               | 2.234086  | -1.473371 | 8                                      | -1.766042 | 2.041340  | 1.178218  |
| 6                   | 2.281126                               | -0.144372 | 0.047279  | 6                                      | -2.304849 | 3.276650  | 1.584897  |
| 7                   | 2.317692                               | -0.461429 | 1.354144  | 8                                      | -0.059008 | 3.192291  | 0.291973  |
| 6                   | 3.148719                               | -1.632000 | 1.574550  | 6                                      | -1.169028 | -0.096200 | -1.677492 |
| 6                   | 3.962046                               | -1.696110 | 0.270806  | 8                                      | -0.326185 | -0.921898 | -2.052560 |
| 7                   | 3.157607                               | -0.895432 | -0.642331 | 6                                      | -2.423652 | -0.539782 | -1.007146 |
| 6                   | 1.904331                               | 0.424644  | 2.412425  | 6                                      | -3.491636 | 0.326711  | -0.813752 |
| 6                   | 3.025518                               | -1.225451 | -2.043640 | 6                                      | -4.666365 | -0.113827 | -0.230271 |
| 6                   | 5.374536                               | -1.162422 | 0.403521  | 6                                      | -4.755695 | -1.435574 | 0.156368  |
| 6                   | 2.324214                               | -2.874846 | 1.846640  | 6                                      | -3.716861 | -2.325791 | -0.030376 |
| 8                   | -1.375356                              | 2.180296  | 1.197799  | 6                                      | -2.552874 | -1.868358 | -0.620541 |
| 6                   | -1.821503                              | 3.433797  | 1.657686  | 1                                      | 3.351676  | -0.530299 | -2.712158 |
| 1                   | 3.646749                               | -0.586331 | -2.671064 | 1                                      | 3.162271  | -2.189678 | -2.142770 |
| 1                   | 3.346753                               | -2.255041 | -2.183781 | 1                                      | 1.729779  | -1.162578 | -2.304164 |
| 1                   | 1.981167                               | -1.139199 | -2.337142 | 1                                      | 2.398103  | 0.584076  | 3.182671  |
| 1                   | 2.612587                               | 0.335945  | 3.233870  | 1                                      | 1.601502  | 1.600061  | 1.974195  |
| 1                   | 1.911018                               | 1.450246  | 2.053404  | 1                                      | 0.696811  | 0.310159  | 2.769774  |
| 1                   | 0.905993                               | 0.193832  | 2.779292  | 1                                      | 3.907756  | -2.506006 | -0.066310 |
| 1                   | 3.987108                               | -2.719157 | -0.103398 | 1                                      | 3.711897  | -1.120217 | 2.399781  |
| 1                   | 3.810232                               | -1.432780 | 2.417784  | 1                                      | 1.711343  | -2.558141 | 2.834532  |
| 1                   | 1.700977                               | -2.740491 | 2.728714  | 1                                      | 1.658896  | -2.987131 | 1.125628  |
| 1                   | 1.672109                               | -3.089621 | 1.001224  | 1                                      | 3.028255  | -3.492804 | 2.126062  |
| 1                   | 2.969930                               | -3.735966 | 2.015645  | 1                                      | 5.845522  | -1.387618 | 0.999684  |

|                                          |           |           |           |                                           |           |           |           |
|------------------------------------------|-----------|-----------|-----------|-------------------------------------------|-----------|-----------|-----------|
| 1                                        | 5.962507  | -1.790895 | 1.071613  | 1                                         | 5.658801  | -0.820964 | -0.659661 |
| 1                                        | 5.872115  | -1.138998 | -0.564235 | 1                                         | 5.122012  | 0.193527  | 0.679315  |
| 1                                        | 5.362351  | -0.149553 | 0.803966  | 1                                         | -0.424588 | -0.009938 | 0.635343  |
| 1                                        | -0.190217 | 0.050900  | 0.581704  | 1                                         | 0.648637  | 2.271393  | -1.783926 |
| 1                                        | 1.119724  | 2.342350  | -1.697013 | 1                                         | 1.392371  | 0.900232  | -2.581036 |
| 1                                        | 1.807994  | 0.964460  | -2.529883 | 1                                         | -1.272992 | 0.870013  | -2.192505 |
| 1                                        | -0.874490 | 1.130003  | -2.229876 | 1                                         | -3.402165 | 1.359044  | -1.120671 |
| 1                                        | -2.988243 | 1.730014  | -1.180189 | 1                                         | -5.506972 | 0.544162  | -0.073136 |
| 1                                        | -5.160621 | 1.046751  | -0.219101 | 1                                         | -3.837980 | -3.354314 | 0.273622  |
| 1                                        | -3.810497 | -2.999421 | -0.044872 | 1                                         | -1.723725 | -2.533423 | -0.810068 |
| 1                                        | -1.631516 | -2.296882 | -1.041060 | 1                                         | -3.230512 | 3.042159  | 2.099882  |
| 1                                        | -2.780790 | 3.252623  | 2.130986  | 1                                         | -1.626281 | 3.800519  | 2.254256  |
| 1                                        | -1.124632 | 3.859978  | 2.375820  | 1                                         | -2.504168 | 3.919932  | 0.730978  |
| 1                                        | -1.936016 | 4.137405  | 0.836371  | 1                                         | 2.901935  | 2.882555  | -2.546940 |
| 1                                        | 3.434934  | 2.843339  | -2.351022 | 1                                         | 2.738622  | 2.992526  | -0.794221 |
| 1                                        | 3.212707  | 2.884392  | -0.601551 | 1                                         | 3.621859  | 1.643137  | -1.527951 |
| 1                                        | 4.037094  | 1.515396  | -1.367779 | 9                                         | -5.885806 | -1.868960 | 0.720767  |
| NImag = 1 (-125.5409 cm <sup>-1</sup> )  |           |           |           | NImag = 1 (-149.5615 cm <sup>-1</sup> )   |           |           |           |
| <b>TS5(H)re-re</b><br>Et = -1131.0393205 |           |           |           | <b>TS5(Me)re-re</b><br>Et = -1170.3495188 |           |           |           |
| 7                                        | 1.923363  | -0.132026 | 1.325719  | 7                                         | 2.953220  | -0.759582 | -0.663083 |
| 6                                        | 1.773768  | 0.055146  | 0.001181  | 6                                         | 2.040171  | -0.059949 | 0.033135  |
| 7                                        | 2.735576  | -0.597506 | -0.675237 | 7                                         | 2.114722  | -0.364476 | 1.341957  |
| 6                                        | 3.699456  | -1.175148 | 0.251660  | 6                                         | 3.014808  | -1.482837 | 1.557865  |
| 6                                        | 2.945070  | -1.128559 | 1.590659  | 6                                         | 3.814063  | -1.506127 | 0.244219  |
| 7                                        | 0.818791  | 0.797079  | -0.521180 | 7                                         | 1.194025  | 0.823408  | -0.456198 |
| 6                                        | 0.997124  | 1.506185  | -1.790104 | 6                                         | 1.499530  | 1.604578  | -1.656199 |
| 6                                        | 2.213549  | 2.404604  | -1.783475 | 6                                         | 2.811286  | 2.349069  | -1.544076 |
| 6                                        | 2.600342  | -1.073493 | -2.034315 | 6                                         | 1.657741  | 0.498203  | 2.400664  |
| 6                                        | 5.010866  | -0.415040 | 0.257868  | 6                                         | 2.267210  | -2.770458 | 1.844431  |
| 6                                        | 2.350477  | -2.460198 | 2.005591  | 6                                         | 5.195013  | -0.890919 | 0.354912  |
| 6                                        | 1.414862  | 0.763434  | 2.332496  | 6                                         | 2.822346  | -1.110027 | -2.060213 |
| 6                                        | -0.503514 | 0.726871  | 0.026422  | 6                                         | -0.152077 | 0.849537  | 0.035320  |
| 6                                        | -1.052112 | 1.983876  | 0.441547  | 6                                         | -0.589285 | 2.120962  | 0.532163  |
| 8                                        | -2.180139 | 1.827821  | 1.164338  | 8                                         | -1.750685 | 2.023254  | 1.210540  |
| 6                                        | -2.834405 | 3.023187  | 1.516478  | 6                                         | -2.305113 | 3.248359  | 1.625877  |
| 8                                        | -0.625199 | 3.091747  | 0.161599  | 8                                         | -0.048961 | 3.199026  | 0.349179  |
| 6                                        | -1.427877 | -0.394551 | -1.580553 | 6                                         | -1.113973 | -0.042539 | -1.674045 |
| 8                                        | -0.508452 | -1.139624 | -1.948365 | 8                                         | -0.268908 | -0.868601 | -2.051234 |
| 6                                        | -2.603680 | -0.941902 | -0.843726 | 6                                         | -2.384567 | -0.490779 | -1.035955 |
| 6                                        | -2.564179 | -2.251032 | -0.379437 | 6                                         | -3.460477 | 0.369842  | -0.868580 |
| 6                                        | -3.655979 | -2.796864 | 0.271749  | 6                                         | -4.646352 | -0.083895 | -0.319342 |
| 6                                        | -4.805093 | -2.041123 | 0.455587  | 6                                         | -4.790656 | -1.408368 | 0.080117  |
| 6                                        | -4.855357 | -0.738830 | -0.018256 | 6                                         | -3.711802 | -2.268509 | -0.102389 |

|   |                                           |           |           |   |                                           |           |           |
|---|-------------------------------------------|-----------|-----------|---|-------------------------------------------|-----------|-----------|
| 6 | -3.759445                                 | -0.193331 | -0.664738 | 6 | -2.527574                                 | -1.818982 | -0.656383 |
| 1 | 1.544456                                  | -1.197106 | -2.267909 | 6 | -6.065569                                 | -1.890849 | 0.704124  |
| 1 | 3.070141                                  | -0.397350 | -2.748593 | 1 | 1.769113                                  | -1.094239 | -2.335244 |
| 1 | 3.093094                                  | -2.040311 | -2.107076 | 1 | 3.393043                                  | -0.437743 | -2.700930 |
| 1 | 1.208487                                  | 1.732236  | 1.886543  | 1 | 3.207427                                  | -2.118051 | -2.196444 |
| 1 | 0.500769                                  | 0.393287  | 2.793162  | 1 | 0.679618                                  | 0.207567  | 2.779631  |
| 1 | 2.174163                                  | 0.886979  | 3.102594  | 1 | 2.378834                                  | 0.458997  | 3.214831  |
| 1 | 3.875074                                  | -2.210136 | -0.040313 | 1 | 1.596031                                  | 1.520257  | 2.036809  |
| 1 | 3.600835                                  | -0.752454 | 2.376222  | 1 | 3.894055                                  | -2.528190 | -0.124755 |
| 1 | 1.750156                                  | -2.352637 | 2.907045  | 1 | 3.673732                                  | -1.241252 | 2.392105  |
| 1 | 1.709123                                  | -2.850140 | 1.216449  | 1 | 1.648256                                  | -2.668914 | 2.733937  |
| 1 | 3.136865                                  | -3.187140 | 2.206403  | 1 | 1.617963                                  | -3.025205 | 1.007985  |
| 1 | 5.723214                                  | -0.881561 | 0.937606  | 1 | 2.964027                                  | -3.591964 | 2.007918  |
| 1 | 5.452516                                  | -0.399053 | -0.736849 | 1 | 5.827660                                  | -1.480437 | 1.017781  |
| 1 | 4.853618                                  | 0.614842  | 0.575846  | 1 | 5.676650                                  | -0.844735 | -0.620095 |
| 1 | -0.646721                                 | -0.103094 | 0.697424  | 1 | 5.130556                                  | 0.122221  | 0.749764  |
| 1 | 0.113720                                  | 2.125290  | -1.881320 | 1 | -0.405559                                 | -0.009433 | 0.633054  |
| 1 | 0.994539                                  | 0.806078  | -2.620399 | 1 | 0.698858                                  | 2.330769  | -1.717609 |
| 1 | -1.661458                                 | 0.521736  | -2.143142 | 1 | 1.445769                                  | 0.977815  | -2.541813 |
| 1 | -3.796563                                 | 0.822332  | -1.033579 | 1 | -1.210329                                 | 0.927367  | -2.185215 |
| 1 | -5.751552                                 | -0.149586 | 0.114853  | 1 | -3.368725                                 | 1.403022  | -1.174727 |
| 1 | -5.661081                                 | -2.468056 | 0.958475  | 1 | -5.477125                                 | 0.599210  | -0.201352 |
| 1 | -3.618744                                 | -3.816952 | 0.627812  | 1 | -3.809698                                 | -3.307963 | 0.182746  |
| 1 | -1.667087                                 | -2.824627 | -0.559965 | 1 | -1.696835                                 | -2.487655 | -0.827726 |
| 1 | -3.717455                                 | 2.725882  | 2.072224  | 1 | -3.233343                                 | 2.999019  | 2.129066  |
| 1 | -2.197712                                 | 3.653115  | 2.133662  | 1 | -1.637925                                 | 3.771344  | 2.307395  |
| 1 | -3.121130                                 | 3.590065  | 0.633814  | 1 | -2.502949                                 | 3.898901  | 0.777170  |
| 1 | 2.272534                                  | 2.944381  | -2.727178 | 1 | 2.965659                                  | 2.949977  | -2.438750 |
| 1 | 2.125964                                  | 3.131729  | -0.979201 | 1 | 2.780331                                  | 3.017040  | -0.686044 |
| 1 | 3.143205                                  | 1.850467  | -1.660086 | 1 | 3.665989                                  | 1.681655  | -1.441490 |
|   | NImag = 1 (-153.9732 cm <sup>-1</sup> )   |           |           | 1 | -6.227936                                 | -2.949707 | 0.510169  |
|   |                                           |           |           | 1 | -6.049778                                 | -1.758019 | 1.787352  |
|   |                                           |           |           | 1 | -6.927054                                 | -1.344396 | 0.324009  |
|   |                                           |           |           |   | NImag = 1 (-162.2721 cm <sup>-1</sup> )   |           |           |
|   | <b>TS5(OMe)re-re</b><br>Et = -1245.524757 |           |           |   | <b>TS5(OH)re-re</b><br>Et = -1206.2292462 |           |           |
| 6 | -3.118756                                 | 0.869313  | -0.948516 | 7 | 2.943823                                  | -0.744707 | -0.667542 |
| 6 | -2.145306                                 | -0.110724 | -1.118384 | 6 | 2.030201                                  | -0.047307 | 0.029856  |
| 6 | -2.466841                                 | -1.420940 | -0.805612 | 7 | 2.109004                                  | -0.349973 | 1.338885  |
| 6 | -3.717761                                 | -1.759681 | -0.313173 | 6 | 3.010593                                  | -1.467482 | 1.553331  |
| 6 | -4.674998                                 | -0.767798 | -0.139525 | 6 | 3.808808                                  | -1.487505 | 0.239224  |
| 6 | -4.369385                                 | 0.550772  | -0.465979 | 7 | 1.181183                                  | 0.835025  | -0.456894 |
| 6 | -0.804073                                 | 0.202317  | -1.685427 | 6 | 1.477639                                  | 1.608794  | -1.663740 |
| 8 | -0.043039                                 | -0.708404 | -2.052555 | 6 | 2.787298                                  | 2.358652  | -1.562967 |

|   |           |           |           |   |           |           |           |
|---|-----------|-----------|-----------|---|-----------|-----------|-----------|
| 8 | -5.924819 | -0.984537 | 0.328692  | 6 | 1.651822  | 0.511038  | 2.398556  |
| 6 | -6.283507 | -2.293106 | 0.657757  | 6 | 2.264456  | -2.756348 | 1.838013  |
| 6 | 0.186459  | 0.935324  | 0.064064  | 6 | 5.187091  | -0.866127 | 0.348392  |
| 6 | -0.151152 | 2.213738  | 0.619741  | 6 | 2.809703  | -1.100082 | -2.063407 |
| 8 | 0.478001  | 3.251021  | 0.495791  | 6 | -0.166320 | 0.851956  | 0.033533  |
| 7 | 1.537381  | 0.818371  | -0.403164 | 6 | -0.613625 | 2.125517  | 0.519938  |
| 6 | 1.931860  | 1.628255  | -1.556756 | 8 | -1.774333 | 2.024008  | 1.199440  |
| 6 | 3.299249  | 2.251691  | -1.386561 | 6 | -2.334176 | 3.248110  | 1.610613  |
| 6 | 2.288884  | -0.166100 | 0.044730  | 8 | -0.084128 | 3.206547  | 0.326366  |
| 7 | 2.304467  | -0.555098 | 1.333359  | 6 | -1.122300 | -0.055573 | -1.640178 |
| 6 | 3.085147  | -1.768734 | 1.491273  | 8 | -0.272001 | -0.880360 | -2.016417 |
| 6 | 3.922365  | -1.774194 | 0.202196  | 6 | -2.389878 | -0.515928 | -1.005434 |
| 7 | 3.154239  | -0.901473 | -0.676300 | 6 | -3.475993 | 0.329488  | -0.838234 |
| 6 | 1.906310  | 0.279423  | 2.437067  | 6 | -4.658198 | -0.131308 | -0.285217 |
| 6 | 3.017348  | -1.167384 | -2.091928 | 6 | -4.763985 | -1.457508 | 0.110222  |
| 6 | 5.343302  | -1.281972 | 0.392626  | 6 | -3.687263 | -2.318884 | -0.060156 |
| 6 | 2.206354  | -2.993317 | 1.656282  | 6 | -2.517537 | -1.845805 | -0.618955 |
| 8 | -1.325406 | 2.178106  | 1.280740  | 8 | -5.893555 | -1.965020 | 0.658286  |
| 6 | -1.787153 | 3.422395  | 1.749561  | 1 | 3.376063  | -0.427664 | -2.707810 |
| 1 | 3.652718  | -0.513700 | -2.689592 | 1 | 3.198329  | -2.107003 | -2.197472 |
| 1 | 3.320060  | -2.195637 | -2.275682 | 1 | 1.755169  | -1.089562 | -2.333923 |
| 1 | 1.972950  | -1.050958 | -2.377157 | 1 | 2.378469  | 0.480344  | 3.208171  |
| 1 | 2.615616  | 0.141148  | 3.251017  | 1 | 1.579162  | 1.531476  | 2.032380  |
| 1 | 1.925655  | 1.321262  | 2.129767  | 1 | 0.678837  | 0.212917  | 2.785070  |
| 1 | 0.905811  | 0.044660  | 2.795996  | 1 | 3.892817  | -2.509176 | -0.129730 |
| 1 | 3.932016  | -2.773193 | -0.232160 | 1 | 3.669405  | -1.225991 | 2.387666  |
| 1 | 3.733792  | -1.654003 | 2.359827  | 1 | 1.645508  | -2.657091 | 2.727769  |
| 1 | 1.566971  | -2.895972 | 2.531694  | 1 | 1.615365  | -3.010414 | 1.001237  |
| 1 | 1.567672  | -3.119365 | 0.783153  | 1 | 2.962219  | -3.577323 | 2.000026  |
| 1 | 2.813324  | -3.890050 | 1.777256  | 1 | 5.823155  | -1.452858 | 1.010455  |
| 1 | 5.904688  | -1.962344 | 1.032224  | 1 | 5.667280  | -0.817740 | -0.627218 |
| 1 | 5.859375  | -1.211869 | -0.563109 | 1 | 5.118668  | 0.146717  | 0.743370  |
| 1 | 5.345562  | -0.294573 | 0.852572  | 1 | -0.405413 | 0.000863  | 0.648358  |
| 1 | -0.149922 | 0.074382  | 0.616302  | 1 | 0.674300  | 2.331887  | -1.726705 |
| 1 | 1.196300  | 2.421652  | -1.595915 | 1 | 1.421663  | 0.975570  | -2.544511 |
| 1 | 1.845412  | 1.051888  | -2.473717 | 1 | -1.234804 | 0.904407  | -2.167730 |
| 1 | -0.769453 | 1.186019  | -2.178589 | 1 | -3.399331 | 1.363876  | -1.143416 |
| 1 | -2.890791 | 1.895762  | -1.201270 | 1 | -5.500065 | 0.538611  | -0.162291 |
| 1 | -5.132334 | 1.302984  | -0.333395 | 1 | -3.795135 | -3.350849 | 0.238510  |
| 1 | -3.937939 | -2.790468 | -0.083339 | 1 | -1.676238 | -2.501920 | -0.786484 |
| 1 | -1.716305 | -2.179255 | -0.973660 | 1 | -3.257671 | 2.995949  | 2.121166  |
| 1 | -2.743631 | 3.225378  | 2.221890  | 1 | -1.666433 | 3.779384  | 2.285034  |
| 1 | -1.094551 | 3.852605  | 2.469591  | 1 | -2.540964 | 3.892478  | 0.759273  |
| 1 | -1.911861 | 4.129253  | 0.932657  | 1 | 2.935720  | 2.953424  | -2.462730 |
| 1 | 3.520712  | 2.882521  | -2.245851 | 1 | 2.758226  | 3.032900  | -0.709769 |
| 1 | 3.308225  | 2.874888  | -0.495029 | 1 | 3.644693  | 1.694935  | -1.459124 |

|                                             |           |           |           |                                              |           |           |           |
|---------------------------------------------|-----------|-----------|-----------|----------------------------------------------|-----------|-----------|-----------|
| 1                                           | 4.092260  | 1.509406  | -1.306816 | 1                                            | -6.554938 | -1.274164 | 0.707540  |
| 1                                           | -7.309142 | -2.248228 | 1.009354  | NImag = 1 (-180.5649 cm <sup>-1</sup> )      |           |           |           |
| 1                                           | -6.232003 | -2.955220 | -0.208448 |                                              |           |           |           |
| 1                                           | -5.651744 | -2.696733 | 1.451195  | NImag = 1 (-173.9790 cm <sup>-1</sup> )      |           |           |           |
|                                             |           |           |           |                                              |           |           |           |
| <b>TS6(COOH)re-si</b><br>Et = -1319.5472439 |           |           |           | <b>TS6(COOMe)re-si</b><br>Et = -1358.8428596 |           |           |           |
| 6                                           | 2.781607  | 0.685054  | -1.202877 | 7                                            | -3.693912 | 0.784737  | 0.021965  |
| 6                                           | 1.914967  | -0.404092 | -1.206368 | 6                                            | -2.801977 | -0.209314 | 0.189634  |
| 6                                           | 2.360724  | -1.629937 | -0.723251 | 7                                            | -3.416774 | -1.404113 | 0.149242  |
| 6                                           | 3.635630  | -1.757957 | -0.211297 | 6                                            | -4.860984 | -1.225608 | 0.080408  |
| 6                                           | 4.490049  | -0.660627 | -0.187524 | 6                                            | -4.996781 | 0.249472  | -0.332513 |
| 6                                           | 4.058050  | 0.563496  | -0.691547 | 7                                            | -1.513285 | -0.007275 | 0.374834  |
| 6                                           | 0.554040  | -0.303211 | -1.812388 | 6                                            | -0.701206 | -0.916459 | 1.186018  |
| 8                                           | -0.185646 | -1.286087 | -1.910139 | 6                                            | -1.245254 | -1.073902 | 2.588169  |
| 6                                           | 5.840398  | -0.846440 | 0.369453  | 6                                            | -2.776826 | -2.636595 | -0.252550 |
| 6                                           | -0.533218 | 0.973485  | -0.357745 | 6                                            | -5.539304 | -1.560527 | 1.393860  |
| 6                                           | 0.150613  | 1.939195  | 0.446013  | 6                                            | -5.315319 | 0.449131  | -1.801347 |
| 8                                           | 0.345920  | 1.884902  | 1.646829  | 6                                            | -3.498294 | 2.131693  | 0.493802  |
| 7                                           | -1.242798 | -0.037318 | 0.361752  | 6                                            | -0.846695 | 1.014841  | -0.369162 |
| 6                                           | -0.473738 | -0.973072 | 1.185108  | 6                                            | -0.158381 | 1.998699  | 0.406898  |
| 6                                           | -1.048908 | -1.118415 | 2.576096  | 8                                            | 0.284649  | 3.020117  | -0.363864 |
| 6                                           | -2.533478 | -0.200555 | 0.152419  | 6                                            | 1.054557  | 3.983491  | 0.317735  |
| 7                                           | -3.179243 | -1.377411 | 0.087345  | 8                                            | 0.075345  | 1.958357  | 1.601535  |
| 6                                           | -4.616751 | -1.160052 | -0.003527 | 6                                            | 0.209613  | -0.243443 | -1.865427 |
| 6                                           | -4.707251 | 0.324318  | -0.395734 | 8                                            | -0.546828 | -1.212766 | -1.969841 |
| 7                                           | -3.394328 | 0.819437  | -0.020043 | 6                                            | 1.578758  | -0.375880 | -1.284827 |
| 6                                           | -2.565027 | -2.622711 | -0.315119 | 6                                            | 2.452971  | 0.706514  | -1.251671 |
| 6                                           | -3.168999 | 2.155524  | 0.469989  | 6                                            | 3.736283  | 0.557101  | -0.765194 |
| 6                                           | -5.006478 | 0.554357  | -1.864155 | 6                                            | 4.168338  | -0.687912 | -0.315510 |
| 6                                           | -5.327193 | -1.497291 | 1.292214  | 6                                            | 3.305490  | -1.777359 | -0.368928 |
| 8                                           | 0.635309  | 2.957659  | -0.301958 | 6                                            | 2.023451  | -1.621724 | -0.855820 |
| 6                                           | 1.407140  | 3.898019  | 0.409570  | 6                                            | 5.527773  | -0.908326 | 0.215551  |
| 1                                           | -2.291188 | -3.235510 | 0.543524  | 8                                            | 5.942580  | -1.965062 | 0.615582  |
| 1                                           | -3.282079 | -3.178486 | -0.914857 | 8                                            | 6.270928  | 0.200755  | 0.211240  |
| 1                                           | -1.687025 | -2.411784 | -0.922769 | 1                                            | -2.462363 | -3.228706 | 0.606725  |
| 1                                           | -2.859618 | 2.838542  | -0.319135 | 1                                            | -3.492911 | -3.221741 | -0.824776 |
| 1                                           | -4.092590 | 2.524005  | 0.912575  | 1                                            | -1.922665 | -2.408515 | -0.887413 |
| 1                                           | -2.397117 | 2.138736  | 1.234339  | 1                                            | -3.224688 | 2.815286  | -0.308011 |
| 1                                           | -5.005194 | -1.781587 | -0.809863 | 1                                            | -4.423108 | 2.477921  | 0.951675  |
| 1                                           | -5.454444 | 0.827214  | 0.218489  | 1                                            | -2.711035 | 2.145086  | 1.242266  |
| 1                                           | -4.971169 | 1.615159  | -2.105274 | 1                                            | -5.247013 | -1.869579 | -0.709198 |
| 1                                           | -4.274125 | 0.040894  | -2.485527 | 1                                            | -5.751232 | 0.741145  | 0.281886  |
| 1                                           | -5.998852 | 0.182493  | -2.117012 | 1                                            | -5.309783 | 1.506803  | -2.058178 |



|                                         |           |           |           |                                         |           |           |           |
|-----------------------------------------|-----------|-----------|-----------|-----------------------------------------|-----------|-----------|-----------|
| 1                                       | -6.401859 | -1.348975 | 1.191542  | 1                                       | -4.574890 | -0.054122 | -2.421534 |
| 1                                       | -5.153222 | -2.535179 | 1.570021  | 1                                       | -6.299814 | 0.047763  | -2.039534 |
| 1                                       | -4.965407 | -0.864245 | 2.101432  | 1                                       | -6.619234 | -1.442835 | 1.310407  |
| 1                                       | -1.089561 | 1.362355  | -1.194179 | 1                                       | -5.332254 | -2.588680 | 1.684924  |
| 1                                       | 0.514489  | -0.536565 | 1.251660  | 1                                       | -5.180524 | -0.904874 | 2.186257  |
| 1                                       | -0.368524 | -1.928884 | 0.681918  | 1                                       | -1.433367 | 1.385567  | -1.192674 |
| 1                                       | 0.470899  | 0.530792  | -2.522658 | 1                                       | 0.274768  | -0.451021 | 1.232397  |
| 1                                       | 1.689661  | -2.473708 | -0.776085 | 1                                       | -0.577772 | -1.871063 | 0.684415  |
| 1                                       | 3.996835  | -2.701897 | 0.167931  | 1                                       | 0.124723  | 0.607680  | -2.554600 |
| 1                                       | 4.727826  | 1.409141  | -0.682572 | 1                                       | 1.346316  | -2.459093 | -0.930360 |
| 1                                       | 2.437622  | 1.633423  | -1.589300 | 1                                       | 3.665655  | -2.737597 | -0.031998 |
| 1                                       | 1.721715  | 4.638253  | -0.318860 | 1                                       | 4.411669  | 1.397458  | -0.732709 |
| 1                                       | 0.822661  | 4.371965  | 1.194624  | 1                                       | 2.109333  | 1.671563  | -1.595276 |
| 1                                       | 2.274459  | 3.426366  | 0.864486  | 1                                       | 1.332276  | 4.723905  | -0.425387 |
| 1                                       | -0.417595 | -1.782754 | 3.163823  | 1                                       | 0.481881  | 4.451607  | 1.114966  |
| 1                                       | -1.072053 | -0.147196 | 3.064628  | 1                                       | 1.944666  | 3.535731  | 0.752582  |
| 1                                       | -2.054487 | -1.538468 | 2.567543  | 1                                       | -0.584064 | -1.718014 | 3.165423  |
| 8                                       | 6.585183  | 0.266567  | 0.339262  | 1                                       | -1.286596 | -0.102081 | 3.074389  |
| 8                                       | 6.267656  | -1.878963 | 0.816640  | 1                                       | -2.238642 | -1.521880 | 2.600181  |
| 1                                       | 7.434084  | 0.025784  | 0.725127  | 6                                       | 7.582586  | 0.045164  | 0.712996  |
| NImag = 1 (-112.5183 cm <sup>-1</sup> ) |           |           |           | 1                                       | 8.044496  | 1.023305  | 0.643844  |
|                                         |           |           |           | 1                                       | 7.561036  | -0.291695 | 1.745780  |
|                                         |           |           |           | 1                                       | 8.136756  | -0.678326 | 0.121287  |
|                                         |           |           |           | NImag = 1 (-115.3315 cm <sup>-1</sup> ) |           |           |           |
| <b>TS6(Cl)re-si</b>                     |           |           |           | <b>TS6(F)re-si</b>                      |           |           |           |
| Et = -1590.6446867                      |           |           |           | Et = -1230.2409847                      |           |           |           |
| 6                                       | 2.626291  | -1.679785 | -0.380355 | 7                                       | -2.625955 | -1.340455 | 0.200536  |
| 6                                       | 2.157081  | -0.563712 | -1.060214 | 6                                       | -2.010523 | -0.143581 | 0.172802  |
| 6                                       | 3.026848  | 0.496481  | -1.288569 | 7                                       | -2.881330 | 0.822763  | -0.174644 |
| 6                                       | 4.327270  | 0.463730  | -0.818527 | 6                                       | -4.132888 | 0.241210  | -0.626390 |
| 6                                       | 4.763227  | -0.650781 | -0.121283 | 6                                       | -4.056317 | -1.170869 | -0.024811 |
| 6                                       | 3.923181  | -1.728800 | 0.099012  | 7                                       | -0.745306 | 0.087378  | 0.455044  |
| 6                                       | 0.771392  | -0.562676 | -1.622305 | 6                                       | -0.000294 | -0.750129 | 1.396256  |
| 8                                       | 0.075586  | -1.589282 | -1.608423 | 6                                       | -0.648213 | -0.791229 | 2.762030  |
| 17                                      | 6.394627  | -0.702833 | 0.468609  | 6                                       | -2.733478 | 2.211538  | 0.173794  |
| 6                                       | -0.280520 | 0.798792  | -0.340119 | 6                                       | -4.251220 | 0.256130  | -2.138091 |
| 6                                       | 0.453307  | 1.722452  | 0.479830  | 6                                       | -4.856491 | -1.338194 | 1.251416  |
| 8                                       | 0.603466  | 1.665528  | 1.685523  | 6                                       | -1.959695 | -2.601463 | -0.038986 |
| 7                                       | -1.116683 | -0.115708 | 0.377121  | 6                                       | -0.012986 | 1.032422  | -0.329950 |
| 6                                       | -0.483451 | -1.100256 | 1.259245  | 6                                       | 0.665648  | 2.056000  | 0.401728  |
| 6                                       | -1.107307 | -1.108892 | 2.636999  | 8                                       | 1.183007  | 2.995729  | -0.427034 |
| 6                                       | -2.407977 | -0.153978 | 0.117136  | 6                                       | 1.930916  | 4.001876  | 0.215354  |
| 7                                       | -3.157256 | 0.942837  | -0.096344 | 8                                       | 0.842361  | 2.109194  | 1.605647  |
| 6                                       | -4.498447 | 0.575879  | -0.516473 | 6                                       | 1.037341  | -0.333959 | -1.696574 |

|                                          |           |           |           |                                           |           |           |           |
|------------------------------------------|-----------|-----------|-----------|-------------------------------------------|-----------|-----------|-----------|
| 6                                        | -4.565917 | -0.909550 | -0.120236 | 8                                         | 0.194290  | -1.226009 | -1.847198 |
| 7                                        | -3.160874 | -1.262725 | 0.030527  | 6                                         | 2.344650  | -0.602380 | -1.027927 |
| 6                                        | -2.817258 | 2.257686  | 0.385021  | 6                                         | 2.650859  | -1.894624 | -0.621214 |
| 6                                        | -2.649955 | -2.561519 | -0.349201 | 6                                         | 3.878358  | -2.190999 | -0.054545 |
| 6                                        | -5.360424 | -1.171739 | 1.143551  | 6                                         | 4.800538  | -1.174958 | 0.089520  |
| 6                                        | -4.725399 | 0.828687  | -1.994033 | 6                                         | 4.536022  | 0.117393  | -0.320427 |
| 8                                        | 1.035415  | 2.689623  | -0.260531 | 6                                         | 3.304792  | 0.393986  | -0.885705 |
| 6                                        | 1.883715  | 3.556750  | 0.458730  | 1                                         | -1.695444 | -3.102663 | 0.891981  |
| 1                                        | -2.501333 | -3.206129 | 0.516653  | 1                                         | -2.639731 | -3.247001 | -0.589518 |
| 1                                        | -3.375982 | -3.035543 | -1.006129 | 1                                         | -1.072786 | -2.428218 | -0.646285 |
| 1                                        | -1.712898 | -2.433860 | -0.889423 | 1                                         | -2.400709 | 2.817349  | -0.667595 |
| 1                                        | -2.408800 | 2.892206  | -0.399559 | 1                                         | -3.693514 | 2.588835  | 0.521774  |
| 1                                        | -3.715187 | 2.725470  | 0.784272  | 1                                         | -2.008447 | 2.308997  | 0.976688  |
| 1                                        | -2.081927 | 2.175722  | 1.180719  | 1                                         | -4.375613 | -1.907263 | -0.761143 |
| 1                                        | -4.977403 | -1.494868 | -0.942127 | 1                                         | -4.956630 | 0.797240  | -0.178871 |
| 1                                        | -5.213496 | 1.151078  | 0.072094  | 1                                         | -4.210727 | 1.274859  | -2.519155 |
| 1                                        | -4.578103 | 1.879816  | -2.235297 | 1                                         | -3.432014 | -0.305357 | -2.585362 |
| 1                                        | -4.027891 | 0.242831  | -2.590998 | 1                                         | -5.194361 | -0.187316 | -2.455881 |
| 1                                        | -5.740769 | 0.555549  | -2.279380 | 1                                         | -5.922880 | -1.232155 | 1.054701  |
| 1                                        | -6.410578 | -0.921951 | 0.995816  | 1                                         | -4.688056 | -2.321421 | 1.686856  |
| 1                                        | -5.298786 | -2.220235 | 1.428890  | 1                                         | -4.564543 | -0.588154 | 1.985355  |
| 1                                        | -4.975654 | -0.572268 | 1.967588  | 1                                         | -0.551641 | 1.357583  | -1.203265 |
| 1                                        | -0.785333 | 1.240274  | -1.184354 | 1                                         | 0.971872  | -0.282052 | 1.477106  |
| 1                                        | 0.548393  | -0.781632 | 1.334983  | 1                                         | 0.154420  | -1.743692 | 0.987273  |
| 1                                        | -0.480681 | -2.082898 | 0.800434  | 1                                         | 1.090263  | 0.505839  | -2.402388 |
| 1                                        | 0.666524  | 0.162579  | -2.443443 | 1                                         | 1.911334  | -2.665976 | -0.775303 |
| 1                                        | 1.957835  | -2.518080 | -0.253788 | 1                                         | 4.134845  | -3.190133 | 0.262866  |
| 1                                        | 4.288751  | -2.595647 | 0.627614  | 1                                         | 5.290082  | 0.879047  | -0.195319 |
| 1                                        | 5.002966  | 1.286154  | -0.996227 | 1                                         | 3.073725  | 1.398834  | -1.210060 |
| 1                                        | 2.678226  | 1.360740  | -1.835081 | 1                                         | 2.268078  | 4.670729  | -0.569835 |
| 1                                        | 2.261373  | 4.272030  | -0.264495 | 1                                         | 1.321933  | 4.546258  | 0.933367  |
| 1                                        | 1.339492  | 4.072601  | 1.245935  | 1                                         | 2.784175  | 3.580762  | 0.741551  |
| 1                                        | 2.706914  | 3.008214  | 0.908861  | 1                                         | -0.037825 | -1.388190 | 3.437621  |
| 1                                        | -0.580103 | -1.818953 | 3.272270  | 1                                         | -0.715938 | 0.217254  | 3.163293  |
| 1                                        | -1.023857 | -0.121197 | 3.084013  | 1                                         | -1.644299 | -1.232227 | 2.736200  |
| 1                                        | -2.156340 | -1.404236 | 2.612878  | 9                                         | 5.988134  | -1.449990 | 0.632866  |
| NImag = 1 (-145.6391 cm <sup>-1</sup> )  |           |           |           | NImag = 1 (-143.0359 cm <sup>-1</sup> )   |           |           |           |
| <b>TS6(H)re-si</b><br>Et = -1131.0385392 |           |           |           | <b>TS6(Me)re-si</b><br>Et = -1170.3488474 |           |           |           |
| 7                                        | -2.536903 | 0.935534  | -0.289361 | 6                                         | 3.228731  | 0.370921  | -0.901716 |
| 6                                        | -1.739737 | -0.038979 | 0.191119  | 6                                         | 2.235401  | -0.588830 | -1.069566 |
| 7                                        | -2.430363 | -1.192866 | 0.303026  | 6                                         | 2.508003  | -1.898367 | -0.702779 |
| 6                                        | -3.833805 | -0.958023 | -0.021442 | 6                                         | 3.733682  | -2.236565 | -0.153065 |
| 6                                        | -3.775889 | 0.368799  | -0.790430 | 6                                         | 4.722034  | -1.279232 | 0.037436  |

|   |           |           |           |   |           |           |           |
|---|-----------|-----------|-----------|---|-----------|-----------|-----------|
| 7 | -0.477550 | 0.148909  | 0.511695  | 6 | 4.448957  | 0.030939  | -0.352278 |
| 6 | 0.184199  | -0.659498 | 1.538250  | 6 | 0.934741  | -0.252764 | -1.715684 |
| 6 | -0.477823 | -0.511264 | 2.889728  | 8 | 0.044302  | -1.097404 | -1.867953 |
| 6 | -1.836511 | -2.506537 | 0.181315  | 6 | 6.043828  | -1.634781 | 0.648274  |
| 6 | -4.700720 | -0.908829 | 1.220720  | 6 | -0.041453 | 1.123331  | -0.284353 |
| 6 | -3.743390 | 0.199460  | -2.297407 | 6 | 0.656923  | 2.159692  | 0.406782  |
| 6 | -2.341311 | 2.341893  | -0.059206 | 8 | 0.891357  | 2.232486  | 1.600041  |
| 6 | 0.331967  | 0.995826  | -0.306541 | 7 | -0.736594 | 0.173166  | 0.526574  |
| 6 | 1.099667  | 1.989231  | 0.372674  | 6 | 0.039694  | -0.604745 | 1.494128  |
| 8 | 1.689840  | 2.837903  | -0.506034 | 6 | -0.609097 | -0.622521 | 2.859910  |
| 6 | 2.528975  | 3.804254  | 0.080814  | 6 | -1.979094 | -0.137956 | 0.224460  |
| 8 | 1.292756  | 2.088549  | 1.571522  | 7 | -2.541783 | -1.361870 | 0.305248  |
| 6 | 1.234670  | -0.538572 | -1.637405 | 6 | -3.967548 | -1.267387 | 0.006679  |
| 8 | 0.281072  | -1.310889 | -1.780861 | 6 | -4.066048 | 0.087552  | -0.707046 |
| 6 | 2.478029  | -0.946725 | -0.921252 | 7 | -2.886725 | 0.763567  | -0.199297 |
| 6 | 3.541127  | -0.063396 | -0.766809 | 6 | -1.814172 | -2.599294 | 0.123716  |
| 6 | 4.708227  | -0.472869 | -0.147756 | 6 | -2.834079 | 2.173884  | 0.076363  |
| 6 | 4.831121  | -1.776197 | 0.313935  | 6 | -4.040290 | -0.017563 | -2.220210 |
| 6 | 3.782586  | -2.667093 | 0.145263  | 6 | -4.814327 | -1.363932 | 1.259960  |
| 6 | 2.614262  | -2.254403 | -0.473428 | 8 | 1.126732  | 3.092667  | -0.459024 |
| 1 | -1.607061 | -2.939726 | 1.154559  | 6 | 1.895900  | 4.112340  | 0.133172  |
| 1 | -2.550322 | -3.157947 | -0.316513 | 1 | -1.495079 | -3.024593 | 1.074843  |
| 1 | -0.939580 | -2.438506 | -0.431876 | 1 | -2.475210 | -3.314372 | -0.359009 |
| 1 | -1.950900 | 2.857459  | -0.935520 | 1 | -0.958948 | -2.418626 | -0.525349 |
| 1 | -3.295698 | 2.788228  | 0.215514  | 1 | -2.524051 | 2.757177  | -0.789712 |
| 1 | -1.643421 | 2.481110  | 0.760775  | 1 | -3.822240 | 2.507116  | 0.389548  |
| 1 | -4.171382 | -1.757209 | -0.679374 | 1 | -2.132263 | 2.358742  | 0.883890  |
| 1 | -4.602055 | 1.015749  | -0.496711 | 1 | -4.227438 | -2.070739 | -0.680684 |
| 1 | -3.619361 | 1.161643  | -2.790959 | 1 | -4.951860 | 0.628812  | -0.375759 |
| 1 | -2.906712 | -0.436820 | -2.584036 | 1 | -4.035639 | 0.971157  | -2.675545 |
| 1 | -4.668654 | -0.249431 | -2.657540 | 1 | -3.140751 | -0.541108 | -2.542549 |
| 1 | -5.747386 | -0.761877 | 0.956073  | 1 | -4.914294 | -0.555047 | -2.587075 |
| 1 | -4.618994 | -1.836362 | 1.784177  | 1 | -5.875028 | -1.318810 | 1.014829  |
| 1 | -4.390303 | -0.090578 | 1.869393  | 1 | -4.625468 | -2.300481 | 1.781385  |
| 1 | -0.167463 | 1.317586  | -1.202950 | 1 | -4.581453 | -0.545595 | 1.940104  |
| 1 | 1.196689  | -0.282163 | 1.587793  | 1 | -0.605849 | 1.433304  | -1.145516 |
| 1 | 0.245390  | -1.697855 | 1.228860  | 1 | 0.995340  | -0.102099 | 1.558239  |
| 1 | 1.403782  | 0.276712  | -2.352959 | 1 | 0.228136  | -1.605278 | 1.118438  |
| 1 | 1.795283  | -2.939183 | -0.637143 | 1 | 1.007249  | 0.606823  | -2.394986 |
| 1 | 3.880948  | -3.687526 | 0.488087  | 1 | 1.750059  | -2.648460 | -0.874778 |
| 1 | 5.743859  | -2.096540 | 0.795433  | 1 | 3.931355  | -3.263835 | 0.123390  |
| 1 | 5.525790  | 0.222917  | -0.024120 | 1 | 5.207788  | 0.791288  | -0.222797 |
| 1 | 3.436083  | 0.952348  | -1.122346 | 1 | 3.028329  | 1.392385  | -1.194927 |
| 1 | 2.920434  | 4.397447  | -0.739325 | 1 | 2.193320  | 4.770728  | -0.676679 |
| 1 | 1.976424  | 4.438979  | 0.769877  | 1 | 1.316814  | 4.664944  | 0.869602  |
| 1 | 3.344325  | 3.336437  | 0.627418  | 1 | 2.775035  | 3.704896  | 0.626650  |

|                                            |           |           |           |                                           |           |           |           |
|--------------------------------------------|-----------|-----------|-----------|-------------------------------------------|-----------|-----------|-----------|
| 1                                          | 0.061686  | -1.101734 | 3.628548  | 1                                         | 0.017306  | -1.179288 | 3.554961  |
| 1                                          | -0.448187 | 0.531382  | 3.196781  | 1                                         | -0.707761 | 0.395536  | 3.229487  |
| 1                                          | -1.512722 | -0.852550 | 2.880709  | 1                                         | -1.591892 | -1.092894 | 2.845641  |
| NImag = 1 (-139.4587 cm <sup>-1</sup> )    |           |           |           | 1                                         | 6.171028  | -2.713016 | 0.719704  |
|                                            |           |           |           | 1                                         | 6.872660  | -1.238385 | 0.062510  |
|                                            |           |           |           | 1                                         | 6.136678  | -1.224656 | 1.654871  |
|                                            |           |           |           | NImag = 1 (-145.8350 cm <sup>-1</sup> )   |           |           |           |
| <b>TS6(OMe)re-si</b><br>Et = -1245.5241639 |           |           |           | <b>TS6(OH)re-si</b><br>Et = -1206.2284067 |           |           |           |
| 6                                          | 2.229743  | -1.813378 | -0.798332 | 6                                         | 2.520292  | -1.909025 | -0.668339 |
| 6                                          | 1.935744  | -0.495243 | -1.134825 | 6                                         | 2.250950  | -0.599344 | -1.035962 |
| 6                                          | 2.925917  | 0.461610  | -0.971980 | 6                                         | 3.250068  | 0.355819  | -0.867715 |
| 6                                          | 4.169858  | 0.133526  | -0.457209 | 6                                         | 4.471961  | 0.022786  | -0.321422 |
| 6                                          | 4.439891  | -1.184395 | -0.106579 | 6                                         | 4.720849  | -1.291410 | 0.058186  |
| 6                                          | 3.462071  | -2.158704 | -0.286422 | 6                                         | 3.742409  | -2.259186 | -0.120007 |
| 6                                          | 0.614136  | -0.157594 | -1.734635 | 6                                         | 0.950709  | -0.262077 | -1.680439 |
| 8                                          | -0.268331 | -1.015427 | -1.882009 | 8                                         | 0.061528  | -1.111511 | -1.832124 |
| 8                                          | 5.614565  | -1.613129 | 0.403638  | 6                                         | -0.025777 | 1.116379  | -0.284935 |
| 6                                          | 6.627480  | -0.671694 | 0.603226  | 6                                         | 0.672781  | 2.156431  | 0.403693  |
| 6                                          | -0.341926 | 1.166291  | -0.281194 | 8                                         | 0.896216  | 2.238619  | 1.598022  |
| 6                                          | 0.360833  | 2.212281  | 0.392715  | 7                                         | -0.733898 | 0.180553  | 0.532587  |
| 8                                          | 0.641039  | 2.283776  | 1.575787  | 6                                         | 0.031286  | -0.593466 | 1.511720  |
| 7                                          | -0.994686 | 0.198132  | 0.544433  | 6                                         | -0.627061 | -0.595625 | 2.873059  |
| 6                                          | -0.177202 | -0.558618 | 1.494778  | 6                                         | -1.974090 | -0.129713 | 0.220400  |
| 6                                          | -0.804074 | -0.606199 | 2.870086  | 7                                         | -2.873754 | 0.770613  | -0.222310 |
| 6                                          | -2.227597 | -0.159278 | 0.252823  | 6                                         | -4.048144 | 0.092620  | -0.738982 |
| 7                                          | -3.170960 | 0.708601  | -0.163562 | 6                                         | -3.965521 | -1.251900 | -0.004278 |
| 6                                          | -4.323788 | -0.011106 | -0.671494 | 7                                         | -2.542946 | -1.350341 | 0.309261  |
| 6                                          | -4.176781 | -1.357280 | 0.049455  | 6                                         | -2.819337 | 2.183717  | 0.037686  |
| 7                                          | -2.747050 | -1.401893 | 0.343162  | 6                                         | -1.818992 | -2.592152 | 0.142955  |
| 6                                          | -3.169406 | 2.120561  | 0.105475  | 6                                         | -4.824291 | -1.323505 | 1.242486  |
| 6                                          | -1.978883 | -2.613522 | 0.152352  | 6                                         | -3.997920 | -0.034226 | -2.249861 |
| 6                                          | -5.014372 | -1.474311 | 1.307084  | 8                                         | 1.156286  | 3.077581  | -0.466332 |
| 6                                          | -4.287206 | -0.122317 | -2.184108 | 6                                         | 1.925736  | 4.099205  | 0.123203  |
| 8                                          | 0.780583  | 3.157979  | -0.485499 | 1                                         | -1.511408 | -3.012577 | 1.100089  |
| 6                                          | 1.547401  | 4.192125  | 0.083841  | 1                                         | -2.478287 | -3.307559 | -0.341690 |
| 1                                          | -1.621600 | -3.019173 | 1.098329  | 1                                         | -0.956934 | -2.418207 | -0.499017 |
| 1                                          | -2.625252 | -3.355876 | -0.308198 | 1                                         | -2.502572 | 2.756493  | -0.833009 |
| 1                                          | -1.147616 | -2.405772 | -0.519368 | 1                                         | -3.808417 | 2.523233  | 0.341118  |
| 1                                          | -2.905130 | 2.712389  | -0.770146 | 1                                         | -2.121968 | 2.375610  | 0.847385  |
| 1                                          | -4.162103 | 2.415514  | 0.442268  | 1                                         | -4.223963 | -2.064120 | -0.681586 |
| 1                                          | -2.455807 | 2.336991  | 0.894322  | 1                                         | -4.936651 | 0.642295  | -0.429518 |
| 1                                          | -4.412099 | -2.173026 | -0.631955 | 1                                         | -3.983746 | 0.947945  | -2.718948 |
| 1                                          | -5.229582 | 0.499075  | -0.345025 | 1                                         | -3.094004 | -0.563611 | -2.549708 |

|                                         |           |           |           |                                         |           |           |           |
|-----------------------------------------|-----------|-----------|-----------|-----------------------------------------|-----------|-----------|-----------|
| 1                                       | -4.323955 | 0.863630  | -2.644059 | 1                                       | -4.866890 | -0.575195 | -2.623481 |
| 1                                       | -3.363514 | -0.606622 | -2.499586 | 1                                       | -5.882428 | -1.276880 | 0.986866  |
| 1                                       | -5.135488 | -0.698930 | -2.551996 | 1                                       | -4.645019 | -2.252322 | 1.780787  |
| 1                                       | -6.077100 | -1.466129 | 1.066677  | 1                                       | -4.593238 | -0.495301 | 1.911200  |
| 1                                       | -4.791873 | -2.400653 | 1.833462  | 1                                       | -0.588423 | 1.427594  | -1.146966 |
| 1                                       | -4.805830 | -0.644372 | 1.981052  | 1                                       | 0.989710  | -0.096443 | 1.578134  |
| 1                                       | -0.943323 | 1.476644  | -1.116651 | 1                                       | 0.215795  | -1.598408 | 1.145846  |
| 1                                       | 0.761605  | -0.024259 | 1.548271  | 1                                       | 1.029958  | 0.586150  | -2.373371 |
| 1                                       | 0.039060  | -1.550043 | 1.110234  | 1                                       | 1.758748  | -2.655933 | -0.837167 |
| 1                                       | 0.663169  | 0.708102  | -2.408539 | 1                                       | 3.942222  | -3.286891 | 0.157354  |
| 1                                       | 1.472952  | -2.565543 | -0.965227 | 8                                       | 5.934344  | -1.570420 | 0.586644  |
| 1                                       | 3.701018  | -3.179219 | -0.026826 | 1                                       | 5.247641  | 0.760165  | -0.181247 |
| 1                                       | 4.913852  | 0.904595  | -0.335053 | 1                                       | 3.053009  | 1.378047  | -1.159929 |
| 1                                       | 2.714363  | 1.488052  | -1.238873 | 1                                       | 2.234542  | 4.747587  | -0.690357 |
| 1                                       | 1.805291  | 4.857693  | -0.733669 | 1                                       | 1.342339  | 4.662095  | 0.848261  |
| 1                                       | 0.981094  | 4.731803  | 0.839576  | 1                                       | 2.797607  | 3.691704  | 0.629251  |
| 1                                       | 2.449869  | 3.802209  | 0.548599  | 1                                       | -0.009422 | -1.150534 | 3.577402  |
| 1                                       | -0.148671 | -1.145473 | 3.552020  | 1                                       | -0.721581 | 0.426118  | 3.233356  |
| 1                                       | -0.931631 | 0.405583  | 3.248143  | 1                                       | -1.612868 | -1.059520 | 2.855402  |
| 1                                       | -1.770758 | -1.108989 | 2.867786  | 1                                       | 5.977981  | -2.503448 | 0.798398  |
| 1                                       | 7.469895  | -1.215505 | 1.017770  |                                         |           |           |           |
| 1                                       | 6.931951  | -0.203156 | -0.334231 |                                         |           |           |           |
| 1                                       | 6.322199  | 0.104448  | 1.306996  |                                         |           |           |           |
| NImag = 1 (-169.2115 cm <sup>-1</sup> ) |           |           |           | NImag = 1 (-161.3682 cm <sup>-1</sup> ) |           |           |           |
